# Supplementary material
Source: publisher figshare collection journal article supplement (https://acs.figshare.com/ndownloader/files/4486822)
Supplement: Supplementary file 1 [file 4486822]

 
data_1
 
_audit_creation_method            SHELXL-97 
_chemical_name_systematic 
; 
 ? 
; 
_chemical_name_common             ? 
_chemical_melting_point           ? 
_chemical_formula_moiety          ? 
_chemical_formula_sum 
 'C112 H80 B2 Cl2 Fe2 N34 Ni2 O14 S16' 
_chemical_formula_weight          2960.70 
 
loop_ 
 _atom_type_symbol 
 _atom_type_description 
 _atom_type_scat_dispersion_real 
 _atom_type_scat_dispersion_imag 
 _atom_type_scat_source 
 'C'  'C'   0.0033   0.0016 
 'International Tables Vol C Tables 4.2.6.8 and 6.1.1.4' 
 'B'  'B'   0.0013   0.0007 
 'International Tables Vol C Tables 4.2.6.8 and 6.1.1.4' 
 'N'  'N'   0.0061   0.0033 
 'International Tables Vol C Tables 4.2.6.8 and 6.1.1.4' 
 'S'  'S'   0.1246   0.1234 
 'International Tables Vol C Tables 4.2.6.8 and 6.1.1.4' 
 'Fe'  'Fe'   0.3463   0.8444 
 'International Tables Vol C Tables 4.2.6.8 and 6.1.1.4' 
 'Ni'  'Ni'   0.3393   1.1124 
 'International Tables Vol C Tables 4.2.6.8 and 6.1.1.4' 
 'H'  'H'   0.0000   0.0000 
 'International Tables Vol C Tables 4.2.6.8 and 6.1.1.4' 
 'Cl'  'Cl'   0.1484   0.1585 
 'International Tables Vol C Tables 4.2.6.8 and 6.1.1.4' 
 'O'  'O'   0.0106   0.0060 
 'International Tables Vol C Tables 4.2.6.8 and 6.1.1.4' 
 
_symmetry_cell_setting            triclinic 
_symmetry_space_group_name_H-M    P-1 
 
loop_ 
 _symmetry_equiv_pos_as_xyz 
 'x, y, z' 
 '-x, -y, -z' 
 
_cell_length_a                    14.668(2) 
_cell_length_b                    14.929(2) 
_cell_length_c                    18.808(3) 
_cell_angle_alpha                 99.914(2) 
_cell_angle_beta                  91.470(3) 
_cell_angle_gamma                 101.981(2) 
_cell_volume                      3960.7(10) 
_cell_formula_units_Z             1 
_cell_measurement_temperature     291(2) 
_cell_measurement_reflns_used     1855 
_cell_measurement_theta_min       1.9 
_cell_measurement_theta_max       24.5 
 
_exptl_crystal_description        'rhombic'
_exptl_crystal_colour             'Red'   
_exptl_crystal_size_max           0.28 
_exptl_crystal_size_mid           0.24 
_exptl_crystal_size_min           0.22 
_exptl_crystal_density_meas       ? 
_exptl_crystal_density_diffrn     1.241 
_exptl_crystal_density_method     'not measured' 
_exptl_crystal_F_000              1510 
_exptl_absorpt_coefficient_mu     0.719 
_exptl_absorpt_correction_type    'multi-scan' 
_exptl_absorpt_correction_T_min   0.8241 
_exptl_absorpt_correction_T_max   0.8579 
_exptl_absorpt_process_details    'SADABS; Bruker, 2000'
 
_exptl_special_details 
; 
 ? 
; 
 
_diffrn_ambient_temperature       291(2) 
_diffrn_radiation_wavelength      0.71073 
_diffrn_radiation_type            MoK\a 
_diffrn_radiation_source          'fine-focus sealed tube' 
_diffrn_radiation_monochromator   graphite 
_diffrn_measurement_device_type   ? 
_diffrn_measurement_method        ? 
_diffrn_detector_area_resol_mean  ? 
_diffrn_standards_number          ? 
_diffrn_standards_interval_count  ? 
_diffrn_standards_interval_time   ? 
_diffrn_standards_decay_%         ? 
_diffrn_reflns_number             21475 
_diffrn_reflns_av_R_equivalents   0.0252 
_diffrn_reflns_av_sigmaI/netI     0.0756 
_diffrn_reflns_limit_h_min        -17 
_diffrn_reflns_limit_h_max        18 
_diffrn_reflns_limit_k_min        -18 
_diffrn_reflns_limit_k_max        18 
_diffrn_reflns_limit_l_min        -15 
_diffrn_reflns_limit_l_max        23 
_diffrn_reflns_theta_min          1.63 
_diffrn_reflns_theta_max          26.00 
_reflns_number_total              15169 
_reflns_number_gt                 10686 
_reflns_threshold_expression      >2sigma(I) 
 
_computing_data_collection      'SMART (Bruker, 2000)'
_computing_cell_refinement      'SMART'
_computing_data_reduction       'SAINT (Bruker, 2000)'
_computing_structure_solution   'SHELXTL (Bruker, 2000)'
_computing_structure_refinement 'SHELXTL'
_computing_molecular_graphics   'SHELXTL'
_computing_publication_material 'SHELXTL' 
 
_refine_special_details 
; 
 Refinement of F^2^ against ALL reflections.  The weighted R-factor wR and 
 goodness of fit S are based on F^2^, conventional R-factors R are based 
 on F, with F set to zero for negative F^2^. The threshold expression of 
 F^2^ > 2sigma(F^2^) is used only for calculating R-factors(gt) etc. and is 
 not relevant to the choice of reflections for refinement.  R-factors based 
 on F^2^ are statistically about twice as large as those based on F, and R- 
 factors based on ALL data will be even larger. 
; 
 
_refine_ls_structure_factor_coef  Fsqd  
_refine_ls_matrix_type            fullcycle 
_refine_ls_weighting_scheme       calc  
_refine_ls_weighting_details 
 'calc w=1/[\s^2^(Fo^2^)+(0.0400P)^2^+1.2200P] where P=(Fo^2^+2Fc^2^)/3' 
_atom_sites_solution_primary      direct 
_atom_sites_solution_secondary    difmap 
_atom_sites_solution_hydrogens    geom 
_refine_ls_hydrogen_treatment     constr 
_refine_ls_extinction_method      none 
_refine_ls_extinction_coef        ? 
_refine_ls_number_reflns          15169 
_refine_ls_number_parameters      883 
_refine_ls_number_restraints      0 
_refine_ls_R_factor_all           0.0913 
_refine_ls_R_factor_gt            0.0588 
_refine_ls_wR_factor_ref          0.1077 
_refine_ls_wR_factor_gt           0.1027 
_refine_ls_goodness_of_fit_ref    1.092 
_refine_ls_restrained_S_all       1.092 
_refine_ls_shift/su_max           0.000 
_refine_ls_shift/su_mean          0.000 
 
loop_ 
 _atom_site_label 
 _atom_site_type_symbol 
 _atom_site_fract_x 
 _atom_site_fract_y 
 _atom_site_fract_z 
 _atom_site_U_iso_or_equiv 
 _atom_site_adp_type 
 _atom_site_occupancy 
 _atom_site_symmetry_multiplicity 
 _atom_site_calc_flag 
 _atom_site_refinement_flags 
 _atom_site_disorder_assembly 
 _atom_site_disorder_group 
B1 B 0.1208(3) 0.5684(3) 0.3472(2) 0.0402(9) Uani 1 1 d . . . 
H20A H 0.0781 0.5917 0.3177 0.048 Uiso 1 1 calc R . . 
C1 C 0.2620(2) 0.6763(2) 0.29997(19) 0.0424(8) Uani 1 1 d . . . 
H1 H 0.2294 0.7038 0.2698 0.051 Uiso 1 1 calc R . . 
C2 C 0.3556(3) 0.6942(3) 0.31191(19) 0.0462(9) Uani 1 1 d . . . 
H2 H 0.3995 0.7361 0.2924 0.055 Uiso 1 1 calc R . . 
C3 C 0.3732(3) 0.6356(2) 0.36060(17) 0.0422(8) Uani 1 1 d . . . 
H3 H 0.4316 0.6324 0.3790 0.051 Uiso 1 1 calc R . . 
C4 C 0.0542(3) 0.3987(3) 0.27438(19) 0.0478(9) Uani 1 1 d . . . 
H4 H 0.0114 0.4097 0.2414 0.057 Uiso 1 1 calc R . . 
C5 C 0.0716(3) 0.3155(3) 0.28043(19) 0.0470(9) Uani 1 1 d . . . 
H5 H 0.0420 0.2585 0.2528 0.056 Uiso 1 1 calc R . . 
C6 C 0.1419(2) 0.3293(2) 0.33546(19) 0.0424(8) Uani 1 1 d . . . 
H6 H 0.1676 0.2836 0.3511 0.051 Uiso 1 1 calc R . . 
C7 C 0.0385(3) 0.6278(2) 0.4646(2) 0.0454(9) Uani 1 1 d . . . 
H7 H -0.0079 0.6526 0.4457 0.055 Uiso 1 1 calc R . . 
C8 C 0.0546(2) 0.6240(2) 0.53591(19) 0.0402(8) Uani 1 1 d . . . 
H8 H 0.0219 0.6470 0.5741 0.048 Uiso 1 1 calc R . . 
C9 C 0.1278(2) 0.5802(2) 0.5412(2) 0.0421(8) Uani 1 1 d . . . 
H9 H 0.1519 0.5678 0.5839 0.051 Uiso 1 1 calc R . . 
C10 C 0.3503(2) 0.4291(2) 0.40778(19) 0.0383(8) Uani 1 1 d . . . 
C11 C 0.2241(2) 0.4055(2) 0.50258(19) 0.0411(8) Uani 1 1 d . . . 
C12 C 0.3451(2) 0.5681(2) 0.51267(18) 0.0355(7) Uani 1 1 d . . . 
C13 C 0.5740(2) 0.7482(2) 0.51095(19) 0.0415(8) Uani 1 1 d . . . 
H13 H 0.5765 0.6855 0.5020 0.050 Uiso 1 1 calc R . . 
C14 C 0.6018(2) 0.8016(2) 0.4573(2) 0.0405(8) Uani 1 1 d . . . 
H14 H 0.6183 0.7746 0.4125 0.049 Uiso 1 1 calc R . . 
C15 C 0.6034(2) 0.8952(2) 0.47374(19) 0.0386(8) Uani 1 1 d . . . 
H15 H 0.6260 0.9341 0.4416 0.046 Uiso 1 1 calc R . . 
C16 C 0.5708(2) 0.9310(2) 0.53912(17) 0.0382(7) Uani 1 1 d . . . 
H16 H 0.5666 0.9932 0.5501 0.046 Uiso 1 1 calc R . . 
C17 C 0.5449(2) 0.8716(2) 0.58707(18) 0.0384(8) Uani 1 1 d . . . 
C18 C 0.3080(2) 0.7300(2) 0.68027(18) 0.0403(8) Uani 1 1 d . . . 
H18 H 0.2930 0.6653 0.6736 0.048 Uiso 1 1 calc R . . 
C19 C 0.2406(2) 0.7781(2) 0.70115(17) 0.0367(7) Uani 1 1 d . . . 
H19 H 0.1808 0.7474 0.7090 0.044 Uiso 1 1 calc R . . 
C20 C 0.2652(3) 0.8778(2) 0.71054(19) 0.0436(8) Uani 1 1 d . . . 
H20 H 0.2220 0.9135 0.7258 0.052 Uiso 1 1 calc R . . 
C21 C 0.3525(2) 0.9186(2) 0.69677(18) 0.0384(8) Uani 1 1 d . . . 
H21 H 0.3684 0.9830 0.7005 0.046 Uiso 1 1 calc R . . 
C22 C 0.4199(2) 0.8656(2) 0.67690(17) 0.0365(7) Uani 1 1 d . . . 
C23 C 0.5116(2) 0.9090(2) 0.65779(17) 0.0376(7) Uani 1 1 d . . . 
C24 C 0.5659(2) 0.9822(2) 0.70217(16) 0.0353(7) Uani 1 1 d . . . 
C25 C 0.7147(2) 1.0884(2) 0.77306(17) 0.0361(7) Uani 1 1 d . . . 
C26 C 0.6474(2) 1.0854(2) 0.81892(18) 0.0365(7) Uani 1 1 d . . . 
C27 C 0.8160(2) 1.2356(2) 0.85365(18) 0.0385(8) Uani 1 1 d . . . 
C28 C 0.7491(2) 1.2347(2) 0.90299(18) 0.0372(7) Uani 1 1 d . . . 
C29 C 0.8754(2) 1.3927(3) 0.9023(2) 0.0437(8) Uani 1 1 d . . . 
C30 C 0.9359(3) 1.4770(3) 0.90207(19) 0.0482(9) Uani 1 1 d . . . 
H30 H 0.9826 1.4812 0.8695 0.058 Uiso 1 1 calc R . . 
C31 C 0.9265(3) 1.5563(3) 0.9513(2) 0.0491(9) Uani 1 1 d . . . 
H31 H 0.9672 1.6131 0.9512 0.059 Uiso 1 1 calc R . . 
C32 C 0.8572(2) 1.5504(2) 0.9999(2) 0.0423(8) Uani 1 1 d . . . 
H32 H 0.8511 1.6030 1.0324 0.051 Uiso 1 1 calc R . . 
C33 C 0.7968(2) 1.4653(2) 0.9997(2) 0.0456(9) Uani 1 1 d . . . 
H33 H 0.7501 1.4610 1.0323 0.055 Uiso 1 1 calc R . . 
C34 C 0.8056(2) 1.3868(2) 0.95163(19) 0.0406(8) Uani 1 1 d . . . 
C35 C 0.6678(2) 0.8060(2) 0.72060(18) 0.0359(7) Uani 1 1 d . . . 
H35 H 0.6879 0.7986 0.6739 0.043 Uiso 1 1 calc R . . 
C36 C 0.7268(3) 0.8616(2) 0.77506(19) 0.0462(9) Uani 1 1 d . . . 
H36 H 0.7877 0.8897 0.7676 0.055 Uiso 1 1 calc R . . 
C37 C 0.6914(3) 0.8734(3) 0.84034(19) 0.0469(9) Uani 1 1 d . . . 
H37 H 0.7279 0.9161 0.8774 0.056 Uiso 1 1 calc R . . 
C38 C 0.6081(2) 0.8287(2) 0.8563(2) 0.0426(9) Uani 1 1 d . . . 
H38 H 0.5892 0.8361 0.9034 0.051 Uiso 1 1 calc R . . 
C39 C 0.5521(2) 0.7719(2) 0.80082(18) 0.0382(8) Uani 1 1 d . . . 
C40 C 0.4219(2) 0.4998(2) 0.68135(19) 0.0372(8) Uani 1 1 d . . . 
H40 H 0.4245 0.4821 0.6317 0.045 Uiso 1 1 calc R . . 
C41 C 0.3990(2) 0.4327(3) 0.71994(19) 0.0422(8) Uani 1 1 d . . . 
H41 H 0.3822 0.3707 0.6972 0.051 Uiso 1 1 calc R . . 
C42 C 0.4006(2) 0.4560(2) 0.79288(19) 0.0385(8) Uani 1 1 d . . . 
H42 H 0.3885 0.4102 0.8213 0.046 Uiso 1 1 calc R . . 
C43 C 0.4204(2) 0.5490(2) 0.8241(2) 0.0389(8) Uani 1 1 d . . . 
H43 H 0.4201 0.5674 0.8738 0.047 Uiso 1 1 calc R . . 
C44 C 0.4406(2) 0.6133(2) 0.78010(18) 0.0358(7) Uani 1 1 d . . . 
C45 C 0.4582(2) 0.7155(2) 0.81085(18) 0.0398(8) Uani 1 1 d . . . 
C46 C 0.3971(2) 0.7501(2) 0.84957(18) 0.0395(8) Uani 1 1 d . . . 
C47 C 0.2880(2) 0.8609(2) 0.89781(16) 0.0361(8) Uani 1 1 d . . . 
C48 C 0.2337(2) 0.7768(2) 0.88563(18) 0.0401(8) Uani 1 1 d . . . 
C49 C 0.1597(2) 0.9281(2) 0.97063(17) 0.0335(7) Uani 1 1 d . . . 
C50 C 0.1059(2) 0.8381(2) 0.96204(17) 0.0338(7) Uani 1 1 d . . . 
C51 C 0.0681(2) 0.9755(2) 1.06697(18) 0.0412(8) Uani 1 1 d . . . 
C52 C 0.0471(2) 1.0451(2) 1.12011(18) 0.0403(8) Uani 1 1 d . . . 
H52 H 0.0809 1.1061 1.1250 0.048 Uiso 1 1 calc R . . 
C53 C -0.0238(2) 1.0230(2) 1.16515(19) 0.0421(8) Uani 1 1 d . . . 
H53 H -0.0372 1.0691 1.2008 0.051 Uiso 1 1 calc R . . 
C54 C -0.0752(3) 0.9323(2) 1.15744(19) 0.0421(8) Uani 1 1 d . . . 
H54 H -0.1231 0.9176 1.1877 0.051 Uiso 1 1 calc R . . 
C55 C -0.0547(3) 0.8631(2) 1.1041(2) 0.0441(8) Uani 1 1 d . . . 
H55 H -0.0888 0.8023 1.0993 0.053 Uiso 1 1 calc R . . 
C56 C 0.0157(2) 0.8843(2) 1.05845(18) 0.0375(7) Uani 1 1 d . . . 
Cl1 Cl 0.31465(6) 0.17185(6) 0.75466(5) 0.04108(19) Uani 1 1 d . . . 
Fe1 Fe 0.25609(3) 0.49490(3) 0.43905(2) 0.03113(11) Uani 1 1 d . . . 
N1 N 0.2238(2) 0.61243(19) 0.33870(16) 0.0406(7) Uani 1 1 d . . . 
N2 N 0.2915(2) 0.5859(2) 0.37527(16) 0.0421(7) Uani 1 1 d . . . 
N3 N 0.11109(19) 0.46499(19) 0.32570(15) 0.0385(7) Uani 1 1 d . . . 
N4 N 0.1646(2) 0.4199(2) 0.36086(16) 0.0463(8) Uani 1 1 d . . . 
N5 N 0.10353(19) 0.58806(19) 0.42569(15) 0.0384(7) Uani 1 1 d . . . 
N6 N 0.15855(19) 0.5585(2) 0.47659(15) 0.0398(7) Uani 1 1 d . . . 
N7 N 0.40526(19) 0.38792(19) 0.38756(15) 0.0387(6) Uani 1 1 d . . . 
N8 N 0.2067(2) 0.3547(2) 0.53956(16) 0.0439(7) Uani 1 1 d . . . 
N9 N 0.3999(2) 0.6110(2) 0.55717(16) 0.0441(7) Uani 1 1 d . . . 
N10 N 0.54509(19) 0.78222(19) 0.57215(15) 0.0381(6) Uani 1 1 d . . . 
N11 N 0.39517(19) 0.77239(18) 0.66909(16) 0.0395(7) Uani 1 1 d . . . 
N12 N 0.8815(2) 1.3160(2) 0.85282(15) 0.0411(7) Uani 1 1 d . . . 
N13 N 0.7403(2) 1.3063(2) 0.95370(17) 0.0470(7) Uani 1 1 d . . . 
N14 N 0.58277(19) 0.76214(19) 0.73182(15) 0.0391(7) Uani 1 1 d . . . 
N15 N 0.44081(19) 0.58790(19) 0.70789(15) 0.0387(7) Uani 1 1 d . . . 
N16 N 0.1390(2) 0.9974(2) 1.02413(16) 0.0454(7) Uani 1 1 d . . . 
N17 N 0.03552(19) 0.8183(2) 1.00460(15) 0.0408(7) Uani 1 1 d . . . 
Ni1 Ni 0.49256(3) 0.68680(3) 0.64156(2) 0.03306(10) Uani 1 1 d . . . 
O1 O 0.27252(17) 0.24568(16) 0.78826(12) 0.0415(6) Uani 1 1 d . . . 
O2 O 0.31934(18) 0.10819(17) 0.80325(13) 0.0450(6) Uani 1 1 d . . . 
O3 O 0.25576(17) 0.12001(17) 0.69276(13) 0.0471(6) Uani 1 1 d . . . 
O4 O 0.40409(16) 0.20557(16) 0.73205(13) 0.0388(5) Uani 1 1 d . . . 
O5 O 0.7139(3) 0.1519(3) 0.5012(2) 0.0255(11) Uani 0.40 1 d P . . 
H5D H 0.6825 0.1883 0.4872 0.031 Uiso 0.40 1 d PR . . 
H5B H 0.7515 0.1388 0.4693 0.038 Uiso 0.40 1 d PR . . 
O6 O 0.1619(4) 0.4868(4) 0.7143(3) 0.0205(13) Uani 0.30 1 d P . . 
H6A H 0.1481 0.4718 0.7549 0.031 Uiso 0.30 1 d PR . . 
H6C H 0.1140 0.4693 0.6849 0.031 Uiso 0.30 1 d PR . . 
O7 O 0.3124(4) 0.4361(4) 0.1771(3) 0.0208(13) Uani 0.30 1 d P . . 
H7A H 0.2759 0.4613 0.1553 0.031 Uiso 0.30 1 d PR . . 
H7C H 0.3049 0.3791 0.1577 0.031 Uiso 0.30 1 d PR . . 
O8 O 0.1449(3) 0.1119(3) 0.4004(2) 0.0251(11) Uani 0.40 1 d P . . 
H8A H 0.1361 0.0570 0.3759 0.038 Uiso 0.40 1 d PR . . 
H8C H 0.0937 0.1216 0.4169 0.038 Uiso 0.40 1 d PR . . 
O9 O 0.7155(5) 0.7270(5) 0.0109(4) 0.0297(15) Uani 0.30 1 d P . . 
H9B H 0.7008 0.7097 -0.0342 0.044 Uiso 0.30 1 d PR . . 
H9C H 0.7072 0.7820 0.0243 0.044 Uiso 0.30 1 d PR . . 
O10 O 0.5399(5) 0.3534(5) 0.9751(4) 0.0380(18) Uani 0.30 1 d P . . 
H10A H 0.5827 0.3868 1.0054 0.057 Uiso 0.30 1 d PR . . 
H10C H 0.5424 0.2964 0.9717 0.057 Uiso 0.30 1 d PR . . 
O11 O 0.8884(4) 0.7258(4) 0.3531(3) 0.0333(12) Uani 0.40 1 d P . . 
H11A H 0.9450 0.7544 0.3624 0.050 Uiso 0.40 1 d PR . . 
H11B H 0.8849 0.6815 0.3174 0.050 Uiso 0.40 1 d PR . . 
O12 O 0.0691(5) 0.9055(5) 0.6045(4) 0.0399(18) Uani 0.30 1 d P . . 
H12A H 0.0479 0.9387 0.5784 0.060 Uiso 0.30 1 d PR . . 
H12C H 0.0787 0.9347 0.6479 0.060 Uiso 0.30 1 d PR . . 
O13 O 0.0789(5) 0.8726(5) 0.3927(4) 0.0326(16) Uani 0.30 1 d P . . 
H13A H 0.0275 0.8790 0.3744 0.049 Uiso 0.30 1 d PR . . 
H13B H 0.1234 0.9134 0.3819 0.049 Uiso 0.30 1 d PR . . 
S1 S 0.67847(6) 1.03671(6) 0.68257(5) 0.03958(19) Uani 1 1 d . . . 
S2 S 0.53348(6) 1.03506(6) 0.78623(5) 0.0440(2) Uani 1 1 d . . . 
S3 S 0.83206(6) 1.13774(6) 0.79392(5) 0.0393(2) Uani 1 1 d . . . 
S4 S 0.66805(6) 1.13453(6) 0.91137(5) 0.0425(2) Uani 1 1 d . . . 
S5 S 0.40860(6) 0.86867(6) 0.89081(5) 0.0441(2) Uani 1 1 d . . . 
S6 S 0.28804(6) 0.68256(6) 0.86330(5) 0.0441(2) Uani 1 1 d . . . 
S7 S 0.11384(6) 0.75245(6) 0.88985(5) 0.0460(2) Uani 1 1 d . . . 
S8 S 0.25007(6) 0.96547(6) 0.92009(5) 0.03851(19) Uani 1 1 d . . . 
 
loop_ 
 _atom_site_aniso_label 
 _atom_site_aniso_U_11 
 _atom_site_aniso_U_22 
 _atom_site_aniso_U_33 
 _atom_site_aniso_U_23 
 _atom_site_aniso_U_13 
 _atom_site_aniso_U_12 
B1 0.039(2) 0.041(2) 0.040(2) 0.0047(17) -0.0119(17) 0.0119(17) 
C1 0.045(2) 0.0395(18) 0.042(2) 0.0067(15) -0.0104(16) 0.0095(15) 
C2 0.043(2) 0.057(2) 0.040(2) 0.0155(17) -0.0153(16) 0.0096(17) 
C3 0.049(2) 0.051(2) 0.0304(18) 0.0115(15) -0.0059(15) 0.0172(17) 
C4 0.047(2) 0.052(2) 0.040(2) -0.0140(16) -0.0143(16) 0.0211(17) 
C5 0.045(2) 0.046(2) 0.042(2) -0.0197(16) -0.0160(16) 0.0159(16) 
C6 0.0412(19) 0.0349(18) 0.044(2) -0.0176(15) -0.0129(15) 0.0137(15) 
C7 0.043(2) 0.0342(18) 0.055(2) -0.0083(16) -0.0044(17) 0.0131(15) 
C8 0.0364(18) 0.0299(17) 0.046(2) -0.0112(14) 0.0028(15) 0.0045(13) 
C9 0.0420(19) 0.0359(18) 0.044(2) -0.0104(15) 0.0027(15) 0.0133(15) 
C10 0.0341(17) 0.0262(16) 0.049(2) -0.0107(14) -0.0019(15) 0.0083(13) 
C11 0.046(2) 0.0346(18) 0.0398(19) -0.0016(15) 0.0039(15) 0.0098(15) 
C12 0.0318(17) 0.0294(16) 0.0416(19) -0.0087(13) -0.0056(14) 0.0119(13) 
C13 0.046(2) 0.0358(18) 0.043(2) 0.0031(15) 0.0044(16) 0.0117(15) 
C14 0.0344(18) 0.0370(18) 0.054(2) 0.0076(16) 0.0137(16) 0.0149(14) 
C15 0.0291(17) 0.0321(17) 0.051(2) 0.0065(15) 0.0154(15) -0.0021(13) 
C16 0.0427(19) 0.0395(18) 0.0340(18) 0.0027(14) -0.0019(14) 0.0161(15) 
C17 0.0424(19) 0.0416(18) 0.0319(17) 0.0005(14) -0.0029(14) 0.0161(15) 
C18 0.0359(18) 0.0379(18) 0.0406(19) -0.0110(15) -0.0002(15) 0.0087(14) 
C19 0.0378(18) 0.0337(17) 0.0361(18) -0.0078(14) 0.0025(14) 0.0139(14) 
C20 0.045(2) 0.0400(19) 0.042(2) -0.0077(15) 0.0008(16) 0.0139(15) 
C21 0.0375(18) 0.0325(17) 0.0415(19) -0.0112(14) -0.0055(14) 0.0151(14) 
C22 0.0368(18) 0.0367(17) 0.0322(17) -0.0100(14) -0.0033(13) 0.0137(14) 
C23 0.0360(18) 0.0414(18) 0.0328(17) -0.0049(14) -0.0055(14) 0.0130(14) 
C24 0.050(2) 0.0356(17) 0.0195(15) 0.0051(12) -0.0019(13) 0.0078(14) 
C25 0.0407(18) 0.0370(17) 0.0327(17) 0.0064(13) -0.0105(14) 0.0145(14) 
C26 0.0395(18) 0.0305(16) 0.0386(18) 0.0005(14) -0.0083(14) 0.0116(13) 
C27 0.0381(18) 0.0442(19) 0.0355(18) 0.0151(15) -0.0125(15) 0.0092(15) 
C28 0.0346(18) 0.0369(17) 0.0363(18) 0.0047(14) -0.0157(14) 0.0031(14) 
C29 0.0367(18) 0.047(2) 0.044(2) 0.0015(16) -0.0063(15) 0.0095(15) 
C30 0.048(2) 0.050(2) 0.036(2) 0.0041(16) -0.0114(16) -0.0089(17) 
C31 0.050(2) 0.043(2) 0.047(2) 0.0124(17) -0.0080(17) -0.0090(17) 
C32 0.0392(19) 0.0352(18) 0.049(2) 0.0022(15) -0.0096(16) 0.0068(14) 
C33 0.0344(19) 0.046(2) 0.046(2) -0.0051(16) -0.0087(15) -0.0029(15) 
C34 0.042(2) 0.0377(18) 0.0398(19) 0.0068(15) -0.0077(15) 0.0052(15) 
C35 0.0347(17) 0.0380(17) 0.0339(17) 0.0009(14) -0.0122(13) 0.0113(14) 
C36 0.046(2) 0.0413(19) 0.044(2) -0.0153(16) -0.0070(16) 0.0129(16) 
C37 0.041(2) 0.051(2) 0.040(2) -0.0125(16) -0.0127(16) 0.0079(17) 
C38 0.0323(18) 0.0400(18) 0.049(2) -0.0211(15) -0.0131(15) 0.0196(15) 
C39 0.0326(17) 0.0371(17) 0.0411(19) -0.0126(14) -0.0088(14) 0.0165(14) 
C40 0.0293(17) 0.0375(17) 0.0433(19) -0.0012(14) 0.0162(14) 0.0090(13) 
C41 0.043(2) 0.046(2) 0.0367(19) 0.0061(15) 0.0077(15) 0.0087(16) 
C42 0.0409(19) 0.0324(17) 0.043(2) 0.0070(14) 0.0036(15) 0.0097(14) 
C43 0.0308(17) 0.0391(18) 0.045(2) 0.0023(15) 0.0117(15) 0.0071(14) 
C44 0.0369(18) 0.0361(17) 0.0354(18) 0.0011(14) -0.0064(14) 0.0157(14) 
C45 0.0328(18) 0.047(2) 0.0375(19) -0.0051(15) -0.0039(14) 0.0158(15) 
C46 0.0353(18) 0.0361(18) 0.0375(19) -0.0107(14) -0.0055(14) 0.0010(14) 
C47 0.0364(18) 0.0396(18) 0.0215(15) -0.0121(13) -0.0008(13) -0.0017(14) 
C48 0.0361(18) 0.0400(19) 0.0348(18) -0.0084(15) 0.0088(14) -0.0013(14) 
C49 0.0316(17) 0.0282(16) 0.0368(18) 0.0031(13) 0.0006(13) 0.0001(13) 
C50 0.0294(16) 0.0295(16) 0.0371(18) -0.0040(13) -0.0021(13) 0.0030(13) 
C51 0.0372(19) 0.046(2) 0.0364(19) -0.0030(15) -0.0036(15) 0.0090(15) 
C52 0.0420(19) 0.0442(19) 0.0350(18) 0.0067(15) 0.0027(15) 0.0103(15) 
C53 0.0357(19) 0.045(2) 0.045(2) 0.0006(16) 0.0084(15) 0.0115(15) 
C54 0.046(2) 0.043(2) 0.040(2) 0.0072(15) 0.0086(16) 0.0163(16) 
C55 0.042(2) 0.0383(19) 0.053(2) 0.0036(16) 0.0089(17) 0.0139(15) 
C56 0.0330(17) 0.0421(19) 0.0421(19) 0.0085(15) 0.0032(14) 0.0177(14) 
Cl1 0.0452(5) 0.0393(4) 0.0445(5) 0.0209(4) 0.0141(4) 0.0097(4) 
Fe1 0.0314(2) 0.0289(2) 0.0320(2) -0.00659(18) -0.00887(19) 0.01543(18) 
N1 0.0391(16) 0.0394(16) 0.0428(17) 0.0061(13) -0.0106(13) 0.0101(13) 
N2 0.0394(16) 0.0478(17) 0.0406(17) 0.0056(13) -0.0034(13) 0.0153(13) 
N3 0.0318(15) 0.0398(15) 0.0402(16) -0.0064(12) -0.0092(12) 0.0116(12) 
N4 0.0463(17) 0.0410(16) 0.0459(17) -0.0154(13) -0.0197(14) 0.0182(13) 
N5 0.0389(16) 0.0368(15) 0.0385(16) -0.0043(12) -0.0098(12) 0.0161(12) 
N6 0.0360(15) 0.0457(16) 0.0350(15) -0.0096(12) -0.0090(12) 0.0177(13) 
N7 0.0307(14) 0.0432(16) 0.0379(15) -0.0082(12) -0.0062(12) 0.0123(12) 
N8 0.0450(17) 0.0469(17) 0.0404(17) 0.0027(13) 0.0086(13) 0.0146(14) 
N9 0.0439(17) 0.0409(16) 0.0415(17) -0.0143(13) -0.0099(13) 0.0148(13) 
N10 0.0386(16) 0.0384(15) 0.0379(16) -0.0020(12) -0.0039(12) 0.0176(12) 
N11 0.0365(15) 0.0320(14) 0.0468(17) -0.0105(12) 0.0000(13) 0.0149(12) 
N12 0.0421(16) 0.0436(16) 0.0375(16) 0.0084(13) -0.0114(13) 0.0097(13) 
N13 0.0357(16) 0.0441(17) 0.056(2) 0.0026(14) -0.0111(14) 0.0042(13) 
N14 0.0377(16) 0.0361(15) 0.0386(16) -0.0063(12) -0.0075(12) 0.0087(12) 
N15 0.0331(15) 0.0381(15) 0.0395(16) -0.0054(12) -0.0060(12) 0.0069(12) 
N16 0.0449(17) 0.0441(17) 0.0358(16) -0.0059(13) -0.0067(13) -0.0044(13) 
N17 0.0339(15) 0.0427(16) 0.0377(16) 0.0032(13) -0.0018(12) -0.0058(12) 
Ni1 0.0295(2) 0.0323(2) 0.0342(2) -0.00820(17) -0.00623(17) 0.01225(16) 
O1 0.0474(14) 0.0430(13) 0.0384(13) 0.0152(10) 0.0154(11) 0.0119(11) 
O2 0.0530(15) 0.0450(14) 0.0455(14) 0.0223(11) 0.0163(12) 0.0164(11) 
O3 0.0464(15) 0.0439(14) 0.0485(15) -0.0013(11) 0.0010(12) 0.0125(11) 
O4 0.0388(13) 0.0401(13) 0.0429(13) 0.0156(10) 0.0109(10) 0.0130(10) 
O5 0.020(2) 0.030(3) 0.022(2) 0.005(2) 0.0070(19) -0.0058(19) 
O6 0.031(3) 0.023(3) 0.018(3) 0.010(2) 0.012(3) 0.023(3) 
O7 0.007(3) 0.030(3) 0.019(3) -0.006(2) -0.006(2) -0.002(2) 
O8 0.029(3) 0.035(3) 0.021(2) 0.023(2) 0.013(2) 0.013(2) 
O9 0.031(4) 0.031(4) 0.034(4) 0.016(3) 0.012(3) 0.012(3) 
O10 0.055(5) 0.033(4) 0.039(4) 0.031(3) 0.018(4) 0.018(3) 
O11 0.031(3) 0.032(3) 0.035(3) 0.000(2) 0.002(2) 0.006(2) 
O12 0.054(5) 0.043(4) 0.037(4) 0.029(4) 0.022(4) 0.022(4) 
O13 0.029(4) 0.030(4) 0.037(4) 0.007(3) 0.008(3) 0.000(3) 
S1 0.0404(5) 0.0379(4) 0.0373(5) 0.0024(4) -0.0050(4) 0.0057(4) 
S2 0.0424(5) 0.0406(5) 0.0403(5) -0.0160(4) 0.0030(4) 0.0086(4) 
S3 0.0379(5) 0.0412(5) 0.0375(5) 0.0141(4) -0.0112(4) 0.0016(4) 
S4 0.0413(5) 0.0399(5) 0.0411(5) -0.0027(4) -0.0089(4) 0.0065(4) 
S5 0.0403(5) 0.0387(5) 0.0415(5) -0.0149(4) 0.0115(4) -0.0006(4) 
S6 0.0423(5) 0.0393(5) 0.0409(5) -0.0107(4) 0.0128(4) -0.0002(4) 
S7 0.0388(5) 0.0396(5) 0.0429(5) -0.0188(4) 0.0051(4) -0.0078(4) 
S8 0.0387(5) 0.0402(4) 0.0358(4) 0.0055(4) 0.0132(4) 0.0065(4) 
 
_geom_special_details 
; 
 All esds (except the esd in the dihedral angle between two l.s. planes) 
 are estimated using the full covariance matrix.  The cell esds are taken 
 into account individually in the estimation of esds in distances, angles 
 and torsion angles; correlations between esds in cell parameters are only 
 used when they are defined by crystal symmetry.  An approximate (isotropic) 
 treatment of cell esds is used for estimating esds involving l.s. planes. 
; 
 
loop_ 
 _geom_bond_atom_site_label_1 
 _geom_bond_atom_site_label_2 
 _geom_bond_distance 
 _geom_bond_site_symmetry_2 
 _geom_bond_publ_flag 
B1 N5 1.493(4) . ? 
B1 N3 1.502(4) . ? 
B1 N1 1.542(4) . ? 
B1 H20A 0.9800 . ? 
C1 N1 1.339(4) . ? 
C1 C2 1.348(5) . ? 
C1 H1 0.9300 . ? 
C2 C3 1.424(5) . ? 
C2 H2 0.9300 . ? 
C3 N2 1.334(4) . ? 
C3 H3 0.9300 . ? 
C4 C5 1.342(5) . ? 
C4 N3 1.376(3) . ? 
C4 H4 0.9300 . ? 
C5 C6 1.400(5) . ? 
C5 H5 0.9300 . ? 
C6 N4 1.323(3) . ? 
C6 H6 0.9300 . ? 
C7 C8 1.368(5) . ? 
C7 N5 1.385(3) . ? 
C7 H7 0.9300 . ? 
C8 C9 1.378(5) . ? 
C8 H8 0.9300 . ? 
C9 N6 1.319(3) . ? 
C9 H9 0.9300 . ? 
C10 N7 1.146(3) . ? 
C10 Fe1 1.904(3) . ? 
C11 N8 1.111(4) . ? 
C11 Fe1 1.935(4) . ? 
C12 N9 1.151(3) . ? 
C12 Fe1 1.900(3) . ? 
C13 N10 1.295(3) . ? 
C13 C14 1.408(5) . ? 
C13 H13 0.9300 . ? 
C14 C15 1.373(4) . ? 
C14 H14 0.9300 . ? 
C15 C16 1.392(4) . ? 
C15 H15 0.9300 . ? 
C16 C17 1.378(5) . ? 
C16 H16 0.9300 . ? 
C17 N10 1.316(3) . ? 
C17 C23 1.487(4) . ? 
C18 N11 1.343(3) . ? 
C18 C19 1.367(4) . ? 
C18 H18 0.9300 . ? 
C19 C20 1.435(5) . ? 
C19 H19 0.9300 . ? 
C20 C21 1.351(5) . ? 
C20 H20 0.9300 . ? 
C21 C22 1.409(4) . ? 
C21 H21 0.9300 . ? 
C22 N11 1.344(3) . ? 
C22 C23 1.450(5) . ? 
C23 C24 1.348(4) . ? 
C24 S1 1.761(3) . ? 
C24 S2 1.764(3) . ? 
C25 C26 1.326(5) . ? 
C25 S3 1.732(3) . ? 
C25 S1 1.763(3) . ? 
C26 S2 1.733(3) . ? 
C26 S4 1.759(3) . ? 
C27 C28 1.368(5) . ? 
C27 N12 1.376(3) . ? 
C27 S3 1.744(3) . ? 
C28 N13 1.335(3) . ? 
C28 S4 1.739(3) . ? 
C29 N12 1.365(4) . ? 
C29 C30 1.382(5) . ? 
C29 C34 1.398(5) . ? 
C30 C31 1.405(5) . ? 
C30 H30 0.9300 . ? 
C31 C32 1.384(5) . ? 
C31 H31 0.9300 . ? 
C32 C33 1.389(5) . ? 
C32 H32 0.9300 . ? 
C33 C34 1.382(5) . ? 
C33 H33 0.9300 . ? 
C34 N13 1.380(3) . ? 
C35 N14 1.323(3) . ? 
C35 C36 1.360(4) . ? 
C35 H35 0.9300 . ? 
C36 C37 1.343(5) . ? 
C36 H36 0.9300 . ? 
C37 C38 1.332(5) . ? 
C37 H37 0.9300 . ? 
C38 C39 1.358(4) . ? 
C38 H38 0.9300 . ? 
C39 N14 1.378(3) . ? 
C39 C45 1.492(4) . ? 
C40 N15 1.293(3) . ? 
C40 C41 1.328(4) . ? 
C40 H40 0.9300 . ? 
C41 C42 1.354(5) . ? 
C41 H41 0.9300 . ? 
C42 C43 1.378(4) . ? 
C42 H42 0.9300 . ? 
C43 C44 1.364(5) . ? 
C43 H43 0.9300 . ? 
C44 N15 1.346(4) . ? 
C44 C45 1.502(4) . ? 
C45 C46 1.303(5) . ? 
C46 S6 1.756(3) . ? 
C46 S5 1.778(3) . ? 
C47 C48 1.320(4) . ? 
C47 S8 1.752(3) . ? 
C47 S5 1.758(3) . ? 
C48 S7 1.726(3) . ? 
C48 S6 1.752(4) . ? 
C49 C50 1.391(4) . ? 
C49 N16 1.401(4) . ? 
C49 S8 1.706(3) . ? 
C50 N17 1.338(4) . ? 
C50 S7 1.722(3) . ? 
C51 N16 1.353(5) . ? 
C51 C56 1.398(5) . ? 
C51 C52 1.401(5) . ? 
C52 C53 1.381(5) . ? 
C52 H52 0.9300 . ? 
C53 C54 1.387(5) . ? 
C53 H53 0.9300 . ? 
C54 C55 1.396(5) . ? 
C54 H54 0.9300 . ? 
C55 C56 1.381(5) . ? 
C55 H55 0.9300 . ? 
C56 N17 1.369(4) . ? 
Cl1 O4 1.408(2) . ? 
Cl1 O1 1.435(2) . ? 
Cl1 O3 1.436(3) . ? 
Cl1 O2 1.437(2) . ? 
Fe1 N6 1.958(3) . ? 
Fe1 N2 1.964(3) . ? 
Fe1 N4 1.982(3) . ? 
N1 N2 1.355(4) . ? 
N3 N4 1.361(4) . ? 
N5 N6 1.420(4) . ? 
N7 Ni1 2.078(3) 2_666 ? 
N9 Ni1 2.069(3) . ? 
N10 Ni1 2.136(3) . ? 
N11 Ni1 2.123(3) . ? 
N14 Ni1 2.123(3) . ? 
N15 Ni1 2.128(3) . ? 
Ni1 N7 2.078(3) 2_666 ? 
O5 H5D 0.8500 . ? 
O5 H5B 0.8501 . ? 
O6 H6A 0.8501 . ? 
O6 H6C 0.8500 . ? 
O7 H7A 0.8499 . ? 
O7 H7C 0.8500 . ? 
O8 H8A 0.8500 . ? 
O8 H8C 0.8500 . ? 
O9 H9B 0.8499 . ? 
O9 H9C 0.8500 . ? 
O10 H10A 0.8500 . ? 
O10 H10C 0.8499 . ? 
O11 H11A 0.8500 . ? 
O11 H11B 0.8500 . ? 
O12 H12A 0.8501 . ? 
O12 H12C 0.8499 . ? 
O13 H13A 0.8499 . ? 
O13 H13B 0.8500 . ? 
 
loop_ 
 _geom_angle_atom_site_label_1 
 _geom_angle_atom_site_label_2 
 _geom_angle_atom_site_label_3 
 _geom_angle 
 _geom_angle_site_symmetry_1 
 _geom_angle_site_symmetry_3 
 _geom_angle_publ_flag 
N5 B1 N3 107.5(3) . . ? 
N5 B1 N1 107.7(2) . . ? 
N3 B1 N1 106.1(2) . . ? 
N5 B1 H20A 111.8 . . ? 
N3 B1 H20A 111.8 . . ? 
N1 B1 H20A 111.8 . . ? 
N1 C1 C2 108.6(3) . . ? 
N1 C1 H1 125.7 . . ? 
C2 C1 H1 125.7 . . ? 
C1 C2 C3 105.7(3) . . ? 
C1 C2 H2 127.2 . . ? 
C3 C2 H2 127.2 . . ? 
N2 C3 C2 108.4(3) . . ? 
N2 C3 H3 125.8 . . ? 
C2 C3 H3 125.8 . . ? 
C5 C4 N3 107.9(3) . . ? 
C5 C4 H4 126.1 . . ? 
N3 C4 H4 126.1 . . ? 
C4 C5 C6 108.2(3) . . ? 
C4 C5 H5 125.9 . . ? 
C6 C5 H5 125.9 . . ? 
N4 C6 C5 106.7(3) . . ? 
N4 C6 H6 126.6 . . ? 
C5 C6 H6 126.6 . . ? 
C8 C7 N5 107.9(3) . . ? 
C8 C7 H7 126.1 . . ? 
N5 C7 H7 126.1 . . ? 
C7 C8 C9 108.1(3) . . ? 
C7 C8 H8 126.0 . . ? 
C9 C8 H8 126.0 . . ? 
N6 C9 C8 109.5(3) . . ? 
N6 C9 H9 125.2 . . ? 
C8 C9 H9 125.2 . . ? 
N7 C10 Fe1 178.1(3) . . ? 
N8 C11 Fe1 179.2(3) . . ? 
N9 C12 Fe1 178.6(2) . . ? 
N10 C13 C14 123.1(3) . . ? 
N10 C13 H13 118.5 . . ? 
C14 C13 H13 118.5 . . ? 
C15 C14 C13 117.3(3) . . ? 
C15 C14 H14 121.4 . . ? 
C13 C14 H14 121.4 . . ? 
C14 C15 C16 119.2(3) . . ? 
C14 C15 H15 120.4 . . ? 
C16 C15 H15 120.4 . . ? 
C17 C16 C15 117.9(3) . . ? 
C17 C16 H16 121.1 . . ? 
C15 C16 H16 121.1 . . ? 
N10 C17 C16 123.0(3) . . ? 
N10 C17 C23 118.3(3) . . ? 
C16 C17 C23 118.7(3) . . ? 
N11 C18 C19 122.5(3) . . ? 
N11 C18 H18 118.7 . . ? 
C19 C18 H18 118.7 . . ? 
C18 C19 C20 117.7(3) . . ? 
C18 C19 H19 121.1 . . ? 
C20 C19 H19 121.1 . . ? 
C21 C20 C19 118.6(3) . . ? 
C21 C20 H20 120.7 . . ? 
C19 C20 H20 120.7 . . ? 
C20 C21 C22 121.3(3) . . ? 
C20 C21 H21 119.4 . . ? 
C22 C21 H21 119.4 . . ? 
N11 C22 C21 118.9(3) . . ? 
N11 C22 C23 119.8(3) . . ? 
C21 C22 C23 121.0(3) . . ? 
C24 C23 C22 121.5(3) . . ? 
C24 C23 C17 120.0(3) . . ? 
C22 C23 C17 118.5(3) . . ? 
C23 C24 S1 123.6(3) . . ? 
C23 C24 S2 124.5(3) . . ? 
S1 C24 S2 111.91(17) . . ? 
C26 C25 S3 126.3(3) . . ? 
C26 C25 S1 115.4(3) . . ? 
S3 C25 S1 118.3(2) . . ? 
C25 C26 S2 118.9(3) . . ? 
C25 C26 S4 122.8(3) . . ? 
S2 C26 S4 118.2(2) . . ? 
C28 C27 N12 120.0(3) . . ? 
C28 C27 S3 124.6(3) . . ? 
N12 C27 S3 115.2(2) . . ? 
N13 C28 C27 126.0(3) . . ? 
N13 C28 S4 110.8(2) . . ? 
C27 C28 S4 123.0(3) . . ? 
N12 C29 C30 120.1(3) . . ? 
N12 C29 C34 120.0(3) . . ? 
C30 C29 C34 119.9(3) . . ? 
C29 C30 C31 119.6(4) . . ? 
C29 C30 H30 120.2 . . ? 
C31 C30 H30 120.2 . . ? 
C32 C31 C30 120.4(3) . . ? 
C32 C31 H31 119.8 . . ? 
C30 C31 H31 119.8 . . ? 
C31 C32 C33 119.5(3) . . ? 
C31 C32 H32 120.3 . . ? 
C33 C32 H32 120.3 . . ? 
C34 C33 C32 120.6(4) . . ? 
C34 C33 H33 119.7 . . ? 
C32 C33 H33 119.7 . . ? 
N13 C34 C33 116.3(3) . . ? 
N13 C34 C29 123.6(3) . . ? 
C33 C34 C29 120.0(3) . . ? 
N14 C35 C36 122.2(3) . . ? 
N14 C35 H35 118.9 . . ? 
C36 C35 H35 118.9 . . ? 
C37 C36 C35 115.7(4) . . ? 
C37 C36 H36 122.2 . . ? 
C35 C36 H36 122.2 . . ? 
C38 C37 C36 125.2(3) . . ? 
C38 C37 H37 117.4 . . ? 
C36 C37 H37 117.4 . . ? 
C37 C38 C39 117.1(3) . . ? 
C37 C38 H38 121.4 . . ? 
C39 C38 H38 121.4 . . ? 
C38 C39 N14 119.8(3) . . ? 
C38 C39 C45 123.1(3) . . ? 
N14 C39 C45 117.1(2) . . ? 
N15 C40 C41 124.7(3) . . ? 
N15 C40 H40 117.7 . . ? 
C41 C40 H40 117.7 . . ? 
C40 C41 C42 119.1(3) . . ? 
C40 C41 H41 120.5 . . ? 
C42 C41 H41 120.5 . . ? 
C41 C42 C43 118.5(3) . . ? 
C41 C42 H42 120.7 . . ? 
C43 C42 H42 120.7 . . ? 
C44 C43 C42 118.4(3) . . ? 
C44 C43 H43 120.8 . . ? 
C42 C43 H43 120.8 . . ? 
N15 C44 C43 121.7(3) . . ? 
N15 C44 C45 117.7(3) . . ? 
C43 C44 C45 120.6(3) . . ? 
C46 C45 C39 122.6(3) . . ? 
C46 C45 C44 120.7(3) . . ? 
C39 C45 C44 116.4(2) . . ? 
C45 C46 S6 122.4(3) . . ? 
C45 C46 S5 126.0(3) . . ? 
S6 C46 S5 111.50(19) . . ? 
C48 C47 S8 125.5(3) . . ? 
C48 C47 S5 117.2(3) . . ? 
S8 C47 S5 117.30(18) . . ? 
C47 C48 S7 125.3(3) . . ? 
C47 C48 S6 117.0(3) . . ? 
S7 C48 S6 117.70(19) . . ? 
C50 C49 N16 119.1(3) . . ? 
C50 C49 S8 126.2(3) . . ? 
N16 C49 S8 114.7(2) . . ? 
N17 C50 C49 120.2(3) . . ? 
N17 C50 S7 116.5(2) . . ? 
C49 C50 S7 122.6(3) . . ? 
N16 C51 C56 120.5(3) . . ? 
N16 C51 C52 119.6(3) . . ? 
C56 C51 C52 119.9(3) . . ? 
C53 C52 C51 119.9(3) . . ? 
C53 C52 H52 120.0 . . ? 
C51 C52 H52 120.0 . . ? 
C52 C53 C54 120.3(3) . . ? 
C52 C53 H53 119.9 . . ? 
C54 C53 H53 119.9 . . ? 
C53 C54 C55 119.8(3) . . ? 
C53 C54 H54 120.1 . . ? 
C55 C54 H54 120.1 . . ? 
C56 C55 C54 120.6(3) . . ? 
C56 C55 H55 119.7 . . ? 
C54 C55 H55 119.7 . . ? 
N17 C56 C55 121.7(3) . . ? 
N17 C56 C51 118.8(3) . . ? 
C55 C56 C51 119.5(3) . . ? 
O4 Cl1 O1 112.16(14) . . ? 
O4 Cl1 O3 108.83(15) . . ? 
O1 Cl1 O3 108.56(15) . . ? 
O4 Cl1 O2 110.35(15) . . ? 
O1 Cl1 O2 110.04(14) . . ? 
O3 Cl1 O2 106.72(16) . . ? 
C12 Fe1 C10 87.10(13) . . ? 
C12 Fe1 C11 88.10(15) . . ? 
C10 Fe1 C11 85.89(15) . . ? 
C12 Fe1 N6 91.79(9) . . ? 
C10 Fe1 N6 176.30(11) . . ? 
C11 Fe1 N6 90.55(10) . . ? 
C12 Fe1 N2 90.93(11) . . ? 
C10 Fe1 N2 93.25(11) . . ? 
C11 Fe1 N2 178.73(11) . . ? 
N6 Fe1 N2 90.30(13) . . ? 
C12 Fe1 N4 178.89(11) . . ? 
C10 Fe1 N4 92.63(10) . . ? 
C11 Fe1 N4 92.95(10) . . ? 
N6 Fe1 N4 88.55(12) . . ? 
N2 Fe1 N4 88.01(13) . . ? 
C1 N1 N2 110.2(2) . . ? 
C1 N1 B1 131.0(2) . . ? 
N2 N1 B1 118.8(2) . . ? 
C3 N2 N1 107.1(2) . . ? 
C3 N2 Fe1 133.38(19) . . ? 
N1 N2 Fe1 119.4(2) . . ? 
N4 N3 C4 107.0(2) . . ? 
N4 N3 B1 120.3(2) . . ? 
C4 N3 B1 132.7(2) . . ? 
C6 N4 N3 110.2(2) . . ? 
C6 N4 Fe1 131.77(19) . . ? 
N3 N4 Fe1 118.0(2) . . ? 
C7 N5 N6 106.2(2) . . ? 
C7 N5 B1 134.1(2) . . ? 
N6 N5 B1 119.6(2) . . ? 
C9 N6 N5 108.3(2) . . ? 
C9 N6 Fe1 134.50(19) . . ? 
N5 N6 Fe1 117.2(2) . . ? 
C10 N7 Ni1 176.0(2) . 2_666 ? 
C12 N9 Ni1 176.6(2) . . ? 
C13 N10 C17 119.3(2) . . ? 
C13 N10 Ni1 117.25(17) . . ? 
C17 N10 Ni1 123.36(17) . . ? 
C18 N11 C22 121.0(2) . . ? 
C18 N11 Ni1 117.39(16) . . ? 
C22 N11 Ni1 121.64(17) . . ? 
C29 N12 C27 117.1(2) . . ? 
C28 N13 C34 113.3(2) . . ? 
C35 N14 C39 119.61(19) . . ? 
C35 N14 Ni1 118.94(18) . . ? 
C39 N14 Ni1 121.26(17) . . ? 
C40 N15 C44 117.5(3) . . ? 
C40 N15 Ni1 120.41(18) . . ? 
C44 N15 Ni1 121.3(2) . . ? 
C51 N16 C49 119.7(3) . . ? 
C50 N17 C56 121.6(3) . . ? 
N9 Ni1 N7 93.16(11) . 2_666 ? 
N9 Ni1 N14 177.14(13) . . ? 
N7 Ni1 N14 88.17(10) 2_666 . ? 
N9 Ni1 N11 88.59(11) . . ? 
N7 Ni1 N11 175.51(12) 2_666 . ? 
N14 Ni1 N11 90.26(11) . . ? 
N9 Ni1 N15 90.26(12) . . ? 
N7 Ni1 N15 88.04(11) 2_666 . ? 
N14 Ni1 N15 87.26(11) . . ? 
N11 Ni1 N15 96.09(11) . . ? 
N9 Ni1 N10 88.50(12) . . ? 
N7 Ni1 N10 90.51(11) 2_666 . ? 
N14 Ni1 N10 94.02(11) . . ? 
N11 Ni1 N10 85.40(11) . . ? 
N15 Ni1 N10 178.03(10) . . ? 
H5D O5 H5B 109.5 . . ? 
H6A O6 H6C 109.5 . . ? 
H7A O7 H7C 109.5 . . ? 
H8A O8 H8C 109.5 . . ? 
H9B O9 H9C 109.5 . . ? 
H10A O10 H10C 109.5 . . ? 
H11A O11 H11B 109.5 . . ? 
H12A O12 H12C 109.5 . . ? 
H13A O13 H13B 109.5 . . ? 
C24 S1 C25 94.94(15) . . ? 
C26 S2 C24 94.18(16) . . ? 
C25 S3 C27 96.38(15) . . ? 
C28 S4 C26 98.03(16) . . ? 
C47 S5 C46 94.82(15) . . ? 
C48 S6 C46 95.59(16) . . ? 
C50 S7 C48 98.44(15) . . ? 
C49 S8 C47 98.53(16) . . ? 
 
loop_ 
 _geom_torsion_atom_site_label_1 
 _geom_torsion_atom_site_label_2 
 _geom_torsion_atom_site_label_3 
 _geom_torsion_atom_site_label_4 
 _geom_torsion 
 _geom_torsion_site_symmetry_1 
 _geom_torsion_site_symmetry_2 
 _geom_torsion_site_symmetry_3 
 _geom_torsion_site_symmetry_4 
 _geom_torsion_publ_flag 
N1 C1 C2 C3 0.7(4) . . . . ? 
C1 C2 C3 N2 0.2(4) . . . . ? 
N3 C4 C5 C6 -1.2(4) . . . . ? 
C4 C5 C6 N4 0.1(4) . . . . ? 
N5 C7 C8 C9 -1.4(4) . . . . ? 
C7 C8 C9 N6 1.2(4) . . . . ? 
N10 C13 C14 C15 4.3(5) . . . . ? 
C13 C14 C15 C16 -5.2(5) . . . . ? 
C14 C15 C16 C17 5.0(5) . . . . ? 
C15 C16 C17 N10 -3.7(5) . . . . ? 
C15 C16 C17 C23 178.9(3) . . . . ? 
N11 C18 C19 C20 0.5(5) . . . . ? 
C18 C19 C20 C21 1.5(5) . . . . ? 
C19 C20 C21 C22 -3.0(5) . . . . ? 
C20 C21 C22 N11 2.4(5) . . . . ? 
C20 C21 C22 C23 176.1(3) . . . . ? 
N11 C22 C23 C24 -132.9(3) . . . . ? 
C21 C22 C23 C24 53.5(5) . . . . ? 
N11 C22 C23 C17 47.8(4) . . . . ? 
C21 C22 C23 C17 -125.9(3) . . . . ? 
N10 C17 C23 C24 126.3(3) . . . . ? 
C16 C17 C23 C24 -56.2(5) . . . . ? 
N10 C17 C23 C22 -54.3(4) . . . . ? 
C16 C17 C23 C22 123.2(4) . . . . ? 
C22 C23 C24 S1 179.0(3) . . . . ? 
C17 C23 C24 S1 -1.7(5) . . . . ? 
C22 C23 C24 S2 -1.0(5) . . . . ? 
C17 C23 C24 S2 178.3(2) . . . . ? 
S3 C25 C26 S2 178.39(18) . . . . ? 
S1 C25 C26 S2 -1.5(4) . . . . ? 
S3 C25 C26 S4 1.0(4) . . . . ? 
S1 C25 C26 S4 -178.95(17) . . . . ? 
N12 C27 C28 N13 -1.0(4) . . . . ? 
S3 C27 C28 N13 173.5(2) . . . . ? 
N12 C27 C28 S4 -176.08(19) . . . . ? 
S3 C27 C28 S4 -1.6(4) . . . . ? 
N12 C29 C30 C31 177.4(3) . . . . ? 
C34 C29 C30 C31 -0.3(6) . . . . ? 
C29 C30 C31 C32 0.0(6) . . . . ? 
C30 C31 C32 C33 0.1(6) . . . . ? 
C31 C32 C33 C34 0.1(5) . . . . ? 
C32 C33 C34 N13 -177.6(3) . . . . ? 
C32 C33 C34 C29 -0.4(5) . . . . ? 
N12 C29 C34 N13 -0.2(5) . . . . ? 
C30 C29 C34 N13 177.5(3) . . . . ? 
N12 C29 C34 C33 -177.2(3) . . . . ? 
C30 C29 C34 C33 0.5(5) . . . . ? 
N14 C35 C36 C37 -3.6(5) . . . . ? 
C35 C36 C37 C38 6.6(6) . . . . ? 
C36 C37 C38 C39 -5.0(6) . . . . ? 
C37 C38 C39 N14 0.5(5) . . . . ? 
C37 C38 C39 C45 178.2(3) . . . . ? 
N15 C40 C41 C42 -4.3(4) . . . . ? 
C40 C41 C42 C43 3.9(5) . . . . ? 
C41 C42 C43 C44 -2.1(5) . . . . ? 
C42 C43 C44 N15 0.5(5) . . . . ? 
C42 C43 C44 C45 177.0(3) . . . . ? 
C38 C39 C45 C46 46.5(4) . . . . ? 
N14 C39 C45 C46 -135.7(3) . . . . ? 
C38 C39 C45 C44 -127.5(3) . . . . ? 
N14 C39 C45 C44 50.3(3) . . . . ? 
N15 C44 C45 C46 121.9(4) . . . . ? 
C43 C44 C45 C46 -54.8(5) . . . . ? 
N15 C44 C45 C39 -64.0(4) . . . . ? 
C43 C44 C45 C39 119.3(3) . . . . ? 
C39 C45 C46 S6 -178.1(2) . . . . ? 
C44 C45 C46 S6 -4.4(5) . . . . ? 
C39 C45 C46 S5 5.1(5) . . . . ? 
C44 C45 C46 S5 178.8(3) . . . . ? 
S8 C47 C48 S7 -0.5(5) . . . . ? 
S5 C47 C48 S7 179.7(2) . . . . ? 
S8 C47 C48 S6 179.39(19) . . . . ? 
S5 C47 C48 S6 -0.4(4) . . . . ? 
N16 C49 C50 N17 -0.2(5) . . . . ? 
S8 C49 C50 N17 -178.7(3) . . . . ? 
N16 C49 C50 S7 170.0(3) . . . . ? 
S8 C49 C50 S7 -8.5(5) . . . . ? 
N16 C51 C52 C53 -178.5(3) . . . . ? 
C56 C51 C52 C53 1.6(5) . . . . ? 
C51 C52 C53 C54 -0.8(5) . . . . ? 
C52 C53 C54 C55 0.3(6) . . . . ? 
C53 C54 C55 C56 -0.6(6) . . . . ? 
C54 C55 C56 N17 -178.4(3) . . . . ? 
C54 C55 C56 C51 1.4(5) . . . . ? 
N16 C51 C56 N17 -2.0(5) . . . . ? 
C52 C51 C56 N17 177.9(3) . . . . ? 
N16 C51 C56 C55 178.2(3) . . . . ? 
C52 C51 C56 C55 -1.9(5) . . . . ? 
N9 C12 Fe1 C10 -25(12) . . . . ? 
N9 C12 Fe1 C11 61(12) . . . . ? 
N9 C12 Fe1 N6 152(12) . . . . ? 
N9 C12 Fe1 N2 -118(12) . . . . ? 
N9 C12 Fe1 N4 -100(13) . . . . ? 
N7 C10 Fe1 C12 177(100) . . . . ? 
N7 C10 Fe1 C11 88(10) . . . . ? 
N7 C10 Fe1 N6 104(10) . . . . ? 
N7 C10 Fe1 N2 -92(10) . . . . ? 
N7 C10 Fe1 N4 -4(10) . . . . ? 
N8 C11 Fe1 C12 -15(23) . . . . ? 
N8 C11 Fe1 C10 72(23) . . . . ? 
N8 C11 Fe1 N6 -107(23) . . . . ? 
N8 C11 Fe1 N2 25(26) . . . . ? 
N8 C11 Fe1 N4 165(100) . . . . ? 
C2 C1 N1 N2 -1.3(3) . . . . ? 
C2 C1 N1 B1 178.3(3) . . . . ? 
N5 B1 N1 C1 -121.6(3) . . . . ? 
N3 B1 N1 C1 123.6(3) . . . . ? 
N5 B1 N1 N2 58.0(3) . . . . ? 
N3 B1 N1 N2 -56.9(3) . . . . ? 
C2 C3 N2 N1 -1.0(3) . . . . ? 
C2 C3 N2 Fe1 -177.32(19) . . . . ? 
C1 N1 N2 C3 1.5(3) . . . . ? 
B1 N1 N2 C3 -178.2(2) . . . . ? 
C1 N1 N2 Fe1 178.39(16) . . . . ? 
B1 N1 N2 Fe1 -1.3(3) . . . . ? 
C12 Fe1 N2 C3 41.0(2) . . . . ? 
C10 Fe1 N2 C3 -46.1(3) . . . . ? 
C11 Fe1 N2 C3 1(4) . . . . ? 
N6 Fe1 N2 C3 132.8(3) . . . . ? 
N4 Fe1 N2 C3 -138.6(3) . . . . ? 
C12 Fe1 N2 N1 -134.9(2) . . . . ? 
C10 Fe1 N2 N1 137.9(2) . . . . ? 
C11 Fe1 N2 N1 -175(56) . . . . ? 
N6 Fe1 N2 N1 -43.1(2) . . . . ? 
N4 Fe1 N2 N1 45.4(2) . . . . ? 
C5 C4 N3 N4 1.8(3) . . . . ? 
C5 C4 N3 B1 -177.1(3) . . . . ? 
N5 B1 N3 N4 -56.8(3) . . . . ? 
N1 B1 N3 N4 58.2(3) . . . . ? 
N5 B1 N3 C4 122.0(3) . . . . ? 
N1 B1 N3 C4 -123.0(3) . . . . ? 
C5 C6 N4 N3 1.1(3) . . . . ? 
C5 C6 N4 Fe1 179.2(2) . . . . ? 
C4 N3 N4 C6 -1.8(3) . . . . ? 
B1 N3 N4 C6 177.3(3) . . . . ? 
C4 N3 N4 Fe1 179.73(17) . . . . ? 
B1 N3 N4 Fe1 -1.2(4) . . . . ? 
C12 Fe1 N4 C6 120(5) . . . . ? 
C10 Fe1 N4 C6 44.4(3) . . . . ? 
C11 Fe1 N4 C6 -41.6(3) . . . . ? 
N6 Fe1 N4 C6 -132.1(3) . . . . ? 
N2 Fe1 N4 C6 137.6(3) . . . . ? 
C12 Fe1 N4 N3 -62(5) . . . . ? 
C10 Fe1 N4 N3 -137.5(3) . . . . ? 
C11 Fe1 N4 N3 136.5(3) . . . . ? 
N6 Fe1 N4 N3 46.0(3) . . . . ? 
N2 Fe1 N4 N3 -44.4(3) . . . . ? 
C8 C7 N5 N6 1.1(3) . . . . ? 
C8 C7 N5 B1 177.5(3) . . . . ? 
N3 B1 N5 C7 -119.4(3) . . . . ? 
N1 B1 N5 C7 126.6(3) . . . . ? 
N3 B1 N5 N6 56.6(3) . . . . ? 
N1 B1 N5 N6 -57.4(3) . . . . ? 
C8 C9 N6 N5 -0.5(3) . . . . ? 
C8 C9 N6 Fe1 -178.6(2) . . . . ? 
C7 N5 N6 C9 -0.4(3) . . . . ? 
B1 N5 N6 C9 -177.4(2) . . . . ? 
C7 N5 N6 Fe1 178.10(15) . . . . ? 
B1 N5 N6 Fe1 1.1(3) . . . . ? 
C12 Fe1 N6 C9 -48.3(3) . . . . ? 
C10 Fe1 N6 C9 24.1(15) . . . . ? 
C11 Fe1 N6 C9 39.8(3) . . . . ? 
N2 Fe1 N6 C9 -139.2(3) . . . . ? 
N4 Fe1 N6 C9 132.8(3) . . . . ? 
C12 Fe1 N6 N5 133.8(2) . . . . ? 
C10 Fe1 N6 N5 -153.9(14) . . . . ? 
C11 Fe1 N6 N5 -138.1(2) . . . . ? 
N2 Fe1 N6 N5 42.8(2) . . . . ? 
N4 Fe1 N6 N5 -45.2(2) . . . . ? 
Fe1 C10 N7 Ni1 -134(8) . . . 2_666 ? 
Fe1 C12 N9 Ni1 -108(11) . . . . ? 
C14 C13 N10 C17 -3.0(4) . . . . ? 
C14 C13 N10 Ni1 173.7(3) . . . . ? 
C16 C17 N10 C13 2.7(4) . . . . ? 
C23 C17 N10 C13 -179.9(3) . . . . ? 
C16 C17 N10 Ni1 -173.7(2) . . . . ? 
C23 C17 N10 Ni1 3.7(4) . . . . ? 
C19 C18 N11 C22 -1.1(4) . . . . ? 
C19 C18 N11 Ni1 177.2(2) . . . . ? 
C21 C22 N11 C18 -0.3(4) . . . . ? 
C23 C22 N11 C18 -174.1(3) . . . . ? 
C21 C22 N11 Ni1 -178.6(2) . . . . ? 
C23 C22 N11 Ni1 7.6(3) . . . . ? 
C30 C29 N12 C27 -176.7(3) . . . . ? 
C34 C29 N12 C27 1.0(4) . . . . ? 
C28 C27 N12 C29 -0.5(4) . . . . ? 
S3 C27 N12 C29 -175.5(2) . . . . ? 
C27 C28 N13 C34 1.7(4) . . . . ? 
S4 C28 N13 C34 177.31(18) . . . . ? 
C33 C34 N13 C28 176.0(3) . . . . ? 
C29 C34 N13 C28 -1.1(4) . . . . ? 
C36 C35 N14 C39 -0.4(4) . . . . ? 
C36 C35 N14 Ni1 174.7(2) . . . . ? 
C38 C39 N14 C35 2.1(4) . . . . ? 
C45 C39 N14 C35 -175.8(2) . . . . ? 
C38 C39 N14 Ni1 -172.9(2) . . . . ? 
C45 C39 N14 Ni1 9.2(3) . . . . ? 
C41 C40 N15 C44 2.6(4) . . . . ? 
C41 C40 N15 Ni1 172.4(2) . . . . ? 
C43 C44 N15 C40 -0.6(4) . . . . ? 
C45 C44 N15 C40 -177.3(2) . . . . ? 
C43 C44 N15 Ni1 -170.4(2) . . . . ? 
C45 C44 N15 Ni1 12.9(4) . . . . ? 
C56 C51 N16 C49 0.3(5) . . . . ? 
C52 C51 N16 C49 -179.5(3) . . . . ? 
C50 C49 N16 C51 0.8(5) . . . . ? 
S8 C49 N16 C51 179.4(3) . . . . ? 
C49 C50 N17 C56 -1.5(5) . . . . ? 
S7 C50 N17 C56 -172.3(3) . . . . ? 
C55 C56 N17 C50 -177.6(3) . . . . ? 
C51 C56 N17 C50 2.6(5) . . . . ? 
C12 N9 Ni1 N7 130(4) . . . 2_666 ? 
C12 N9 Ni1 N14 12(6) . . . . ? 
C12 N9 Ni1 N11 -55(4) . . . . ? 
C12 N9 Ni1 N15 41(4) . . . . ? 
C12 N9 Ni1 N10 -140(4) . . . . ? 
C35 N14 Ni1 N9 174(2) . . . . ? 
C39 N14 Ni1 N9 -11(2) . . . . ? 
C35 N14 Ni1 N7 56.0(2) . . . 2_666 ? 
C39 N14 Ni1 N7 -128.9(2) . . . 2_666 ? 
C35 N14 Ni1 N11 -119.8(2) . . . . ? 
C39 N14 Ni1 N11 55.3(2) . . . . ? 
C35 N14 Ni1 N15 144.14(19) . . . . ? 
C39 N14 Ni1 N15 -40.8(2) . . . . ? 
C35 N14 Ni1 N10 -34.4(2) . . . . ? 
C39 N14 Ni1 N10 140.66(19) . . . . ? 
C18 N11 Ni1 N9 54.5(2) . . . . ? 
C22 N11 Ni1 N9 -127.2(2) . . . . ? 
C18 N11 Ni1 N7 167.5(13) . . . 2_666 ? 
C22 N11 Ni1 N7 -14.1(16) . . . 2_666 ? 
C18 N11 Ni1 N14 -122.9(2) . . . . ? 
C22 N11 Ni1 N14 55.4(2) . . . . ? 
C18 N11 Ni1 N15 -35.6(2) . . . . ? 
C22 N11 Ni1 N15 142.7(2) . . . . ? 
C18 N11 Ni1 N10 143.1(2) . . . . ? 
C22 N11 Ni1 N10 -38.6(2) . . . . ? 
C40 N15 Ni1 N9 40.9(2) . . . . ? 
C44 N15 Ni1 N9 -149.6(2) . . . . ? 
C40 N15 Ni1 N7 -52.2(2) . . . 2_666 ? 
C44 N15 Ni1 N7 117.3(2) . . . 2_666 ? 
C40 N15 Ni1 N14 -140.5(2) . . . . ? 
C44 N15 Ni1 N14 29.0(2) . . . . ? 
C40 N15 Ni1 N11 129.56(19) . . . . ? 
C44 N15 Ni1 N11 -61.0(3) . . . . ? 
C40 N15 Ni1 N10 -10(3) . . . . ? 
C44 N15 Ni1 N10 160(3) . . . . ? 
C13 N10 Ni1 N9 -55.02(19) . . . . ? 
C17 N10 Ni1 N9 121.5(2) . . . . ? 
C13 N10 Ni1 N7 38.13(19) . . . 2_666 ? 
C17 N10 Ni1 N7 -145.4(2) . . . 2_666 ? 
C13 N10 Ni1 N14 126.33(18) . . . . ? 
C17 N10 Ni1 N14 -57.2(2) . . . . ? 
C13 N10 Ni1 N11 -143.72(19) . . . . ? 
C17 N10 Ni1 N11 32.8(2) . . . . ? 
C13 N10 Ni1 N15 -4(3) . . . . ? 
C17 N10 Ni1 N15 172(3) . . . . ? 
C23 C24 S1 C25 -159.7(3) . . . . ? 
S2 C24 S1 C25 20.35(19) . . . . ? 
C26 C25 S1 C24 -11.7(3) . . . . ? 
S3 C25 S1 C24 168.4(2) . . . . ? 
C25 C26 S2 C24 13.9(3) . . . . ? 
S4 C26 S2 C24 -168.57(19) . . . . ? 
C23 C24 S2 C26 159.2(3) . . . . ? 
S1 C24 S2 C26 -20.8(2) . . . . ? 
C26 C25 S3 C27 -40.4(3) . . . . ? 
S1 C25 S3 C27 139.53(19) . . . . ? 
C28 C27 S3 C25 40.3(3) . . . . ? 
N12 C27 S3 C25 -145.0(2) . . . . ? 
N13 C28 S4 C26 145.8(2) . . . . ? 
C27 C28 S4 C26 -38.5(3) . . . . ? 
C25 C26 S4 C28 39.3(3) . . . . ? 
S2 C26 S4 C28 -138.2(2) . . . . ? 
C48 C47 S5 C46 11.9(3) . . . . ? 
S8 C47 S5 C46 -168.0(2) . . . . ? 
C45 C46 S5 C47 158.4(3) . . . . ? 
S6 C46 S5 C47 -18.7(2) . . . . ? 
C47 C48 S6 C46 -11.4(3) . . . . ? 
S7 C48 S6 C46 168.5(2) . . . . ? 
C45 C46 S6 C48 -158.6(3) . . . . ? 
S5 C46 S6 C48 18.6(2) . . . . ? 
N17 C50 S7 C48 -148.3(3) . . . . ? 
C49 C50 S7 C48 41.1(3) . . . . ? 
C47 C48 S7 C50 -37.1(4) . . . . ? 
S6 C48 S7 C50 143.0(2) . . . . ? 
C50 C49 S8 C47 -29.6(3) . . . . ? 
N16 C49 S8 C47 151.8(3) . . . . ? 
C48 C47 S8 C49 34.7(3) . . . . ? 
S5 C47 S8 C49 -145.5(2) . . . . ? 
 
_diffrn_measured_fraction_theta_max    0.976 
_diffrn_reflns_theta_full              26.00 
_diffrn_measured_fraction_theta_full   0.976 
_refine_diff_density_max    0.398 
_refine_diff_density_min   -0.385 
_refine_diff_density_rms    0.063 

#===END
 
data_2
 
_audit_creation_method            SHELXL-97 
_chemical_name_systematic 
; 
 ? 
; 
_chemical_name_common             ? 
_chemical_melting_point           ? 
_chemical_formula_moiety          ? 
_chemical_formula_sum 
 'C104 H104 B2 Cl2 Fe2 N26 Ni2 O30 S8' 
_chemical_formula_weight          2776.25 
 
loop_ 
 _atom_type_symbol 
 _atom_type_description 
 _atom_type_scat_dispersion_real 
 _atom_type_scat_dispersion_imag 
 _atom_type_scat_source 
 'C'  'C'   0.0033   0.0016 
 'International Tables Vol C Tables 4.2.6.8 and 6.1.1.4' 
 'H'  'H'   0.0000   0.0000 
 'International Tables Vol C Tables 4.2.6.8 and 6.1.1.4' 
 'B'  'B'   0.0013   0.0007 
 'International Tables Vol C Tables 4.2.6.8 and 6.1.1.4' 
 'N'  'N'   0.0061   0.0033 
 'International Tables Vol C Tables 4.2.6.8 and 6.1.1.4' 
 'O'  'O'   0.0106   0.0060 
 'International Tables Vol C Tables 4.2.6.8 and 6.1.1.4' 
 'S'  'S'   0.1246   0.1234 
 'International Tables Vol C Tables 4.2.6.8 and 6.1.1.4' 
 'Fe'  'Fe'   0.3463   0.8444 
 'International Tables Vol C Tables 4.2.6.8 and 6.1.1.4' 
 'Ni'  'Ni'   0.3393   1.1124 
 'International Tables Vol C Tables 4.2.6.8 and 6.1.1.4' 
 'Cl'  'Cl'   0.1484   0.1585 
 'International Tables Vol C Tables 4.2.6.8 and 6.1.1.4' 
 
_symmetry_cell_setting            triclinic 
_symmetry_space_group_name_H-M    P-1 
 
loop_ 
 _symmetry_equiv_pos_as_xyz 
 'x, y, z' 
 '-x, -y, -z' 
 
_cell_length_a                    14.0971(14) 
_cell_length_b                    16.2489(17) 
_cell_length_c                    17.8026(18) 
_cell_angle_alpha                 66.554(2) 
_cell_angle_beta                  80.021(3) 
_cell_angle_gamma                 86.640(2) 
_cell_volume                      3684.4(6) 
_cell_formula_units_Z             1 
_cell_measurement_temperature     291(2) 
_cell_measurement_reflns_used     2122
_cell_measurement_theta_min       1.8 
_cell_measurement_theta_max       23.8
 
_exptl_crystal_description        'plate'
_exptl_crystal_colour             'Red' 
_exptl_crystal_size_max           0.16 
_exptl_crystal_size_mid           0.15 
_exptl_crystal_size_min           0.15 
_exptl_crystal_density_meas       ? 
_exptl_crystal_density_diffrn     1.251 
_exptl_crystal_density_method     'not measured' 
_exptl_crystal_F_000              1430 
_exptl_absorpt_coefficient_mu     0.665 
_exptl_absorpt_correction_type    'multi-scan' 
_exptl_absorpt_correction_T_min   0.8991 
_exptl_absorpt_correction_T_max   0.9052 
_exptl_absorpt_process_details    'SADABS; Bruker, 2000'
 
_exptl_special_details 
; 
 ? 
; 
 
_diffrn_ambient_temperature       291(2) 
_diffrn_radiation_wavelength      0.71073 
_diffrn_radiation_type            MoK\a 
_diffrn_radiation_source          'fine-focus sealed tube' 
_diffrn_radiation_monochromator   graphite 
_diffrn_measurement_device_type   ? 
_diffrn_measurement_method        ? 
_diffrn_detector_area_resol_mean  ? 
_diffrn_standards_number          ? 
_diffrn_standards_interval_count  ? 
_diffrn_standards_interval_time   ? 
_diffrn_standards_decay_%         ? 
_diffrn_reflns_number             19969 
_diffrn_reflns_av_R_equivalents   0.0254 
_diffrn_reflns_av_sigmaI/netI     0.0741 
_diffrn_reflns_limit_h_min        -17 
_diffrn_reflns_limit_h_max        16 
_diffrn_reflns_limit_k_min        -20 
_diffrn_reflns_limit_k_max        13 
_diffrn_reflns_limit_l_min        -21 
_diffrn_reflns_limit_l_max        20 
_diffrn_reflns_theta_min          1.99 
_diffrn_reflns_theta_max          26.00 
_reflns_number_total              14111 
_reflns_number_gt                 9971 
_reflns_threshold_expression      >2sigma(I) 
 
_computing_data_collection      'SMART (Bruker, 2000)'
_computing_cell_refinement      'SMART'
_computing_data_reduction       'SAINT (Bruker, 2000)'
_computing_structure_solution   'SHELXTL (Bruker, 2000)'
_computing_structure_refinement 'SHELXTL'
_computing_molecular_graphics   'SHELXTL'
_computing_publication_material 'SHELXTL' 
 
_refine_special_details 
; 
 Refinement of F^2^ against ALL reflections.  The weighted R-factor wR and 
 goodness of fit S are based on F^2^, conventional R-factors R are based 
 on F, with F set to zero for negative F^2^. The threshold expression of 
 F^2^ > 2sigma(F^2^) is used only for calculating R-factors(gt) etc. and is 
 not relevant to the choice of reflections for refinement.  R-factors based 
 on F^2^ are statistically about twice as large as those based on F, and R- 
 factors based on ALL data will be even larger. 
; 
 
_refine_ls_structure_factor_coef  Fsqd  
_refine_ls_matrix_type            fullcycle 
_refine_ls_weighting_scheme       calc  
_refine_ls_weighting_details 
 'calc w=1/[\s^2^(Fo^2^)+(0.0400P)^2^+1.2200P] where P=(Fo^2^+2Fc^2^)/3' 
_atom_sites_solution_primary      direct 
_atom_sites_solution_secondary    difmap 
_atom_sites_solution_hydrogens    geom 
_refine_ls_hydrogen_treatment     constr 
_refine_ls_extinction_method      none 
_refine_ls_extinction_coef        ? 
_refine_ls_number_reflns          14111 
_refine_ls_number_parameters      860 
_refine_ls_number_restraints      0 
_refine_ls_R_factor_all           0.0809 
_refine_ls_R_factor_gt            0.0510 
_refine_ls_wR_factor_ref          0.0997 
_refine_ls_wR_factor_gt           0.0935 
_refine_ls_goodness_of_fit_ref    1.007 
_refine_ls_restrained_S_all       1.007 
_refine_ls_shift/su_max           0.000 
_refine_ls_shift/su_mean          0.000 
 
loop_ 
 _atom_site_label 
 _atom_site_type_symbol 
 _atom_site_fract_x 
 _atom_site_fract_y 
 _atom_site_fract_z 
 _atom_site_U_iso_or_equiv 
 _atom_site_adp_type 
 _atom_site_occupancy 
 _atom_site_symmetry_multiplicity 
 _atom_site_calc_flag 
 _atom_site_refinement_flags 
 _atom_site_disorder_assembly 
 _atom_site_disorder_group 
B1 B 0.9323(2) 0.8487(2) 0.3962(2) 0.0369(7) Uani 1 1 d . . . 
C1 C 1.1567(2) 0.8675(2) 0.3517(2) 0.0510(8) Uani 1 1 d . . . 
H1A H 1.1603 0.8369 0.4097 0.076 Uiso 1 1 calc R . . 
H1B H 1.1218 0.9222 0.3427 0.076 Uiso 1 1 calc R . . 
H1C H 1.2206 0.8810 0.3204 0.076 Uiso 1 1 calc R . . 
C2 C 1.1052(2) 0.8079(2) 0.3236(2) 0.047 Uani 1 1 d . . . 
H2 H 1.0949 0.8412 0.2662 0.056 Uiso 1 1 d R . . 
C3 C 1.1724(2) 0.7313(2) 0.3297(2) 0.0502(8) Uani 1 1 d . . . 
H3A H 1.2365 0.7542 0.3046 0.075 Uiso 1 1 calc R . . 
H3B H 1.1520 0.6978 0.3013 0.075 Uiso 1 1 calc R . . 
H3C H 1.1717 0.6929 0.3870 0.075 Uiso 1 1 calc R . . 
C4 C 1.0057(2) 0.78079(19) 0.38134(19) 0.0399(7) Uani 1 1 d . . . 
H4A H 0.9726 0.7453 0.3608 0.048 Uiso 1 1 calc R . . 
H4B H 1.0191 0.7404 0.4355 0.048 Uiso 1 1 calc R . . 
C5 C 0.7927(2) 0.7244(2) 0.43073(18) 0.0390(7) Uani 1 1 d . . . 
H5 H 0.8321 0.6808 0.4205 0.047 Uiso 1 1 calc R . . 
C6 C 0.6917(2) 0.7169(2) 0.45697(19) 0.0458(7) Uani 1 1 d . . . 
H6 H 0.6521 0.6681 0.4688 0.055 Uiso 1 1 calc R . . 
C7 C 0.6644(2) 0.8005(2) 0.46129(18) 0.0375(6) Uani 1 1 d . . . 
H7 H 0.6020 0.8174 0.4756 0.045 Uiso 1 1 calc R . . 
C8 C 0.9983(2) 0.8435(2) 0.52895(17) 0.0412(7) Uani 1 1 d . . . 
H8 H 1.0487 0.8039 0.5291 0.049 Uiso 1 1 calc R . . 
C9 C 0.9706(2) 0.88514(19) 0.58462(18) 0.0391(7) Uani 1 1 d . . . 
H9 H 1.0003 0.8790 0.6293 0.047 Uiso 1 1 calc R . . 
C10 C 0.89146(19) 0.93681(19) 0.56126(17) 0.0338(6) Uani 1 1 d . . . 
H10 H 0.8595 0.9722 0.5876 0.041 Uiso 1 1 calc R . . 
C11 C 0.9549(2) 0.9790(2) 0.24575(18) 0.044 Uani 1 1 d . . . 
H11 H 1.0041 0.9514 0.2225 0.053 Uiso 1 1 d R . . 
C12 C 0.9195(2) 1.0622(2) 0.2014(2) 0.0479(8) Uani 1 1 d . . . 
H12 H 0.9362 1.1005 0.1460 0.057 Uiso 1 1 calc R . . 
C13 C 0.8544(2) 1.0713(2) 0.26127(18) 0.0411(7) Uani 1 1 d . . . 
H13 H 0.8151 1.1211 0.2535 0.049 Uiso 1 1 calc R . . 
C14 C 0.64820(19) 1.0125(2) 0.38258(16) 0.0366(7) Uani 1 1 d . . . 
C15 C 0.7655(2) 1.09008(18) 0.43661(19) 0.0390(7) Uani 1 1 d . . . 
C16 C 0.67269(19) 0.9443(2) 0.53989(18) 0.0348(6) Uani 1 1 d . . . 
C17 C 0.56350(19) 1.10668(19) 0.63026(17) 0.0339(6) Uani 1 1 d . . . 
H17 H 0.5712 1.0955 0.5823 0.041 Uiso 1 1 calc R . . 
C18 C 0.5601(2) 1.1935(2) 0.62350(18) 0.0374(6) Uani 1 1 d . . . 
H18 H 0.5635 1.2407 0.5718 0.045 Uiso 1 1 calc R . . 
C19 C 0.55162(19) 1.20967(19) 0.69315(18) 0.0356(6) Uani 1 1 d . . . 
H19 H 0.5501 1.2686 0.6891 0.043 Uiso 1 1 calc R . . 
C20 C 0.5455(2) 1.1420(2) 0.76805(19) 0.0420(7) Uani 1 1 d . . . 
H20 H 0.5387 1.1542 0.8155 0.050 Uiso 1 1 calc R . . 
C21 C 0.5491(2) 1.05343(19) 0.77500(17) 0.0363(6) Uani 1 1 d . . . 
C22 C 0.35785(19) 0.83671(18) 0.84527(17) 0.0329(6) Uani 1 1 d . . . 
H22 H 0.3411 0.8213 0.8042 0.040 Uiso 1 1 calc R . . 
C23 C 0.2987(2) 0.8075(2) 0.92164(18) 0.0387(7) Uani 1 1 d . . . 
H23 H 0.2428 0.7740 0.9330 0.046 Uiso 1 1 calc R . . 
C24 C 0.3303(2) 0.8328(2) 0.98258(18) 0.0382(7) Uani 1 1 d . . . 
H24 H 0.2964 0.8122 1.0365 0.046 Uiso 1 1 calc R . . 
C25 C 0.4085(2) 0.88598(19) 0.96180(17) 0.0371(6) Uani 1 1 d . . . 
H25 H 0.4269 0.9047 1.0002 0.045 Uiso 1 1 calc R . . 
C26 C 0.46097(19) 0.91242(17) 0.88269(17) 0.0305(6) Uani 1 1 d . . . 
C27 C 0.54441(19) 0.97462(17) 0.85730(16) 0.0310(6) Uani 1 1 d . . . 
C28 C 0.61041(19) 0.97177(18) 0.90608(16) 0.0300(6) Uani 1 1 d . . . 
C29 C 0.7160(2) 0.9258(2) 1.02204(19) 0.0405(7) Uani 1 1 d . . . 
C30 C 0.76295(19) 0.99629(19) 0.95921(17) 0.0345(6) Uani 1 1 d . . . 
C31 C 0.7416(2) 0.8787(2) 1.10502(19) 0.0428(7) Uani 1 1 d . . . 
C32 C 0.7192(2) 0.8767(2) 1.24012(19) 0.0492(8) Uani 1 1 d . . . 
H32A H 0.7454 0.8177 1.2527 0.074 Uiso 1 1 calc R . . 
H32B H 0.6605 0.8733 1.2778 0.074 Uiso 1 1 calc R . . 
H32C H 0.7647 0.9147 1.2457 0.074 Uiso 1 1 calc R . . 
C33 C 0.8473(2) 1.0390(2) 0.96960(17) 0.0391(7) Uani 1 1 d . . . 
C34 C 0.9593(2) 1.1640(2) 0.8972(2) 0.0492(8) Uani 1 1 d . . . 
H34A H 0.9521 1.1730 0.9480 0.074 Uiso 1 1 calc R . . 
H34B H 0.9600 1.2210 0.8514 0.074 Uiso 1 1 calc R . . 
H34C H 1.0188 1.1337 0.8904 0.074 Uiso 1 1 calc R . . 
C35 C 0.4681(2) 0.7730(2) 0.65166(17) 0.0382(7) Uani 1 1 d . . . 
H35 H 0.4530 0.8256 0.6093 0.046 Uiso 1 1 calc R . . 
C36 C 0.4541(2) 0.6941(2) 0.64524(19) 0.0435(7) Uani 1 1 d . . . 
H36 H 0.4312 0.6940 0.5993 0.052 Uiso 1 1 calc R . . 
C37 C 0.4744(3) 0.6124(2) 0.7085(2) 0.0506(8) Uani 1 1 d . . . 
H37 H 0.4641 0.5577 0.7058 0.061 Uiso 1 1 calc R . . 
C38 C 0.5108(2) 0.6164(2) 0.7754(2) 0.0458(8) Uani 1 1 d . . . 
H38 H 0.5276 0.5643 0.8174 0.055 Uiso 1 1 calc R . . 
C39 C 0.5214(2) 0.7008(2) 0.77791(19) 0.0417(7) Uani 1 1 d . . . 
C40 C 0.7246(2) 0.8945(2) 0.75728(17) 0.0356(6) Uani 1 1 d . . . 
H40 H 0.7263 0.9518 0.7156 0.043 Uiso 1 1 calc R . . 
C41 C 0.8067(2) 0.8655(2) 0.79650(18) 0.0412(7) Uani 1 1 d . . . 
H41 H 0.8624 0.8999 0.7831 0.049 Uiso 1 1 calc R . . 
C42 C 0.7936(2) 0.7791(2) 0.8577(2) 0.0517(9) Uani 1 1 d . . . 
H42 H 0.8423 0.7573 0.8895 0.062 Uiso 1 1 calc R . . 
C43 C 0.7194(2) 0.7245(2) 0.87550(19) 0.0418(7) Uani 1 1 d . . . 
H43 H 0.7188 0.6646 0.9119 0.050 Uiso 1 1 calc R . . 
C44 C 0.6414(2) 0.7651(2) 0.83444(19) 0.0431(7) Uani 1 1 d . . . 
C45 C 0.5573(2) 0.7067(2) 0.85036(19) 0.0443(7) Uani 1 1 d . . . 
C46 C 0.5078(2) 0.6632(2) 0.92832(19) 0.0396(7) Uani 1 1 d . . . 
C47 C 0.3660(2) 0.5932(2) 1.0504(2) 0.0466(8) Uani 1 1 d . . . 
C48 C 0.4274(2) 0.62788(19) 1.08061(18) 0.0379(7) Uani 1 1 d . . . 
C49 C 0.2665(3) 0.5636(2) 1.0896(2) 0.0492(8) Uani 1 1 d . . . 
C50 C 0.1229(3) 0.4797(2) 1.0986(2) 0.0599(10) Uani 1 1 d . . . 
H50A H 0.1002 0.4378 1.1541 0.090 Uiso 1 1 calc R . . 
H50B H 0.1085 0.4570 1.0596 0.090 Uiso 1 1 calc R . . 
H50C H 0.0917 0.5362 1.0894 0.090 Uiso 1 1 calc R . . 
C51 C 0.4074(3) 0.6333(2) 1.1624(2) 0.0456(8) Uani 1 1 d . . . 
C52 C 0.3270(3) 0.5603(2) 1.3031(2) 0.0508(8) Uani 1 1 d . . . 
H52A H 0.3373 0.6172 1.3052 0.076 Uiso 1 1 calc R . . 
H52B H 0.3549 0.5137 1.3460 0.076 Uiso 1 1 calc R . . 
H52C H 0.2591 0.5491 1.3111 0.076 Uiso 1 1 calc R . . 
Cl1 Cl 0.5000 0.5000 0.5000 0.0540(3) Uani 1 2 d S . . 
Cl2 Cl 0.8863(6) 0.5004(5) 0.3497(5) 0.250(3) Uiso 0.50 1 d P . . 
Fe1 Fe 0.75929(3) 0.97206(3) 0.43840(2) 0.03107(9) Uani 1 1 d . . . 
N1 N 0.82263(16) 0.80603(15) 0.42291(14) 0.0342(5) Uani 1 1 d . . . 
N2 N 0.74830(16) 0.85360(16) 0.44009(14) 0.0341(5) Uani 1 1 d . . . 
N3 N 0.93515(17) 0.87394(15) 0.47485(14) 0.0343(5) Uani 1 1 d . . . 
N4 N 0.86796(16) 0.92891(16) 0.49673(14) 0.0343(5) Uani 1 1 d . . . 
N5 N 0.91579(16) 0.94048(15) 0.32430(14) 0.0317(5) Uani 1 1 d . . . 
N6 N 0.85184(16) 1.00104(15) 0.33401(14) 0.0338(5) Uani 1 1 d . . . 
N7 N 0.58703(15) 1.04107(15) 0.34826(14) 0.0324(5) Uani 1 1 d . . . 
N8 N 0.76683(19) 1.16217(17) 0.43376(17) 0.0453(6) Uani 1 1 d . . . 
N9 N 0.62001(17) 0.93010(17) 0.60139(15) 0.0389(6) Uani 1 1 d . . . 
N10 N 0.55590(16) 1.03496(16) 0.70631(15) 0.0344(5) Uani 1 1 d . . . 
N11 N 0.43861(16) 0.88643(15) 0.82700(14) 0.0325(5) Uani 1 1 d . . . 
N12 N 0.50227(18) 0.78056(17) 0.71519(15) 0.0400(6) Uani 1 1 d . . . 
N13 N 0.64727(16) 0.84674(16) 0.77537(14) 0.0341(5) Uani 1 1 d . . . 
Ni1 Ni 0.52967(2) 0.90573(2) 0.71258(2) 0.02797(8) Uani 1 1 d . . . 
O1 O 0.80050(17) 0.81992(15) 1.12275(14) 0.0532(6) Uani 1 1 d . . . 
O2 O 0.69936(16) 0.91384(14) 1.15497(12) 0.0457(5) Uani 1 1 d . . . 
O3 O 0.88107(15) 1.01648(14) 1.02800(12) 0.0444(5) Uani 1 1 d . . . 
O4 O 0.87575(14) 1.10738(14) 0.90013(12) 0.0407(5) Uani 1 1 d . . . 
O5 O 0.24174(18) 0.49379(16) 1.08616(15) 0.0588(6) Uani 1 1 d . . . 
O6 O 0.21558(17) 0.60874(17) 1.12626(16) 0.0587(6) Uani 1 1 d . . . 
O7 O 0.37318(15) 0.56167(14) 1.22056(13) 0.0440(5) Uani 1 1 d . . . 
O8 O 0.42711(17) 0.69744(15) 1.17133(13) 0.0503(6) Uani 1 1 d . . . 
O11 O 0.5974(4) 0.4780(3) 0.5000(3) 0.0627(13) Uani 0.50 1 d P . . 
O12 O 0.4500(4) 0.4666(4) 0.4530(3) 0.0642(14) Uani 0.50 1 d P . . 
O13 O 0.4618(4) 0.4556(4) 0.5844(3) 0.0715(16) Uani 0.50 1 d P . . 
O14 O 0.4917(4) 0.5932(3) 0.4683(3) 0.0655(14) Uani 0.50 1 d P . . 
O21 O 0.9654(4) 0.4542(3) 0.3270(3) 0.0574(12) Uani 0.50 1 d P . . 
O22 O 0.8072(4) 0.5114(3) 0.3051(3) 0.0568(12) Uani 0.50 1 d P . . 
O23 O 0.8542(4) 0.4425(3) 0.4333(3) 0.0711(16) Uani 0.50 1 d P . . 
O24 O 0.9179(4) 0.5882(4) 0.3332(3) 0.0584(12) Uani 0.50 1 d P . . 
O1W O 0.0280(4) 0.6903(3) 0.9597(3) 0.0529(13) Uani 0.45 1 d P . . 
H1X H 0.0245 0.7179 0.9919 0.064 Uiso 0.45 1 d PR . . 
H1Y H -0.0147 0.7098 0.9287 0.064 Uiso 0.45 1 d PR . . 
O2W O 0.1824(3) 0.7079(3) 0.8347(3) 0.0463(12) Uani 0.45 1 d P . . 
H2X H 0.1638 0.6974 0.7964 0.056 Uiso 0.45 1 d PR . . 
H2Y H 0.2257 0.6708 0.8544 0.056 Uiso 0.45 1 d PR . . 
O3W O 0.3601(5) 0.3861(4) 0.7670(4) 0.084(2) Uani 0.45 1 d P . . 
H3X H 0.3353 0.4308 0.7764 0.100 Uiso 0.45 1 d PR . . 
H3Y H 0.3803 0.3490 0.8102 0.100 Uiso 0.45 1 d PR . . 
O4W O 0.9543(5) 0.4526(3) 0.5185(3) 0.0676(16) Uani 0.45 1 d P . . 
H4X H 0.8960 0.4462 0.5428 0.081 Uiso 0.45 1 d PR . . 
H4Y H 0.9896 0.4630 0.5480 0.081 Uiso 0.45 1 d PR . . 
O5W O 0.1625(5) 0.3473(4) 0.3577(4) 0.069(2) Uani 0.40 1 d P . . 
H5X H 0.2220 0.3461 0.3611 0.083 Uiso 0.40 1 d PR . . 
H5Y H 0.1403 0.3989 0.3517 0.083 Uiso 0.40 1 d PR . . 
O6W O 0.9418(5) 0.6745(5) 0.7094(4) 0.073(2) Uani 0.40 1 d P . . 
H6X H 0.9272 0.6921 0.6611 0.088 Uiso 0.40 1 d PR . . 
H6Y H 0.9320 0.7188 0.7235 0.088 Uiso 0.40 1 d PR . . 
O7W O 0.1597(4) 0.4264(4) 0.8859(4) 0.0553(15) Uani 0.40 1 d P . . 
H7X H 0.1174 0.4392 0.8543 0.066 Uiso 0.40 1 d PR . . 
H7Y H 0.1657 0.3697 0.9081 0.066 Uiso 0.40 1 d PR . . 
S1 S 0.61293(5) 0.88643(5) 1.00399(4) 0.03736(16) Uani 1 1 d . . . 
S2 S 0.70969(5) 1.04563(5) 0.87004(4) 0.03642(16) Uani 1 1 d . . . 
S3 S 0.40521(6) 0.59509(5) 0.95057(5) 0.04469(19) Uani 1 1 d . . . 
S4 S 0.53953(6) 0.66834(5) 1.01660(5) 0.04128(18) Uani 1 1 d . . . 
 
loop_ 
 _atom_site_aniso_label 
 _atom_site_aniso_U_11 
 _atom_site_aniso_U_22 
 _atom_site_aniso_U_33 
 _atom_site_aniso_U_23 
 _atom_site_aniso_U_13 
 _atom_site_aniso_U_12 
B1 0.0337(18) 0.0384(18) 0.0409(18) -0.0170(15) -0.0108(14) 0.0063(14) 
C1 0.0441(19) 0.054(2) 0.0437(18) -0.0141(16) 0.0113(14) -0.0051(15) 
C2 0.041 0.045 0.053 -0.015 -0.019 0.012 
C3 0.0388(18) 0.0513(19) 0.057(2) -0.0185(16) -0.0102(15) 0.0149(15) 
C4 0.0397(17) 0.0309(15) 0.0524(18) -0.0210(14) -0.0080(14) 0.0098(12) 
C5 0.0435(17) 0.0417(16) 0.0371(16) -0.0216(13) -0.0067(13) 0.0038(13) 
C6 0.0485(19) 0.0474(18) 0.0479(18) -0.0237(15) -0.0082(15) -0.0120(14) 
C7 0.0356(16) 0.0444(16) 0.0376(15) -0.0212(13) -0.0051(12) -0.0048(12) 
C8 0.0348(16) 0.0501(18) 0.0327(15) -0.0088(13) -0.0089(12) 0.0010(13) 
C9 0.0411(17) 0.0375(16) 0.0397(16) -0.0130(13) -0.0154(13) 0.0042(13) 
C10 0.0250(14) 0.0450(16) 0.0381(15) -0.0228(13) -0.0044(11) -0.0073(11) 
C11 0.039 0.058 0.035 -0.017 -0.006 0.000 
C12 0.0439(18) 0.0515(19) 0.0374(17) -0.0095(15) 0.0043(14) -0.0073(15) 
C13 0.0293(15) 0.0448(17) 0.0389(16) -0.0043(13) -0.0074(12) -0.0054(12) 
C14 0.0277(14) 0.0587(18) 0.0280(14) -0.0213(13) -0.0112(11) 0.0151(13) 
C15 0.0462(17) 0.0286(14) 0.0475(17) -0.0138(13) -0.0288(14) 0.0135(12) 
C16 0.0213(13) 0.0511(17) 0.0432(16) -0.0280(14) -0.0125(11) 0.0059(12) 
C17 0.0268(14) 0.0452(16) 0.0305(14) -0.0137(12) -0.0092(11) -0.0011(12) 
C18 0.0345(15) 0.0410(16) 0.0418(17) -0.0169(13) -0.0148(13) -0.0084(12) 
C19 0.0289(15) 0.0367(15) 0.0415(16) -0.0158(13) -0.0070(12) 0.0051(12) 
C20 0.0399(17) 0.0435(17) 0.0429(17) -0.0169(14) -0.0114(13) 0.0096(13) 
C21 0.0378(16) 0.0386(16) 0.0281(14) -0.0097(12) -0.0034(12) 0.0027(12) 
C22 0.0285(14) 0.0372(15) 0.0340(14) -0.0113(12) -0.0158(11) 0.0064(11) 
C23 0.0304(15) 0.0438(17) 0.0400(16) -0.0153(13) -0.0055(12) 0.0055(12) 
C24 0.0290(15) 0.0447(17) 0.0356(15) -0.0149(13) 0.0023(12) 0.0119(12) 
C25 0.0340(16) 0.0431(16) 0.0344(15) -0.0153(13) -0.0070(12) 0.0042(12) 
C26 0.0293(14) 0.0276(13) 0.0370(15) -0.0137(11) -0.0126(11) 0.0097(10) 
C27 0.0274(14) 0.0282(13) 0.0345(14) -0.0114(11) -0.0009(11) 0.0025(11) 
C28 0.0281(14) 0.0357(14) 0.0297(14) -0.0170(12) -0.0020(11) -0.0052(11) 
C29 0.0408(17) 0.0449(17) 0.0412(17) -0.0187(14) -0.0168(13) 0.0028(13) 
C30 0.0264(14) 0.0443(16) 0.0359(15) -0.0176(13) -0.0082(11) -0.0008(12) 
C31 0.0529(19) 0.0364(16) 0.0414(17) -0.0170(14) -0.0142(14) 0.0142(14) 
C32 0.053(2) 0.057(2) 0.0402(17) -0.0198(15) -0.0197(15) 0.0190(16) 
C33 0.0389(16) 0.0486(17) 0.0324(15) -0.0153(13) -0.0136(12) -0.0007(13) 
C34 0.0384(18) 0.062(2) 0.053(2) -0.0248(17) -0.0118(15) -0.0131(15) 
C35 0.0416(16) 0.0453(17) 0.0341(15) -0.0219(13) -0.0115(13) 0.0137(13) 
C36 0.0488(19) 0.0421(17) 0.0418(17) -0.0136(14) -0.0152(14) -0.0135(14) 
C37 0.072(2) 0.0352(16) 0.053(2) -0.0183(15) -0.0305(17) 0.0033(15) 
C38 0.057(2) 0.0386(17) 0.0486(18) -0.0183(14) -0.0287(16) 0.0178(14) 
C39 0.0420(17) 0.0404(16) 0.0476(17) -0.0199(14) -0.0190(14) 0.0169(13) 
C40 0.0325(15) 0.0420(16) 0.0334(15) -0.0147(13) -0.0124(12) 0.0125(12) 
C41 0.0398(17) 0.0506(18) 0.0397(16) -0.0199(14) -0.0205(13) 0.0072(14) 
C42 0.048(2) 0.0468(19) 0.070(2) -0.0233(17) -0.0353(17) 0.0056(15) 
C43 0.0409(17) 0.0415(17) 0.0484(18) -0.0175(14) -0.0259(14) 0.0139(13) 
C44 0.0369(17) 0.0507(19) 0.0443(17) -0.0166(15) -0.0229(14) 0.0141(14) 
C45 0.0483(19) 0.0469(18) 0.0382(17) -0.0140(14) -0.0187(14) 0.0112(14) 
C46 0.0297(15) 0.0529(18) 0.0448(17) -0.0279(15) -0.0086(13) 0.0069(13) 
C47 0.0444(19) 0.0446(18) 0.0485(19) -0.0150(15) -0.0092(15) -0.0016(14) 
C48 0.0458(17) 0.0321(15) 0.0386(16) -0.0142(13) -0.0194(13) 0.0185(13) 
C49 0.056(2) 0.0373(18) 0.0480(19) -0.0082(15) -0.0112(16) -0.0080(15) 
C50 0.052(2) 0.047(2) 0.062(2) -0.0122(17) 0.0208(17) -0.0198(16) 
C51 0.064(2) 0.0264(15) 0.0508(19) -0.0163(14) -0.0198(16) 0.0082(14) 
C52 0.063(2) 0.0463(19) 0.0458(19) -0.0203(15) -0.0118(16) 0.0024(16) 
Cl1 0.0493(7) 0.0508(7) 0.0590(7) -0.0162(6) -0.0175(6) 0.0084(5) 
Fe1 0.0296(2) 0.0327(2) 0.0331(2) -0.01413(17) -0.01037(16) 0.00703(16) 
N1 0.0258(12) 0.0384(13) 0.0410(13) -0.0178(11) -0.0071(10) 0.0015(10) 
N2 0.0310(13) 0.0391(13) 0.0354(13) -0.0170(11) -0.0084(10) 0.0014(10) 
N3 0.0321(13) 0.0347(12) 0.0371(13) -0.0127(10) -0.0149(10) 0.0104(10) 
N4 0.0248(12) 0.0406(13) 0.0400(13) -0.0192(11) -0.0061(10) 0.0082(10) 
N5 0.0324(13) 0.0309(12) 0.0332(12) -0.0139(10) -0.0073(10) 0.0046(9) 
N6 0.0333(13) 0.0348(13) 0.0338(12) -0.0123(10) -0.0112(10) 0.0052(10) 
N7 0.0232(11) 0.0422(13) 0.0371(13) -0.0200(11) -0.0121(9) 0.0121(10) 
N8 0.0454(15) 0.0373(14) 0.0555(16) -0.0190(13) -0.0176(13) 0.0151(12) 
N9 0.0309(13) 0.0450(14) 0.0395(14) -0.0143(11) -0.0113(10) 0.0084(11) 
N10 0.0266(12) 0.0382(13) 0.0406(13) -0.0155(11) -0.0117(10) 0.0026(10) 
N11 0.0327(12) 0.0353(12) 0.0320(12) -0.0138(10) -0.0128(10) 0.0065(10) 
N12 0.0415(14) 0.0439(14) 0.0391(14) -0.0193(12) -0.0122(11) 0.0057(11) 
N13 0.0343(13) 0.0405(13) 0.0396(13) -0.0258(11) -0.0189(10) 0.0206(10) 
Ni1 0.01986(16) 0.03425(18) 0.03265(18) -0.01404(15) -0.01281(13) 0.01018(13) 
O1 0.0512(14) 0.0513(13) 0.0543(14) -0.0188(11) -0.0133(11) 0.0210(11) 
O2 0.0616(14) 0.0472(12) 0.0255(10) -0.0117(9) -0.0093(10) 0.0086(11) 
O3 0.0434(12) 0.0517(13) 0.0378(11) -0.0107(10) -0.0186(9) -0.0115(10) 
O4 0.0370(11) 0.0515(12) 0.0372(11) -0.0171(10) -0.0135(9) -0.0087(9) 
O5 0.0593(15) 0.0522(14) 0.0593(15) -0.0257(12) 0.0185(12) -0.0152(12) 
O6 0.0503(14) 0.0576(15) 0.0660(16) -0.0216(13) -0.0159(12) 0.0151(12) 
O7 0.0446(12) 0.0454(12) 0.0397(12) -0.0172(10) -0.0009(9) 0.0041(10) 
O8 0.0608(15) 0.0489(13) 0.0449(13) -0.0191(11) -0.0108(11) -0.0171(11) 
O11 0.073(4) 0.049(3) 0.064(3) -0.019(2) -0.018(3) 0.017(3) 
O12 0.068(3) 0.074(4) 0.054(3) -0.027(3) -0.019(3) 0.017(3) 
O13 0.050(3) 0.064(3) 0.072(4) -0.003(3) 0.001(3) 0.009(3) 
O14 0.072(4) 0.049(3) 0.066(3) -0.015(3) -0.011(3) 0.020(3) 
O21 0.057(3) 0.060(3) 0.052(3) -0.018(2) -0.015(2) 0.007(2) 
O22 0.052(3) 0.068(3) 0.055(3) -0.025(3) -0.013(2) -0.013(2) 
O23 0.093(4) 0.058(3) 0.045(3) -0.016(2) 0.032(3) -0.024(3) 
O24 0.051(3) 0.067(3) 0.062(3) -0.032(3) -0.006(2) 0.011(2) 
O1W 0.048(3) 0.052(3) 0.057(3) -0.018(3) -0.020(2) 0.026(2) 
O2W 0.022(2) 0.061(3) 0.058(3) -0.020(3) -0.017(2) -0.002(2) 
O3W 0.077(4) 0.072(4) 0.067(4) -0.009(3) 0.021(3) 0.028(3) 
O4W 0.085(4) 0.045(3) 0.054(3) -0.001(3) -0.012(3) 0.005(3) 
O5W 0.077(5) 0.037(3) 0.058(4) 0.016(3) -0.011(3) 0.018(3) 
O6W 0.102(6) 0.069(4) 0.040(3) -0.013(3) -0.020(4) 0.027(4) 
O7W 0.054(4) 0.031(3) 0.076(4) -0.011(3) -0.018(3) -0.010(2) 
S1 0.0388(4) 0.0389(4) 0.0335(4) -0.0098(3) -0.0118(3) -0.0092(3) 
S2 0.0366(4) 0.0388(4) 0.0376(4) -0.0148(3) -0.0128(3) -0.0092(3) 
S3 0.0501(5) 0.0417(4) 0.0440(4) -0.0148(4) -0.0161(4) -0.0023(4) 
S4 0.0446(4) 0.0345(4) 0.0438(4) -0.0114(3) -0.0182(3) 0.0102(3) 
 
_geom_special_details 
; 
 All esds (except the esd in the dihedral angle between two l.s. planes) 
 are estimated using the full covariance matrix.  The cell esds are taken 
 into account individually in the estimation of esds in distances, angles 
 and torsion angles; correlations between esds in cell parameters are only 
 used when they are defined by crystal symmetry.  An approximate (isotropic) 
 treatment of cell esds is used for estimating esds involving l.s. planes. 
; 
 
loop_ 
 _geom_bond_atom_site_label_1 
 _geom_bond_atom_site_label_2 
 _geom_bond_distance 
 _geom_bond_site_symmetry_2 
 _geom_bond_publ_flag 
B1 C4 1.537(4) . ? 
B1 N5 1.569(3) . ? 
B1 N3 1.615(3) . ? 
B1 N1 1.645(3) . ? 
C1 C2 1.520(5) . ? 
C1 H1A 0.9600 . ? 
C1 H1B 0.9600 . ? 
C1 H1C 0.9600 . ? 
C2 C3 1.498(4) . ? 
C2 C4 1.559(4) . ? 
C2 H2 0.9800 . ? 
C3 H3A 0.9600 . ? 
C3 H3B 0.9600 . ? 
C3 H3C 0.9600 . ? 
C4 H4A 0.9700 . ? 
C4 H4B 0.9700 . ? 
C5 N1 1.362(3) . ? 
C5 C6 1.416(4) . ? 
C5 H5 0.9300 . ? 
C6 C7 1.417(4) . ? 
C6 H6 0.9300 . ? 
C7 N2 1.411(3) . ? 
C7 H7 0.9300 . ? 
C8 N3 1.353(3) . ? 
C8 C9 1.400(4) . ? 
C8 H8 0.9300 . ? 
C9 C10 1.377(4) . ? 
C9 H9 0.9300 . ? 
C10 N4 1.304(3) . ? 
C10 H10 0.9300 . ? 
C11 N5 1.315(3) . ? 
C11 C12 1.381(4) . ? 
C11 H11 0.9301 . ? 
C12 C13 1.330(4) . ? 
C12 H12 0.9300 . ? 
C13 N6 1.340(3) . ? 
C13 H13 0.9300 . ? 
C14 N7 1.115(3) . ? 
C14 Fe1 1.942(3) . ? 
C15 N8 1.153(3) . ? 
C15 Fe1 1.912(3) . ? 
C16 N9 1.158(3) . ? 
C16 Fe1 1.900(3) . ? 
C17 C18 1.366(4) . ? 
C17 N10 1.382(3) . ? 
C17 H17 0.9300 . ? 
C18 C19 1.351(4) . ? 
C18 H18 0.9300 . ? 
C19 C20 1.341(4) . ? 
C19 H19 0.9300 . ? 
C20 C21 1.393(4) . ? 
C20 H20 0.9300 . ? 
C21 N10 1.358(3) . ? 
C21 C27 1.508(4) . ? 
C22 N11 1.351(3) . ? 
C22 C23 1.381(4) . ? 
C22 H22 0.9300 . ? 
C23 C24 1.445(4) . ? 
C23 H23 0.9300 . ? 
C24 C25 1.347(4) . ? 
C24 H24 0.9300 . ? 
C25 C26 1.382(4) . ? 
C25 H25 0.9300 . ? 
C26 N11 1.311(3) . ? 
C26 C27 1.483(4) . ? 
C27 C28 1.366(4) . ? 
C28 S1 1.748(3) . ? 
C28 S2 1.756(3) . ? 
C29 C30 1.347(4) . ? 
C29 C31 1.467(4) . ? 
C29 S1 1.749(3) . ? 
C30 C33 1.485(4) . ? 
C30 S2 1.748(3) . ? 
C31 O1 1.207(3) . ? 
C31 O2 1.286(3) . ? 
C32 O2 1.463(3) . ? 
C32 H32A 0.9600 . ? 
C32 H32B 0.9600 . ? 
C32 H32C 0.9600 . ? 
C33 O3 1.136(3) . ? 
C33 O4 1.309(3) . ? 
C34 O4 1.518(3) . ? 
C34 H34A 0.9600 . ? 
C34 H34B 0.9600 . ? 
C34 H34C 0.9600 . ? 
C35 N12 1.354(3) . ? 
C35 C36 1.360(4) . ? 
C35 H35 0.9300 . ? 
C36 C37 1.411(4) . ? 
C36 H36 0.9300 . ? 
C37 C38 1.402(4) . ? 
C37 H37 0.9300 . ? 
C38 C39 1.408(4) . ? 
C38 H38 0.9300 . ? 
C39 N12 1.382(3) . ? 
C39 C45 1.503(3) . ? 
C40 N13 1.293(3) . ? 
C40 C41 1.417(3) . ? 
C40 H40 0.9300 . ? 
C41 C42 1.391(5) . ? 
C41 H41 0.9300 . ? 
C42 C43 1.323(4) . ? 
C42 H42 0.9300 . ? 
C43 C44 1.410(4) . ? 
C43 H43 0.9300 . ? 
C44 N13 1.321(4) . ? 
C44 C45 1.479(5) . ? 
C45 C46 1.362(4) . ? 
C46 S4 1.740(3) . ? 
C46 S3 1.765(3) . ? 
C47 C48 1.348(4) . ? 
C47 C49 1.470(5) . ? 
C47 S3 1.755(3) . ? 
C48 C51 1.471(4) . ? 
C48 S4 1.769(3) . ? 
C49 O5 1.234(4) . ? 
C49 O6 1.279(4) . ? 
C50 O5 1.668(4) . ? 
C50 H50A 0.9600 . ? 
C50 H50B 0.9600 . ? 
C50 H50C 0.9600 . ? 
C51 O8 1.171(4) . ? 
C51 O7 1.262(4) . ? 
C52 O7 1.492(4) . ? 
C52 H52A 0.9600 . ? 
C52 H52B 0.9600 . ? 
C52 H52C 0.9600 . ? 
Cl1 O14 1.396(5) . ? 
Cl1 O14 1.396(5) 2_666 ? 
Cl1 O11 1.398(5) 2_666 ? 
Cl1 O11 1.398(5) . ? 
Cl1 O13 1.404(5) 2_666 ? 
Cl1 O13 1.404(5) . ? 
Cl1 O12 1.449(5) 2_666 ? 
Cl1 O12 1.449(5) . ? 
Cl2 O21 1.399(8) . ? 
Cl2 O23 1.416(8) . ? 
Cl2 O24 1.420(8) . ? 
Cl2 O22 1.440(8) . ? 
Fe1 N2 1.928(2) . ? 
Fe1 N4 1.940(2) . ? 
Fe1 N6 1.978(2) . ? 
N1 N2 1.331(3) . ? 
N3 N4 1.377(3) . ? 
N5 N6 1.337(3) . ? 
N7 Ni1 2.082(2) 2_676 ? 
N9 Ni1 2.064(3) . ? 
N10 Ni1 2.109(2) . ? 
N11 Ni1 2.128(2) . ? 
N12 Ni1 2.073(3) . ? 
N13 Ni1 2.126(2) . ? 
Ni1 N7 2.082(2) 2_676 ? 
O11 O12 1.514(7) 2_666 ? 
O11 O14 1.624(8) 2_666 ? 
O11 O13 1.776(7) 2_666 ? 
O12 O11 1.514(7) 2_666 ? 
O12 O14 1.674(7) 2_666 ? 
O12 O13 1.678(8) 2_666 ? 
O13 O14 1.502(7) 2_666 ? 
O13 O12 1.678(8) 2_666 ? 
O13 O11 1.776(7) 2_666 ? 
O14 O13 1.502(7) 2_666 ? 
O14 O11 1.624(8) 2_666 ? 
O14 O12 1.674(7) 2_666 ? 
O1W H1X 0.8501 . ? 
O1W H1Y 0.8499 . ? 
O2W H2X 0.8499 . ? 
O2W H2Y 0.8500 . ? 
O3W H3X 0.8499 . ? 
O3W H3Y 0.8499 . ? 
O4W H4X 0.8501 . ? 
O4W H4Y 0.8502 . ? 
O5W H5X 0.8501 . ? 
O5W H5Y 0.8501 . ? 
O6W H6X 0.8501 . ? 
O6W H6Y 0.8500 . ? 
O7W H7X 0.8500 . ? 
O7W H7Y 0.8500 . ? 
 
loop_ 
 _geom_angle_atom_site_label_1 
 _geom_angle_atom_site_label_2 
 _geom_angle_atom_site_label_3 
 _geom_angle 
 _geom_angle_site_symmetry_1 
 _geom_angle_site_symmetry_3 
 _geom_angle_publ_flag 
C4 B1 N5 121.4(3) . . ? 
C4 B1 N3 118.1(2) . . ? 
N5 B1 N3 104.49(19) . . ? 
C4 B1 N1 110.5(2) . . ? 
N5 B1 N1 100.01(17) . . ? 
N3 B1 N1 98.67(18) . . ? 
C2 C1 H1A 109.5 . . ? 
C2 C1 H1B 109.5 . . ? 
H1A C1 H1B 109.5 . . ? 
C2 C1 H1C 109.5 . . ? 
H1A C1 H1C 109.5 . . ? 
H1B C1 H1C 109.5 . . ? 
C3 C2 C1 104.6(3) . . ? 
C3 C2 C4 114.7(3) . . ? 
C1 C2 C4 107.5(3) . . ? 
C3 C2 H2 110.9 . . ? 
C1 C2 H2 109.8 . . ? 
C4 C2 H2 109.2 . . ? 
C2 C3 H3A 109.5 . . ? 
C2 C3 H3B 109.5 . . ? 
H3A C3 H3B 109.5 . . ? 
C2 C3 H3C 109.5 . . ? 
H3A C3 H3C 109.5 . . ? 
H3B C3 H3C 109.5 . . ? 
B1 C4 C2 123.8(3) . . ? 
B1 C4 H4A 106.4 . . ? 
C2 C4 H4A 106.4 . . ? 
B1 C4 H4B 106.4 . . ? 
C2 C4 H4B 106.4 . . ? 
H4A C4 H4B 106.5 . . ? 
N1 C5 C6 108.7(2) . . ? 
N1 C5 H5 125.7 . . ? 
C6 C5 H5 125.7 . . ? 
C5 C6 C7 104.6(3) . . ? 
C5 C6 H6 127.7 . . ? 
C7 C6 H6 127.7 . . ? 
N2 C7 C6 108.2(2) . . ? 
N2 C7 H7 125.9 . . ? 
C6 C7 H7 125.9 . . ? 
N3 C8 C9 104.4(2) . . ? 
N3 C8 H8 127.8 . . ? 
C9 C8 H8 127.8 . . ? 
C10 C9 C8 107.6(3) . . ? 
C10 C9 H9 126.2 . . ? 
C8 C9 H9 126.2 . . ? 
N4 C10 C9 110.0(2) . . ? 
N4 C10 H10 125.0 . . ? 
C9 C10 H10 125.0 . . ? 
N5 C11 C12 116.0(3) . . ? 
N5 C11 H11 121.0 . . ? 
C12 C11 H11 123.0 . . ? 
C13 C12 C11 99.4(3) . . ? 
C13 C12 H12 130.3 . . ? 
C11 C12 H12 130.3 . . ? 
C12 C13 N6 112.6(3) . . ? 
C12 C13 H13 123.7 . . ? 
N6 C13 H13 123.7 . . ? 
N7 C14 Fe1 175.5(3) . . ? 
N8 C15 Fe1 177.6(2) . . ? 
N9 C16 Fe1 177.9(2) . . ? 
C18 C17 N10 122.0(2) . . ? 
C18 C17 H17 119.0 . . ? 
N10 C17 H17 119.0 . . ? 
C19 C18 C17 118.9(3) . . ? 
C19 C18 H18 120.6 . . ? 
C17 C18 H18 120.6 . . ? 
C20 C19 C18 121.0(3) . . ? 
C20 C19 H19 119.5 . . ? 
C18 C19 H19 119.5 . . ? 
C19 C20 C21 120.2(3) . . ? 
C19 C20 H20 119.9 . . ? 
C21 C20 H20 119.9 . . ? 
N10 C21 C20 120.3(2) . . ? 
N10 C21 C27 117.1(2) . . ? 
C20 C21 C27 122.6(3) . . ? 
N11 C22 C23 123.6(2) . . ? 
N11 C22 H22 118.2 . . ? 
C23 C22 H22 118.2 . . ? 
C22 C23 C24 114.9(3) . . ? 
C22 C23 H23 122.5 . . ? 
C24 C23 H23 122.5 . . ? 
C25 C24 C23 120.4(3) . . ? 
C25 C24 H24 119.8 . . ? 
C23 C24 H24 119.8 . . ? 
C24 C25 C26 119.3(3) . . ? 
C24 C25 H25 120.4 . . ? 
C26 C25 H25 120.4 . . ? 
N11 C26 C25 122.4(2) . . ? 
N11 C26 C27 117.5(2) . . ? 
C25 C26 C27 120.0(2) . . ? 
C28 C27 C26 125.2(2) . . ? 
C28 C27 C21 117.7(2) . . ? 
C26 C27 C21 116.7(2) . . ? 
C27 C28 S1 123.3(2) . . ? 
C27 C28 S2 122.4(2) . . ? 
S1 C28 S2 113.81(14) . . ? 
C30 C29 C31 126.8(3) . . ? 
C30 C29 S1 117.1(2) . . ? 
C31 C29 S1 116.1(2) . . ? 
C29 C30 C33 121.6(2) . . ? 
C29 C30 S2 116.8(2) . . ? 
C33 C30 S2 121.0(2) . . ? 
O1 C31 O2 124.0(2) . . ? 
O1 C31 C29 125.0(3) . . ? 
O2 C31 C29 110.7(2) . . ? 
O2 C32 H32A 109.5 . . ? 
O2 C32 H32B 109.5 . . ? 
H32A C32 H32B 109.5 . . ? 
O2 C32 H32C 109.5 . . ? 
H32A C32 H32C 109.5 . . ? 
H32B C32 H32C 109.5 . . ? 
O3 C33 O4 125.8(2) . . ? 
O3 C33 C30 125.9(3) . . ? 
O4 C33 C30 108.3(2) . . ? 
O4 C34 H34A 109.5 . . ? 
O4 C34 H34B 109.5 . . ? 
H34A C34 H34B 109.5 . . ? 
O4 C34 H34C 109.5 . . ? 
H34A C34 H34C 109.5 . . ? 
H34B C34 H34C 109.5 . . ? 
N12 C35 C36 124.7(3) . . ? 
N12 C35 H35 117.6 . . ? 
C36 C35 H35 117.6 . . ? 
C35 C36 C37 119.8(3) . . ? 
C35 C36 H36 120.1 . . ? 
C37 C36 H36 120.1 . . ? 
C38 C37 C36 117.8(3) . . ? 
C38 C37 H37 121.1 . . ? 
C36 C37 H37 121.1 . . ? 
C37 C38 C39 118.7(3) . . ? 
C37 C38 H38 120.7 . . ? 
C39 C38 H38 120.7 . . ? 
N12 C39 C38 123.0(2) . . ? 
N12 C39 C45 117.3(2) . . ? 
C38 C39 C45 119.7(2) . . ? 
N13 C40 C41 124.5(2) . . ? 
N13 C40 H40 117.7 . . ? 
C41 C40 H40 117.7 . . ? 
C42 C41 C40 111.4(3) . . ? 
C42 C41 H41 124.3 . . ? 
C40 C41 H41 124.3 . . ? 
C43 C42 C41 127.1(3) . . ? 
C43 C42 H42 116.4 . . ? 
C41 C42 H42 116.4 . . ? 
C42 C43 C44 114.2(3) . . ? 
C42 C43 H43 122.9 . . ? 
C44 C43 H43 122.9 . . ? 
N13 C44 C43 122.4(3) . . ? 
N13 C44 C45 120.2(2) . . ? 
C43 C44 C45 116.6(3) . . ? 
C46 C45 C44 121.6(3) . . ? 
C46 C45 C39 119.3(3) . . ? 
C44 C45 C39 118.9(2) . . ? 
C45 C46 S4 123.5(2) . . ? 
C45 C46 S3 123.6(2) . . ? 
S4 C46 S3 112.90(17) . . ? 
C48 C47 C49 125.6(3) . . ? 
C48 C47 S3 116.3(3) . . ? 
C49 C47 S3 117.8(2) . . ? 
C47 C48 C51 124.5(3) . . ? 
C47 C48 S4 116.7(2) . . ? 
C51 C48 S4 118.8(2) . . ? 
O5 C49 O6 126.3(3) . . ? 
O5 C49 C47 114.9(3) . . ? 
O6 C49 C47 118.8(3) . . ? 
O5 C50 H50A 109.5 . . ? 
O5 C50 H50B 109.5 . . ? 
H50A C50 H50B 109.5 . . ? 
O5 C50 H50C 109.5 . . ? 
H50A C50 H50C 109.5 . . ? 
H50B C50 H50C 109.5 . . ? 
O8 C51 O7 124.6(3) . . ? 
O8 C51 C48 121.5(3) . . ? 
O7 C51 C48 113.8(3) . . ? 
O7 C52 H52A 109.5 . . ? 
O7 C52 H52B 109.5 . . ? 
H52A C52 H52B 109.5 . . ? 
O7 C52 H52C 109.5 . . ? 
H52A C52 H52C 109.5 . . ? 
H52B C52 H52C 109.5 . . ? 
O14 Cl1 O14 180.00(18) . 2_666 ? 
O14 Cl1 O11 71.1(3) . 2_666 ? 
O14 Cl1 O11 108.9(3) 2_666 2_666 ? 
O14 Cl1 O11 108.9(3) . . ? 
O14 Cl1 O11 71.1(3) 2_666 . ? 
O11 Cl1 O11 180.0(5) 2_666 . ? 
O14 Cl1 O13 64.9(3) . 2_666 ? 
O14 Cl1 O13 115.1(3) 2_666 2_666 ? 
O11 Cl1 O13 101.3(3) 2_666 2_666 ? 
O11 Cl1 O13 78.7(3) . 2_666 ? 
O14 Cl1 O13 115.1(3) . . ? 
O14 Cl1 O13 64.9(3) 2_666 . ? 
O11 Cl1 O13 78.7(3) 2_666 . ? 
O11 Cl1 O13 101.3(3) . . ? 
O13 Cl1 O13 180.000(2) 2_666 . ? 
O14 Cl1 O12 72.1(3) . 2_666 ? 
O14 Cl1 O12 107.9(3) 2_666 2_666 ? 
O11 Cl1 O12 115.8(3) 2_666 2_666 ? 
O11 Cl1 O12 64.2(3) . 2_666 ? 
O13 Cl1 O12 108.0(3) 2_666 2_666 ? 
O13 Cl1 O12 72.0(3) . 2_666 ? 
O14 Cl1 O12 107.9(3) . . ? 
O14 Cl1 O12 72.1(3) 2_666 . ? 
O11 Cl1 O12 64.2(3) 2_666 . ? 
O11 Cl1 O12 115.8(3) . . ? 
O13 Cl1 O12 72.0(3) 2_666 . ? 
O13 Cl1 O12 108.0(3) . . ? 
O12 Cl1 O12 180.0(4) 2_666 . ? 
O21 Cl2 O23 102.1(6) . . ? 
O21 Cl2 O24 107.9(6) . . ? 
O23 Cl2 O24 118.1(6) . . ? 
O21 Cl2 O22 115.4(6) . . ? 
O23 Cl2 O22 107.5(6) . . ? 
O24 Cl2 O22 106.3(6) . . ? 
C16 Fe1 C15 86.07(13) . . ? 
C16 Fe1 N2 92.98(9) . . ? 
C15 Fe1 N2 178.01(9) . . ? 
C16 Fe1 N4 91.53(8) . . ? 
C15 Fe1 N4 94.12(8) . . ? 
N2 Fe1 N4 87.65(10) . . ? 
C16 Fe1 C14 87.13(11) . . ? 
C15 Fe1 C14 86.78(12) . . ? 
N2 Fe1 C14 91.43(9) . . ? 
N4 Fe1 C14 178.33(9) . . ? 
C16 Fe1 N6 178.73(8) . . ? 
C15 Fe1 N6 93.55(10) . . ? 
N2 Fe1 N6 87.44(10) . . ? 
N4 Fe1 N6 87.28(9) . . ? 
C14 Fe1 N6 94.06(8) . . ? 
N2 N1 C5 110.84(19) . . ? 
N2 N1 B1 120.05(18) . . ? 
C5 N1 B1 129.11(17) . . ? 
N1 N2 C7 107.55(18) . . ? 
N1 N2 Fe1 124.24(18) . . ? 
C7 N2 Fe1 128.18(14) . . ? 
C8 N3 N4 111.00(19) . . ? 
C8 N3 B1 126.69(18) . . ? 
N4 N3 B1 122.27(17) . . ? 
C10 N4 N3 106.85(18) . . ? 
C10 N4 Fe1 132.40(15) . . ? 
N3 N4 Fe1 120.62(17) . . ? 
C11 N5 N6 102.93(18) . . ? 
C11 N5 B1 133.54(19) . . ? 
N6 N5 B1 123.53(19) . . ? 
N5 N6 C13 109.05(19) . . ? 
N5 N6 Fe1 120.67(17) . . ? 
C13 N6 Fe1 129.57(14) . . ? 
C14 N7 Ni1 178.32(18) . 2_676 ? 
C16 N9 Ni1 178.15(19) . . ? 
C21 N10 C17 117.62(17) . . ? 
C21 N10 Ni1 122.58(14) . . ? 
C17 N10 Ni1 118.80(14) . . ? 
C26 N11 C22 119.15(17) . . ? 
C26 N11 Ni1 123.87(15) . . ? 
C22 N11 Ni1 116.65(13) . . ? 
C35 N12 C39 115.91(18) . . ? 
C35 N12 Ni1 120.57(15) . . ? 
C39 N12 Ni1 123.44(14) . . ? 
C40 N13 C44 119.8(2) . . ? 
C40 N13 Ni1 118.30(14) . . ? 
C44 N13 Ni1 121.8(2) . . ? 
N9 Ni1 N12 87.30(10) . . ? 
N9 Ni1 N7 91.45(9) . 2_676 ? 
N12 Ni1 N7 90.59(9) . 2_676 ? 
N9 Ni1 N10 91.77(10) . . ? 
N12 Ni1 N10 178.18(9) . . ? 
N7 Ni1 N10 87.87(9) 2_676 . ? 
N9 Ni1 N13 88.76(9) . . ? 
N12 Ni1 N13 87.38(9) . . ? 
N7 Ni1 N13 177.95(9) 2_676 . ? 
N10 Ni1 N13 94.16(9) . . ? 
N9 Ni1 N11 177.33(10) . . ? 
N12 Ni1 N11 95.36(10) . . ? 
N7 Ni1 N11 88.76(9) 2_676 . ? 
N10 Ni1 N11 85.58(9) . . ? 
N13 Ni1 N11 91.12(9) . . ? 
C31 O2 C32 118.05(18) . . ? 
C33 O4 C34 117.77(18) . . ? 
C49 O5 C50 114.6(3) . . ? 
C51 O7 C52 121.2(2) . . ? 
Cl1 O11 O12 59.5(3) . 2_666 ? 
Cl1 O11 O14 54.4(3) . 2_666 ? 
O12 O11 O14 94.2(4) 2_666 2_666 ? 
Cl1 O11 O13 50.8(2) . 2_666 ? 
O12 O11 O13 88.7(3) 2_666 2_666 ? 
O14 O11 O13 87.9(4) 2_666 2_666 ? 
Cl1 O12 O11 56.3(3) . 2_666 ? 
Cl1 O12 O14 52.5(2) . 2_666 ? 
O11 O12 O14 90.8(4) 2_666 2_666 ? 
Cl1 O12 O13 52.8(3) . 2_666 ? 
O11 O12 O13 85.4(4) 2_666 2_666 ? 
O14 O12 O13 89.6(4) 2_666 2_666 ? 
Cl1 O13 O14 57.3(3) . 2_666 ? 
Cl1 O13 O12 55.2(2) . 2_666 ? 
O14 O13 O12 92.5(4) 2_666 2_666 ? 
Cl1 O13 O11 50.5(2) . 2_666 ? 
O14 O13 O11 87.4(4) 2_666 2_666 ? 
O12 O13 O11 88.5(3) 2_666 2_666 ? 
Cl1 O14 O13 57.8(3) . 2_666 ? 
Cl1 O14 O11 54.5(3) . 2_666 ? 
O13 O14 O11 87.7(4) 2_666 2_666 ? 
Cl1 O14 O12 55.4(2) . 2_666 ? 
O13 O14 O12 93.0(4) 2_666 2_666 ? 
O11 O14 O12 93.9(4) 2_666 2_666 ? 
H1X O1W H1Y 109.5 . . ? 
H2X O2W H2Y 109.5 . . ? 
H3X O3W H3Y 109.5 . . ? 
H4X O4W H4Y 109.5 . . ? 
H5X O5W H5Y 109.5 . . ? 
H6X O6W H6Y 106.0 . . ? 
H7X O7W H7Y 109.5 . . ? 
C28 S1 C29 95.91(13) . . ? 
C30 S2 C28 96.01(13) . . ? 
C47 S3 C46 95.65(15) . . ? 
C46 S4 C48 95.39(14) . . ? 
 
loop_ 
 _geom_torsion_atom_site_label_1 
 _geom_torsion_atom_site_label_2 
 _geom_torsion_atom_site_label_3 
 _geom_torsion_atom_site_label_4 
 _geom_torsion 
 _geom_torsion_site_symmetry_1 
 _geom_torsion_site_symmetry_2 
 _geom_torsion_site_symmetry_3 
 _geom_torsion_site_symmetry_4 
 _geom_torsion_publ_flag 
N5 B1 C4 C2 38.1(4) . . . . ? 
N3 B1 C4 C2 -93.0(3) . . . . ? 
N1 B1 C4 C2 154.5(3) . . . . ? 
C3 C2 C4 B1 169.7(3) . . . . ? 
C1 C2 C4 B1 53.8(4) . . . . ? 
N1 C5 C6 C7 1.8(3) . . . . ? 
C5 C6 C7 N2 -1.5(3) . . . . ? 
N3 C8 C9 C10 1.0(3) . . . . ? 
C8 C9 C10 N4 0.9(3) . . . . ? 
N5 C11 C12 C13 0.4(4) . . . . ? 
C11 C12 C13 N6 0.4(3) . . . . ? 
N10 C17 C18 C19 1.9(4) . . . . ? 
C17 C18 C19 C20 -0.8(4) . . . . ? 
C18 C19 C20 C21 1.0(4) . . . . ? 
C19 C20 C21 N10 -2.1(4) . . . . ? 
C19 C20 C21 C27 178.9(3) . . . . ? 
N11 C22 C23 C24 -1.0(4) . . . . ? 
C22 C23 C24 C25 4.2(4) . . . . ? 
C23 C24 C25 C26 -3.2(4) . . . . ? 
C24 C25 C26 N11 -1.2(4) . . . . ? 
C24 C25 C26 C27 177.0(2) . . . . ? 
N11 C26 C27 C28 -141.5(2) . . . . ? 
C25 C26 C27 C28 40.2(4) . . . . ? 
N11 C26 C27 C21 46.2(3) . . . . ? 
C25 C26 C27 C21 -132.0(3) . . . . ? 
N10 C21 C27 C28 125.4(3) . . . . ? 
C20 C21 C27 C28 -55.5(4) . . . . ? 
N10 C21 C27 C26 -61.7(3) . . . . ? 
C20 C21 C27 C26 117.4(3) . . . . ? 
C26 C27 C28 S1 6.3(4) . . . . ? 
C21 C27 C28 S1 178.55(19) . . . . ? 
C26 C27 C28 S2 177.7(2) . . . . ? 
C21 C27 C28 S2 -10.0(3) . . . . ? 
C31 C29 C30 C33 -3.5(5) . . . . ? 
S1 C29 C30 C33 175.8(2) . . . . ? 
C31 C29 C30 S2 -174.3(2) . . . . ? 
S1 C29 C30 S2 5.0(3) . . . . ? 
C30 C29 C31 O1 -83.4(4) . . . . ? 
S1 C29 C31 O1 97.3(3) . . . . ? 
C30 C29 C31 O2 90.8(4) . . . . ? 
S1 C29 C31 O2 -88.5(3) . . . . ? 
C29 C30 C33 O3 2.0(5) . . . . ? 
S2 C30 C33 O3 172.4(2) . . . . ? 
C29 C30 C33 O4 -177.5(3) . . . . ? 
S2 C30 C33 O4 -7.1(3) . . . . ? 
N12 C35 C36 C37 1.0(5) . . . . ? 
C35 C36 C37 C38 -1.4(5) . . . . ? 
C36 C37 C38 C39 2.6(5) . . . . ? 
C37 C38 C39 N12 -3.4(5) . . . . ? 
C37 C38 C39 C45 178.1(3) . . . . ? 
N13 C40 C41 C42 -0.5(3) . . . . ? 
C40 C41 C42 C43 5.4(5) . . . . ? 
C41 C42 C43 C44 -9.1(5) . . . . ? 
C42 C43 C44 N13 8.5(5) . . . . ? 
C42 C43 C44 C45 178.6(3) . . . . ? 
N13 C44 C45 C46 -130.6(3) . . . . ? 
C43 C44 C45 C46 59.0(4) . . . . ? 
N13 C44 C45 C39 44.8(4) . . . . ? 
C43 C44 C45 C39 -125.5(3) . . . . ? 
N12 C39 C45 C46 123.2(3) . . . . ? 
C38 C39 C45 C46 -58.2(3) . . . . ? 
N12 C39 C45 C44 -52.4(3) . . . . ? 
C38 C39 C45 C44 126.2(3) . . . . ? 
C44 C45 C46 S4 -2.1(4) . . . . ? 
C39 C45 C46 S4 -177.53(18) . . . . ? 
C44 C45 C46 S3 178.4(2) . . . . ? 
C39 C45 C46 S3 2.9(4) . . . . ? 
C49 C47 C48 C51 6.5(5) . . . . ? 
S3 C47 C48 C51 179.3(2) . . . . ? 
C49 C47 C48 S4 -174.1(3) . . . . ? 
S3 C47 C48 S4 -1.2(3) . . . . ? 
C48 C47 C49 O5 -139.7(3) . . . . ? 
S3 C47 C49 O5 47.6(4) . . . . ? 
C48 C47 C49 O6 37.6(5) . . . . ? 
S3 C47 C49 O6 -135.1(3) . . . . ? 
C47 C48 C51 O8 -137.5(4) . . . . ? 
S4 C48 C51 O8 43.1(4) . . . . ? 
C47 C48 C51 O7 46.3(4) . . . . ? 
S4 C48 C51 O7 -133.1(3) . . . . ? 
N9 C16 Fe1 C15 5(6) . . . . ? 
N9 C16 Fe1 N2 -173(6) . . . . ? 
N9 C16 Fe1 N4 99(6) . . . . ? 
N9 C16 Fe1 C14 -82(6) . . . . ? 
N9 C16 Fe1 N6 77(8) . . . . ? 
N8 C15 Fe1 C16 -96(7) . . . . ? 
N8 C15 Fe1 N2 -35(9) . . . . ? 
N8 C15 Fe1 N4 173(7) . . . . ? 
N8 C15 Fe1 C14 -9(7) . . . . ? 
N8 C15 Fe1 N6 85(7) . . . . ? 
N7 C14 Fe1 C16 116(3) . . . . ? 
N7 C14 Fe1 C15 30(3) . . . . ? 
N7 C14 Fe1 N2 -151(3) . . . . ? 
N7 C14 Fe1 N4 153(3) . . . . ? 
N7 C14 Fe1 N6 -63(3) . . . . ? 
C6 C5 N1 N2 -1.6(2) . . . . ? 
C6 C5 N1 B1 178.7(2) . . . . ? 
C4 B1 N1 N2 178.81(17) . . . . ? 
N5 B1 N1 N2 -52.1(2) . . . . ? 
N3 B1 N1 N2 54.4(2) . . . . ? 
C4 B1 N1 C5 -1.4(3) . . . . ? 
N5 B1 N1 C5 127.6(2) . . . . ? 
N3 B1 N1 C5 -125.9(2) . . . . ? 
C5 N1 N2 C7 0.6(2) . . . . ? 
B1 N1 N2 C7 -179.61(18) . . . . ? 
C5 N1 N2 Fe1 178.84(13) . . . . ? 
B1 N1 N2 Fe1 -1.4(3) . . . . ? 
C6 C7 N2 N1 0.6(2) . . . . ? 
C6 C7 N2 Fe1 -177.55(15) . . . . ? 
C16 Fe1 N2 N1 -135.5(2) . . . . ? 
C15 Fe1 N2 N1 163(3) . . . . ? 
N4 Fe1 N2 N1 -44.1(2) . . . . ? 
C14 Fe1 N2 N1 137.3(2) . . . . ? 
N6 Fe1 N2 N1 43.3(2) . . . . ? 
C16 Fe1 N2 C7 42.34(17) . . . . ? 
C15 Fe1 N2 C7 -19(3) . . . . ? 
N4 Fe1 N2 C7 133.75(18) . . . . ? 
C14 Fe1 N2 C7 -44.86(17) . . . . ? 
N6 Fe1 N2 C7 -138.86(18) . . . . ? 
C9 C8 N3 N4 -2.6(3) . . . . ? 
C9 C8 N3 B1 179.8(2) . . . . ? 
C4 B1 N3 C8 2.2(4) . . . . ? 
N5 B1 N3 C8 -136.1(2) . . . . ? 
N1 B1 N3 C8 121.1(2) . . . . ? 
C4 B1 N3 N4 -175.16(19) . . . . ? 
N5 B1 N3 N4 46.5(2) . . . . ? 
N1 B1 N3 N4 -56.3(2) . . . . ? 
C9 C10 N4 N3 -2.5(2) . . . . ? 
C9 C10 N4 Fe1 173.14(16) . . . . ? 
C8 N3 N4 C10 3.2(3) . . . . ? 
B1 N3 N4 C10 -179.01(19) . . . . ? 
C8 N3 N4 Fe1 -173.02(14) . . . . ? 
B1 N3 N4 Fe1 4.8(3) . . . . ? 
C16 Fe1 N4 C10 -40.7(2) . . . . ? 
C15 Fe1 N4 C10 45.5(2) . . . . ? 
N2 Fe1 N4 C10 -133.6(2) . . . . ? 
C14 Fe1 N4 C10 -77(3) . . . . ? 
N6 Fe1 N4 C10 138.8(2) . . . . ? 
C16 Fe1 N4 N3 134.4(2) . . . . ? 
C15 Fe1 N4 N3 -139.4(2) . . . . ? 
N2 Fe1 N4 N3 41.5(2) . . . . ? 
C14 Fe1 N4 N3 98(3) . . . . ? 
N6 Fe1 N4 N3 -46.0(2) . . . . ? 
C12 C11 N5 N6 -1.0(3) . . . . ? 
C12 C11 N5 B1 179.7(2) . . . . ? 
C4 B1 N5 C11 -1.7(4) . . . . ? 
N3 B1 N5 C11 135.0(2) . . . . ? 
N1 B1 N5 C11 -123.3(2) . . . . ? 
C4 B1 N5 N6 179.1(2) . . . . ? 
N3 B1 N5 N6 -44.3(2) . . . . ? 
N1 B1 N5 N6 57.5(2) . . . . ? 
C11 N5 N6 C13 1.2(2) . . . . ? 
B1 N5 N6 C13 -179.4(2) . . . . ? 
C11 N5 N6 Fe1 172.39(14) . . . . ? 
B1 N5 N6 Fe1 -8.2(3) . . . . ? 
C12 C13 N6 N5 -1.0(3) . . . . ? 
C12 C13 N6 Fe1 -171.23(18) . . . . ? 
C16 Fe1 N6 N5 71(4) . . . . ? 
C15 Fe1 N6 N5 142.98(19) . . . . ? 
N2 Fe1 N6 N5 -38.7(2) . . . . ? 
N4 Fe1 N6 N5 49.0(2) . . . . ? 
C14 Fe1 N6 N5 -130.00(19) . . . . ? 
C16 Fe1 N6 C13 -120(4) . . . . ? 
C15 Fe1 N6 C13 -47.80(19) . . . . ? 
N2 Fe1 N6 C13 130.47(19) . . . . ? 
N4 Fe1 N6 C13 -141.8(2) . . . . ? 
C14 Fe1 N6 C13 39.22(19) . . . . ? 
Fe1 C14 N7 Ni1 -105(6) . . . 2_676 ? 
Fe1 C16 N9 Ni1 -67(9) . . . . ? 
C20 C21 N10 C17 3.0(3) . . . . ? 
C27 C21 N10 C17 -177.9(2) . . . . ? 
C20 C21 N10 Ni1 -165.4(2) . . . . ? 
C27 C21 N10 Ni1 13.7(3) . . . . ? 
C18 C17 N10 C21 -2.9(3) . . . . ? 
C18 C17 N10 Ni1 165.93(19) . . . . ? 
C25 C26 N11 C22 4.4(3) . . . . ? 
C27 C26 N11 C22 -173.8(2) . . . . ? 
C25 C26 N11 Ni1 -168.81(18) . . . . ? 
C27 C26 N11 Ni1 13.0(3) . . . . ? 
C23 C22 N11 C26 -3.2(3) . . . . ? 
C23 C22 N11 Ni1 170.5(2) . . . . ? 
C36 C35 N12 C39 -1.6(4) . . . . ? 
C36 C35 N12 Ni1 175.4(2) . . . . ? 
C38 C39 N12 C35 2.8(4) . . . . ? 
C45 C39 N12 C35 -178.6(2) . . . . ? 
C38 C39 N12 Ni1 -174.0(2) . . . . ? 
C45 C39 N12 Ni1 4.5(3) . . . . ? 
C41 C40 N13 C44 0.4(3) . . . . ? 
C41 C40 N13 Ni1 177.15(16) . . . . ? 
C43 C44 N13 C40 -4.5(4) . . . . ? 
C45 C44 N13 C40 -174.3(2) . . . . ? 
C43 C44 N13 Ni1 178.8(2) . . . . ? 
C45 C44 N13 Ni1 9.0(4) . . . . ? 
C16 N9 Ni1 N12 -125(6) . . . . ? 
C16 N9 Ni1 N7 145(6) . . . 2_676 ? 
C16 N9 Ni1 N10 57(6) . . . . ? 
C16 N9 Ni1 N13 -37(6) . . . . ? 
C16 N9 Ni1 N11 50(7) . . . . ? 
C35 N12 Ni1 N9 -56.60(18) . . . . ? 
C39 N12 Ni1 N9 120.15(19) . . . . ? 
C35 N12 Ni1 N7 34.83(18) . . . 2_676 ? 
C39 N12 Ni1 N7 -148.43(18) . . . 2_676 ? 
C35 N12 Ni1 N10 2(3) . . . . ? 
C39 N12 Ni1 N10 179(100) . . . . ? 
C35 N12 Ni1 N13 -145.48(18) . . . . ? 
C39 N12 Ni1 N13 31.27(18) . . . . ? 
C35 N12 Ni1 N11 123.64(17) . . . . ? 
C39 N12 Ni1 N11 -59.61(19) . . . . ? 
C21 N10 Ni1 N9 -152.74(16) . . . . ? 
C17 N10 Ni1 N9 38.97(15) . . . . ? 
C21 N10 Ni1 N12 148(3) . . . . ? 
C17 N10 Ni1 N12 -20(3) . . . . ? 
C21 N10 Ni1 N7 115.87(16) . . . 2_676 ? 
C17 N10 Ni1 N7 -52.42(15) . . . 2_676 ? 
C21 N10 Ni1 N13 -63.86(16) . . . . ? 
C17 N10 Ni1 N13 127.85(15) . . . . ? 
C21 N10 Ni1 N11 26.95(16) . . . . ? 
C17 N10 Ni1 N11 -141.34(15) . . . . ? 
C40 N13 Ni1 N9 56.93(16) . . . . ? 
C44 N13 Ni1 N9 -126.3(2) . . . . ? 
C40 N13 Ni1 N12 144.28(16) . . . . ? 
C44 N13 Ni1 N12 -39.0(2) . . . . ? 
C40 N13 Ni1 N7 153(2) . . . 2_676 ? 
C44 N13 Ni1 N7 -30(3) . . . 2_676 ? 
C40 N13 Ni1 N10 -34.76(16) . . . . ? 
C44 N13 Ni1 N10 142.0(2) . . . . ? 
C40 N13 Ni1 N11 -120.41(15) . . . . ? 
C44 N13 Ni1 N11 56.3(2) . . . . ? 
C26 N11 Ni1 N9 -36(2) . . . . ? 
C22 N11 Ni1 N9 150.8(18) . . . . ? 
C26 N11 Ni1 N12 139.12(16) . . . . ? 
C22 N11 Ni1 N12 -34.24(15) . . . . ? 
C26 N11 Ni1 N7 -130.40(17) . . . 2_676 ? 
C22 N11 Ni1 N7 56.24(15) . . . 2_676 ? 
C26 N11 Ni1 N10 -42.44(16) . . . . ? 
C22 N11 Ni1 N10 144.20(14) . . . . ? 
C26 N11 Ni1 N13 51.65(17) . . . . ? 
C22 N11 Ni1 N13 -121.71(14) . . . . ? 
O1 C31 O2 C32 -4.0(4) . . . . ? 
C29 C31 O2 C32 -178.2(2) . . . . ? 
O3 C33 O4 C34 -1.9(4) . . . . ? 
C30 C33 O4 C34 177.6(2) . . . . ? 
O6 C49 O5 C50 23.9(5) . . . . ? 
C47 C49 O5 C50 -159.1(3) . . . . ? 
O8 C51 O7 C52 18.6(5) . . . . ? 
C48 C51 O7 C52 -165.3(3) . . . . ? 
O14 Cl1 O11 O12 58.3(4) . . . 2_666 ? 
O14 Cl1 O11 O12 -121.7(4) 2_666 . . 2_666 ? 
O11 Cl1 O11 O12 -145(100) 2_666 . . 2_666 ? 
O13 Cl1 O11 O12 116.5(4) 2_666 . . 2_666 ? 
O13 Cl1 O11 O12 -63.5(4) . . . 2_666 ? 
O12 Cl1 O11 O12 180.000(2) . . . 2_666 ? 
O14 Cl1 O11 O14 180.0 . . . 2_666 ? 
O11 Cl1 O11 O14 -23(100) 2_666 . . 2_666 ? 
O13 Cl1 O11 O14 -121.8(4) 2_666 . . 2_666 ? 
O13 Cl1 O11 O14 58.2(4) . . . 2_666 ? 
O12 Cl1 O11 O14 121.7(4) 2_666 . . 2_666 ? 
O12 Cl1 O11 O14 -58.3(4) . . . 2_666 ? 
O14 Cl1 O11 O13 -58.2(4) . . . 2_666 ? 
O14 Cl1 O11 O13 121.8(4) 2_666 . . 2_666 ? 
O11 Cl1 O11 O13 99(100) 2_666 . . 2_666 ? 
O13 Cl1 O11 O13 180.000(2) . . . 2_666 ? 
O12 Cl1 O11 O13 -116.5(4) 2_666 . . 2_666 ? 
O12 Cl1 O11 O13 63.5(4) . . . 2_666 ? 
O14 Cl1 O12 O11 -57.7(4) . . . 2_666 ? 
O14 Cl1 O12 O11 122.3(4) 2_666 . . 2_666 ? 
O11 Cl1 O12 O11 180.000(1) . . . 2_666 ? 
O13 Cl1 O12 O11 -112.7(3) 2_666 . . 2_666 ? 
O13 Cl1 O12 O11 67.3(3) . . . 2_666 ? 
O12 Cl1 O12 O11 98(100) 2_666 . . 2_666 ? 
O14 Cl1 O12 O14 180.000(1) . . . 2_666 ? 
O11 Cl1 O12 O14 -122.3(4) 2_666 . . 2_666 ? 
O11 Cl1 O12 O14 57.7(4) . . . 2_666 ? 
O13 Cl1 O12 O14 125.0(3) 2_666 . . 2_666 ? 
O13 Cl1 O12 O14 -55.0(3) . . . 2_666 ? 
O12 Cl1 O12 O14 -24(100) 2_666 . . 2_666 ? 
O14 Cl1 O12 O13 55.0(3) . . . 2_666 ? 
O14 Cl1 O12 O13 -125.0(3) 2_666 . . 2_666 ? 
O11 Cl1 O12 O13 112.7(3) 2_666 . . 2_666 ? 
O11 Cl1 O12 O13 -67.3(3) . . . 2_666 ? 
O13 Cl1 O12 O13 180.000(1) . . . 2_666 ? 
O12 Cl1 O12 O13 -149(100) 2_666 . . 2_666 ? 
O14 Cl1 O13 O14 180.000(3) . . . 2_666 ? 
O11 Cl1 O13 O14 117.3(4) 2_666 . . 2_666 ? 
O11 Cl1 O13 O14 -62.7(4) . . . 2_666 ? 
O13 Cl1 O13 O14 37(100) 2_666 . . 2_666 ? 
O12 Cl1 O13 O14 -120.6(4) 2_666 . . 2_666 ? 
O12 Cl1 O13 O14 59.4(4) . . . 2_666 ? 
O14 Cl1 O13 O12 -59.4(4) . . . 2_666 ? 
O14 Cl1 O13 O12 120.6(4) 2_666 . . 2_666 ? 
O11 Cl1 O13 O12 -122.1(3) 2_666 . . 2_666 ? 
O11 Cl1 O13 O12 57.9(3) . . . 2_666 ? 
O13 Cl1 O13 O12 158(100) 2_666 . . 2_666 ? 
O12 Cl1 O13 O12 180.000(1) . . . 2_666 ? 
O14 Cl1 O13 O11 62.7(4) . . . 2_666 ? 
O14 Cl1 O13 O11 -117.3(4) 2_666 . . 2_666 ? 
O11 Cl1 O13 O11 180.000(2) . . . 2_666 ? 
O13 Cl1 O13 O11 -80(100) 2_666 . . 2_666 ? 
O12 Cl1 O13 O11 122.1(3) 2_666 . . 2_666 ? 
O12 Cl1 O13 O11 -57.9(3) . . . 2_666 ? 
O14 Cl1 O14 O13 -75(100) 2_666 . . 2_666 ? 
O11 Cl1 O14 O13 -113.0(4) 2_666 . . 2_666 ? 
O11 Cl1 O14 O13 67.0(4) . . . 2_666 ? 
O13 Cl1 O14 O13 180.000(2) . . . 2_666 ? 
O12 Cl1 O14 O13 120.6(4) 2_666 . . 2_666 ? 
O12 Cl1 O14 O13 -59.4(4) . . . 2_666 ? 
O14 Cl1 O14 O11 38(100) 2_666 . . 2_666 ? 
O11 Cl1 O14 O11 180.0 . . . 2_666 ? 
O13 Cl1 O14 O11 113.0(4) 2_666 . . 2_666 ? 
O13 Cl1 O14 O11 -67.0(4) . . . 2_666 ? 
O12 Cl1 O14 O11 -126.4(3) 2_666 . . 2_666 ? 
O12 Cl1 O14 O11 53.6(3) . . . 2_666 ? 
O14 Cl1 O14 O12 164(100) 2_666 . . 2_666 ? 
O11 Cl1 O14 O12 126.4(3) 2_666 . . 2_666 ? 
O11 Cl1 O14 O12 -53.6(3) . . . 2_666 ? 
O13 Cl1 O14 O12 -120.6(4) 2_666 . . 2_666 ? 
O13 Cl1 O14 O12 59.4(4) . . . 2_666 ? 
O12 Cl1 O14 O12 180.000(2) . . . 2_666 ? 
C27 C28 S1 C29 177.0(2) . . . . ? 
S2 C28 S1 C29 4.94(17) . . . . ? 
C30 C29 S1 C28 -6.0(3) . . . . ? 
C31 C29 S1 C28 173.3(2) . . . . ? 
C29 C30 S2 C28 -1.2(3) . . . . ? 
C33 C30 S2 C28 -172.1(2) . . . . ? 
C27 C28 S2 C30 -175.0(2) . . . . ? 
S1 C28 S2 C30 -2.88(17) . . . . ? 
C48 C47 S3 C46 -9.3(3) . . . . ? 
C49 C47 S3 C46 164.1(3) . . . . ? 
C45 C46 S3 C47 -163.7(3) . . . . ? 
S4 C46 S3 C47 16.65(19) . . . . ? 
C45 C46 S4 C48 163.3(3) . . . . ? 
S3 C46 S4 C48 -17.05(18) . . . . ? 
C47 C48 S4 C46 11.3(3) . . . . ? 
C51 C48 S4 C46 -169.2(2) . . . . ? 
 
_diffrn_measured_fraction_theta_max    0.974 
_diffrn_reflns_theta_full              26.00 
_diffrn_measured_fraction_theta_full   0.974 
_refine_diff_density_max    0.476 
_refine_diff_density_min   -0.317 
_refine_diff_density_rms    0.054 

#===END
 
data_3 
 
_audit_creation_method            SHELXL-97 
_chemical_name_systematic 
; 
 ? 
; 
_chemical_name_common             ? 
_chemical_melting_point           ? 
_chemical_formula_moiety          ? 
_chemical_formula_sum 
 'C56 H62 B2 Fe2 N22 Ni O8 S8' 
_chemical_formula_weight          1619.79 
 
loop_ 
 _atom_type_symbol 
 _atom_type_description 
 _atom_type_scat_dispersion_real 
 _atom_type_scat_dispersion_imag 
 _atom_type_scat_source 
 'C'  'C'   0.0033   0.0016 
 'International Tables Vol C Tables 4.2.6.8 and 6.1.1.4' 
 'H'  'H'   0.0000   0.0000 
 'International Tables Vol C Tables 4.2.6.8 and 6.1.1.4' 
 'B'  'B'   0.0013   0.0007 
 'International Tables Vol C Tables 4.2.6.8 and 6.1.1.4' 
 'N'  'N'   0.0061   0.0033 
 'International Tables Vol C Tables 4.2.6.8 and 6.1.1.4' 
 'S'  'S'   0.1246   0.1234 
 'International Tables Vol C Tables 4.2.6.8 and 6.1.1.4' 
 'Fe'  'Fe'   0.3463   0.8444 
 'International Tables Vol C Tables 4.2.6.8 and 6.1.1.4' 
 'Ni'  'Ni'   0.3393   1.1124 
 'International Tables Vol C Tables 4.2.6.8 and 6.1.1.4' 
 'O'  'O'   0.0106   0.0060 
 'International Tables Vol C Tables 4.2.6.8 and 6.1.1.4' 
 
_symmetry_cell_setting            monoclinic 
_symmetry_space_group_name_H-M    C2/c 
 
loop_ 
 _symmetry_equiv_pos_as_xyz 
 'x, y, z' 
 '-x, y, -z+1/2' 
 'x+1/2, y+1/2, z' 
 '-x+1/2, y+1/2, -z+1/2' 
 '-x, -y, -z' 
 'x, -y, z-1/2' 
 '-x+1/2, -y+1/2, -z' 
 'x+1/2, -y+1/2, z-1/2' 
 
_cell_length_a                    16.1596(19) 
_cell_length_b                    28.147(4) 
_cell_length_c                    18.708(2) 
_cell_angle_alpha                 90.00 
_cell_angle_beta                  100.344(3) 
_cell_angle_gamma                 90.00 
_cell_volume                      8370.9(18) 
_cell_formula_units_Z             4 
_cell_measurement_temperature     291(2) 
_cell_measurement_reflns_used     2111 
_cell_measurement_theta_min       2.1 
_cell_measurement_theta_max       24.5 
 
_exptl_crystal_description        block
_exptl_crystal_colour             Red 
_exptl_crystal_size_max           0.22 
_exptl_crystal_size_mid           0.21 
_exptl_crystal_size_min           0.20 
_exptl_crystal_density_meas       ? 
_exptl_crystal_density_diffrn     1.285 
_exptl_crystal_density_method     'not measured' 
_exptl_crystal_F_000              3336 
_exptl_absorpt_coefficient_mu     0.822 
_exptl_absorpt_correction_type    'multi-scan'  
_exptl_absorpt_correction_T_min   0.8399 
_exptl_absorpt_correction_T_max   0.8529 
_exptl_absorpt_process_details    'SADABS; Bruker, 2000'
 
_exptl_special_details 
; 
 ? 
; 
 
_diffrn_ambient_temperature       291(2) 
_diffrn_radiation_wavelength      0.71073 
_diffrn_radiation_type            MoK\a 
_diffrn_radiation_source          'fine-focus sealed tube' 
_diffrn_radiation_monochromator   graphite 
_diffrn_measurement_device_type   ? 
_diffrn_measurement_method        ? 
_diffrn_detector_area_resol_mean  ? 
_diffrn_standards_number          ? 
_diffrn_standards_interval_count  ? 
_diffrn_standards_interval_time   ? 
_diffrn_standards_decay_%         ? 
_diffrn_reflns_number             22437 
_diffrn_reflns_av_R_equivalents   0.0616 
_diffrn_reflns_av_sigmaI/netI     0.0854 
_diffrn_reflns_limit_h_min        -14 
_diffrn_reflns_limit_h_max        19 
_diffrn_reflns_limit_k_min        -34 
_diffrn_reflns_limit_k_max        32 
_diffrn_reflns_limit_l_min        -23 
_diffrn_reflns_limit_l_max        15 
_diffrn_reflns_theta_min          1.70 
_diffrn_reflns_theta_max          26.00 
_reflns_number_total              8159 
_reflns_number_gt                 4420 
_reflns_threshold_expression      >2sigma(I) 
 
_computing_data_collection      'SMART (Bruker, 2000)'
_computing_cell_refinement      'SMART'
_computing_data_reduction       'SAINT (Bruker, 2000)'
_computing_structure_solution   'SHELXTL (Bruker, 2000)'
_computing_structure_refinement 'SHELXTL'
_computing_molecular_graphics   'SHELXTL'
_computing_publication_material 'SHELXTL' 
 
_refine_special_details 
; 
 Refinement of F^2^ against ALL reflections.  The weighted R-factor wR and 
 goodness of fit S are based on F^2^, conventional R-factors R are based 
 on F, with F set to zero for negative F^2^. The threshold expression of 
 F^2^ > 2sigma(F^2^) is used only for calculating R-factors(gt) etc. and is 
 not relevant to the choice of reflections for refinement.  R-factors based 
 on F^2^ are statistically about twice as large as those based on F, and R- 
 factors based on ALL data will be even larger. 
; 
 
_refine_ls_structure_factor_coef  Fsqd  
_refine_ls_matrix_type            full 
_refine_ls_weighting_scheme       calc  
_refine_ls_weighting_details 
 'calc w=1/[\s^2^(Fo^2^)+(0.1448P)^2^+0.0000P] where P=(Fo^2^+2Fc^2^)/3' 
_atom_sites_solution_primary      direct 
_atom_sites_solution_secondary    difmap 
_atom_sites_solution_hydrogens    geom 
_refine_ls_hydrogen_treatment     constr 
_refine_ls_extinction_method      none 
_refine_ls_extinction_coef        ? 
_refine_ls_number_reflns          8159 
_refine_ls_number_parameters      484 
_refine_ls_number_restraints      81 
_refine_ls_R_factor_all           0.1259 
_refine_ls_R_factor_gt            0.0706 
_refine_ls_wR_factor_ref          0.2373 
_refine_ls_wR_factor_gt           0.2062 
_refine_ls_goodness_of_fit_ref    0.965 
_refine_ls_restrained_S_all       0.975 
_refine_ls_shift/su_max           0.000 
_refine_ls_shift/su_mean          0.000 
 
loop_ 
 _atom_site_label 
 _atom_site_type_symbol 
 _atom_site_fract_x 
 _atom_site_fract_y 
 _atom_site_fract_z 
 _atom_site_U_iso_or_equiv 
 _atom_site_adp_type 
 _atom_site_occupancy 
 _atom_site_symmetry_multiplicity 
 _atom_site_calc_flag 
 _atom_site_refinement_flags 
 _atom_site_disorder_assembly 
 _atom_site_disorder_group 
Fe1 Fe 0.75631(4) 0.28159(3) 0.70395(4) 0.0453(3) Uani 1 1 d . . . 
Ni1 Ni 0.5000 0.19749(3) 0.7500 0.0392(3) Uani 1 2 d S . . 
S1 S 0.53388(12) 0.08281(6) 0.53839(9) 0.0661(5) Uani 1 1 d . . . 
S2 S 0.49361(12) 0.02404(6) 0.65612(10) 0.0705(5) Uani 1 1 d . . . 
S3 S 0.66187(16) 0.01186(8) 0.50336(13) 0.0999(7) Uani 1 1 d U . . 
S4 S 0.60941(13) -0.05528(6) 0.63091(11) 0.0828(6) Uani 1 1 d U . . 
B1 B 0.8807(4) 0.2081(3) 0.6622(4) 0.0577(18) Uani 1 1 d . . . 
H1A H 0.9207 0.1851 0.6487 0.069 Uiso 1 1 d R . . 
C1 C 0.9875(4) 0.2773(3) 0.6465(4) 0.0703(19) Uani 1 1 d . . . 
H1 H 1.0312 0.2595 0.6340 0.084 Uiso 1 1 calc R . . 
C2 C 0.9862(4) 0.3252(3) 0.6503(3) 0.0659(17) Uani 1 1 d . . . 
H2 H 1.0267 0.3464 0.6404 0.079 Uiso 1 1 calc R . . 
C3 C 0.9098(4) 0.3356(2) 0.6725(3) 0.0591(16) Uani 1 1 d . . . 
H3 H 0.8913 0.3661 0.6808 0.071 Uiso 1 1 calc R . . 
C4 C 0.8848(4) 0.1627(2) 0.7865(4) 0.0691(19) Uani 1 1 d . . . 
H4 H 0.9213 0.1378 0.7814 0.083 Uiso 1 1 calc R . . 
C5 C 0.8443(4) 0.1703(3) 0.8449(4) 0.0720(19) Uani 1 1 d . . . 
H5 H 0.8490 0.1520 0.8868 0.086 Uiso 1 1 calc R . . 
C6 C 0.7959(4) 0.2104(2) 0.8285(3) 0.0579(16) Uani 1 1 d . . . 
H6 H 0.7614 0.2236 0.8580 0.069 Uiso 1 1 calc R . . 
C7 C 0.7710(5) 0.1827(2) 0.5473(3) 0.0644(17) Uani 1 1 d . . . 
H7 H 0.8019 0.1597 0.5279 0.077 Uiso 1 1 calc R . . 
C8 C 0.6908(4) 0.1966(2) 0.5195(3) 0.0688(18) Uani 1 1 d . . . 
H8 H 0.6562 0.1842 0.4787 0.083 Uiso 1 1 calc R . . 
C9 C 0.6709(4) 0.2329(2) 0.5638(3) 0.0573(15) Uani 1 1 d . . . 
H9 H 0.6207 0.2499 0.5571 0.069 Uiso 1 1 calc R . . 
C10 C 0.7725(4) 0.3215(2) 0.7889(3) 0.0579(15) Uani 1 1 d . . . 
C11 C 0.7053(4) 0.3351(2) 0.6484(3) 0.0610(16) Uani 1 1 d . . . 
C12 C 0.6489(4) 0.26426(19) 0.7254(3) 0.0462(13) Uani 1 1 d . . . 
C13 C 0.4456(4) 0.2438(2) 0.6043(3) 0.0578(15) Uani 1 1 d . . . 
H13 H 0.4628 0.2706 0.6321 0.069 Uiso 1 1 calc R . . 
C14 C 0.4110(4) 0.2495(3) 0.5320(4) 0.0712(19) Uani 1 1 d . . . 
H14 H 0.4048 0.2796 0.5114 0.085 Uiso 1 1 calc R . . 
C15 C 0.3858(4) 0.2097(3) 0.4909(4) 0.079(2) Uani 1 1 d . . . 
H15 H 0.3635 0.2124 0.4416 0.095 Uiso 1 1 calc R . . 
C16 C 0.3942(4) 0.1661(2) 0.5237(3) 0.0650(17) Uani 1 1 d . . . 
H16 H 0.3760 0.1390 0.4972 0.078 Uiso 1 1 calc R . . 
C17 C 0.4298(3) 0.1626(2) 0.5960(3) 0.0496(14) Uani 1 1 d . . . 
C18 C 0.3617(3) 0.1423(2) 0.8023(3) 0.0518(14) Uani 1 1 d . . . 
H18 H 0.3731 0.1643 0.8398 0.062 Uiso 1 1 calc R . . 
C19 C 0.2999(4) 0.1094(2) 0.8048(4) 0.0611(16) Uani 1 1 d . . . 
H19 H 0.2695 0.1094 0.8425 0.073 Uiso 1 1 calc R . . 
C20 C 0.2840(4) 0.0764(2) 0.7500(4) 0.0689(19) Uani 1 1 d . . . 
H20 H 0.2432 0.0532 0.7511 0.083 Uiso 1 1 calc R . . 
C21 C 0.3283(4) 0.0773(2) 0.6930(4) 0.0641(17) Uani 1 1 d . . . 
C22 C 0.3913(3) 0.11194(18) 0.6957(3) 0.0471(13) Uani 1 1 d . . . 
C23 C 0.4368(3) 0.1157(2) 0.6339(3) 0.0527(14) Uani 1 1 d . . . 
C24 C 0.4793(4) 0.0793(2) 0.6111(3) 0.0579(15) Uani 1 1 d . . . 
C25 C 0.5882(4) 0.0286(2) 0.5560(4) 0.0652(15) Uani 1 1 d U . . 
C26 C 0.6787(7) 0.0602(4) 0.4561(6) 0.139(3) Uani 1 1 d U . . 
H26A H 0.6332 0.0820 0.4572 0.209 Uiso 1 1 d R . . 
H26B H 0.6783 0.0503 0.4069 0.209 Uiso 1 1 d R . . 
H26C H 0.7311 0.0757 0.4747 0.209 Uiso 1 1 d R . . 
C27 C 0.5701(4) 0.0014(2) 0.6091(4) 0.0698(16) Uani 1 1 d U . . 
C28 C 0.6640(6) -0.0476(3) 0.7226(5) 0.115(3) Uani 1 1 d U . . 
H28A H 0.6918 -0.0173 0.7267 0.173 Uiso 1 1 d R . . 
H28B H 0.7050 -0.0724 0.7352 0.173 Uiso 1 1 d R . . 
H28C H 0.6242 -0.0487 0.7549 0.173 Uiso 1 1 d R . . 
N1 N 0.9155(3) 0.25885(18) 0.6637(3) 0.0583(13) Uani 1 1 d . . . 
N2 N 0.8675(3) 0.29604(17) 0.6799(3) 0.0515(12) Uani 1 1 d . . . 
N3 N 0.8611(3) 0.19827(17) 0.7382(3) 0.0549(12) Uani 1 1 d . . . 
N4 N 0.8058(3) 0.22756(16) 0.7639(2) 0.0513(12) Uani 1 1 d . . . 
N5 N 0.7972(3) 0.20837(17) 0.6082(3) 0.0549(12) Uani 1 1 d . . . 
N6 N 0.7372(3) 0.23944(16) 0.6186(2) 0.0475(11) Uani 1 1 d . . . 
N7 N 0.7789(4) 0.3446(2) 0.8399(3) 0.0803(17) Uani 1 1 d . . . 
N8 N 0.6754(4) 0.3665(2) 0.6171(4) 0.094(2) Uani 1 1 d . . . 
N9 N 0.5880(3) 0.24801(15) 0.7375(2) 0.0467(11) Uani 1 1 d . . . 
N10 N 0.4555(3) 0.20074(15) 0.6361(2) 0.0454(11) Uani 1 1 d . . . 
N11 N 0.4069(3) 0.14436(15) 0.7486(2) 0.0459(11) Uani 1 1 d . . . 
O1 O 0.0000 0.0657(10) 0.7500 0.230(13) Uani 0.50 2 d SPU . . 
H1B H -0.0221 0.0628 0.7054 0.276 Uiso 0.25 1 d PR . . 
H1C H 0.0484 0.0529 0.7561 0.276 Uiso 0.25 1 d PR . . 
O2 O 0.8454(17) 0.0186(10) 0.3525(15) 0.302(13) Uani 0.50 1 d PU . . 
H2A H 0.8215 0.0003 0.3786 0.362 Uiso 0.50 1 d PR . . 
H2B H 0.8118 0.0414 0.3384 0.362 Uiso 0.50 1 d PR . . 
O3 O 0.574(2) 0.4253(10) 0.4885(18) 0.344(15) Uani 0.50 1 d PU . . 
H3A H 0.6056 0.4082 0.5191 0.413 Uiso 0.50 1 d PR . . 
H3B H 0.5243 0.4238 0.4985 0.413 Uiso 0.50 1 d PR . . 
O4 O 0.3396(17) 0.3885(9) 0.5805(16) 0.298(13) Uani 0.50 1 d PU . . 
H4A H 0.3137 0.3984 0.5396 0.357 Uiso 0.50 1 d PR . . 
H4B H 0.3162 0.3918 0.6175 0.357 Uiso 0.50 1 d PR . . 
O5 O 0.844(2) 0.0446(12) 0.9347(18) 0.377(18) Uani 0.50 1 d PU . . 
H5A H 0.8091 0.0312 0.9570 0.452 Uiso 0.50 1 d PR . . 
H5B H 0.8901 0.0304 0.9325 0.452 Uiso 0.50 1 d PR . . 
O6 O 0.6059(19) 0.4371(10) 0.3666(15) 0.317(14) Uani 0.50 1 d PU . . 
H6A H 0.6404 0.4594 0.3808 0.380 Uiso 0.50 1 d PR . . 
H6B H 0.6341 0.4129 0.3584 0.380 Uiso 0.50 1 d PR . . 
O7 O 0.864(3) 0.0298(16) 0.216(3) 0.56(3) Uani 0.50 1 d PU . . 
H7A H 0.8609 0.0458 0.1771 0.668 Uiso 0.50 1 d PR . . 
H7B H 0.9143 0.0313 0.2389 0.668 Uiso 0.50 1 d PR . . 
O8 O 0.481(3) 0.3656(16) 0.534(3) 0.52(3) Uani 0.50 1 d PU . . 
H8A H 0.5062 0.3494 0.5697 0.621 Uiso 0.50 1 d PR . . 
H8B H 0.4321 0.3723 0.5428 0.621 Uiso 0.50 1 d PR . . 
O9 O 0.0000 0.132(2) 0.2500 0.58(5) Uani 0.50 2 d SPU . . 
H9A H -0.0138 0.1373 0.2048 0.694 Uiso 0.25 1 d PR . . 
H9B H 0.0506 0.1237 0.2666 0.694 Uiso 0.25 1 d PR . . 
 
loop_ 
 _atom_site_aniso_label 
 _atom_site_aniso_U_11 
 _atom_site_aniso_U_22 
 _atom_site_aniso_U_33 
 _atom_site_aniso_U_23 
 _atom_site_aniso_U_13 
 _atom_site_aniso_U_12 
Fe1 0.0422(5) 0.0507(5) 0.0427(5) 0.0009(4) 0.0069(3) -0.0081(3) 
Ni1 0.0391(5) 0.0407(5) 0.0379(5) 0.000 0.0070(4) 0.000 
S1 0.0844(12) 0.0590(10) 0.0556(10) -0.0077(8) 0.0142(9) 0.0043(8) 
S2 0.0925(13) 0.0500(10) 0.0710(12) -0.0011(8) 0.0196(10) 0.0019(9) 
S3 0.1146(16) 0.0919(14) 0.1023(16) -0.0156(12) 0.0445(13) 0.0169(12) 
S4 0.1078(15) 0.0518(10) 0.0851(13) -0.0106(9) 0.0071(11) 0.0113(9) 
B1 0.045(4) 0.066(5) 0.063(5) 0.008(4) 0.011(3) -0.006(3) 
C1 0.041(3) 0.103(6) 0.068(4) 0.019(4) 0.014(3) -0.006(4) 
C2 0.051(4) 0.082(5) 0.065(4) 0.010(4) 0.012(3) -0.024(3) 
C3 0.057(4) 0.064(4) 0.055(4) -0.002(3) 0.007(3) -0.015(3) 
C4 0.056(4) 0.058(4) 0.085(5) 0.019(4) -0.010(4) -0.003(3) 
C5 0.079(5) 0.077(5) 0.057(4) 0.015(4) 0.004(4) -0.018(4) 
C6 0.065(4) 0.065(4) 0.042(3) 0.005(3) 0.007(3) -0.014(3) 
C7 0.086(5) 0.063(4) 0.047(4) -0.002(3) 0.019(3) -0.013(4) 
C8 0.081(5) 0.076(5) 0.046(4) -0.007(3) 0.003(3) -0.026(4) 
C9 0.053(3) 0.069(4) 0.048(3) 0.005(3) 0.004(3) -0.013(3) 
C10 0.062(4) 0.057(4) 0.053(4) -0.002(3) 0.006(3) -0.018(3) 
C11 0.060(4) 0.068(4) 0.057(4) 0.008(3) 0.016(3) 0.004(3) 
C12 0.051(3) 0.047(3) 0.040(3) -0.002(3) 0.006(3) -0.003(3) 
C13 0.071(4) 0.052(4) 0.050(4) 0.003(3) 0.008(3) -0.002(3) 
C14 0.085(5) 0.071(5) 0.056(4) 0.019(4) 0.009(4) 0.010(4) 
C15 0.091(5) 0.095(6) 0.048(4) -0.003(4) 0.003(4) 0.013(4) 
C16 0.082(5) 0.063(4) 0.046(4) -0.001(3) 0.000(3) 0.005(3) 
C17 0.053(3) 0.054(4) 0.041(3) -0.002(3) 0.006(3) 0.005(3) 
C18 0.055(3) 0.048(3) 0.053(4) 0.004(3) 0.010(3) 0.003(3) 
C19 0.052(4) 0.058(4) 0.077(5) 0.013(4) 0.022(3) 0.006(3) 
C20 0.049(4) 0.057(4) 0.101(6) 0.012(4) 0.013(4) -0.008(3) 
C21 0.050(4) 0.058(4) 0.082(5) 0.001(3) 0.007(3) -0.005(3) 
C22 0.052(3) 0.042(3) 0.044(3) 0.005(3) 0.001(3) 0.002(3) 
C23 0.053(3) 0.049(3) 0.052(4) -0.006(3) -0.003(3) -0.003(3) 
C24 0.068(4) 0.055(4) 0.048(4) -0.010(3) 0.004(3) -0.008(3) 
C25 0.078(4) 0.052(3) 0.063(4) -0.018(2) 0.008(3) 0.004(3) 
C26 0.153(5) 0.139(5) 0.140(5) 0.010(4) 0.063(4) -0.001(4) 
C27 0.083(5) 0.054(3) 0.071(4) -0.013(3) 0.009(3) -0.004(3) 
C28 0.139(5) 0.097(4) 0.102(4) -0.001(3) 0.002(3) 0.023(4) 
N1 0.040(3) 0.068(3) 0.067(3) 0.009(3) 0.010(2) -0.002(2) 
N2 0.042(3) 0.060(3) 0.051(3) 0.004(2) 0.004(2) -0.014(2) 
N3 0.048(3) 0.059(3) 0.056(3) 0.003(3) 0.005(2) -0.005(2) 
N4 0.048(3) 0.055(3) 0.048(3) 0.003(2) 0.001(2) -0.006(2) 
N5 0.053(3) 0.062(3) 0.050(3) 0.002(2) 0.012(2) -0.006(2) 
N6 0.042(2) 0.058(3) 0.043(3) -0.002(2) 0.009(2) -0.006(2) 
N7 0.106(5) 0.071(4) 0.062(4) -0.011(3) 0.011(3) -0.021(3) 
N8 0.098(5) 0.091(5) 0.097(5) 0.035(4) 0.025(4) 0.027(4) 
N9 0.044(3) 0.049(3) 0.049(3) -0.004(2) 0.014(2) -0.001(2) 
N10 0.048(3) 0.049(3) 0.039(2) 0.002(2) 0.008(2) -0.001(2) 
N11 0.043(2) 0.046(3) 0.048(3) 0.006(2) 0.006(2) 0.003(2) 
O1 0.231(14) 0.224(14) 0.235(14) 0.000 0.041(5) 0.000 
O2 0.300(14) 0.304(14) 0.301(14) -0.005(5) 0.051(6) -0.004(5) 
O3 0.347(16) 0.342(16) 0.346(16) 0.004(5) 0.068(6) 0.007(5) 
O4 0.292(13) 0.301(13) 0.302(13) 0.008(5) 0.061(5) -0.006(5) 
O5 0.376(19) 0.375(19) 0.378(19) 0.005(5) 0.066(6) -0.001(5) 
O6 0.322(15) 0.314(15) 0.317(15) 0.002(5) 0.063(6) 0.004(5) 
O7 0.56(3) 0.56(3) 0.56(3) -0.001(5) 0.101(8) -0.001(5) 
O8 0.52(3) 0.52(3) 0.52(3) -0.002(5) 0.090(7) -0.005(5) 
O9 0.58(5) 0.58(5) 0.58(5) 0.000 0.105(10) 0.000 
 
_geom_special_details 
; 
 All esds (except the esd in the dihedral angle between two l.s. planes) 
 are estimated using the full covariance matrix.  The cell esds are taken 
 into account individually in the estimation of esds in distances, angles 
 and torsion angles; correlations between esds in cell parameters are only 
 used when they are defined by crystal symmetry.  An approximate (isotropic) 
 treatment of cell esds is used for estimating esds involving l.s. planes. 
; 
 
loop_ 
 _geom_bond_atom_site_label_1 
 _geom_bond_atom_site_label_2 
 _geom_bond_distance 
 _geom_bond_site_symmetry_2 
 _geom_bond_publ_flag 
Fe1 C12 1.914(6) . ? 
Fe1 C10 1.925(7) . ? 
Fe1 C11 1.929(7) . ? 
Fe1 N6 1.968(4) . ? 
Fe1 N2 1.972(4) . ? 
Fe1 N4 1.972(5) . ? 
Ni1 N9 2.054(5) . ? 
Ni1 N9 2.054(5) 2_656 ? 
Ni1 N11 2.118(4) . ? 
Ni1 N11 2.118(4) 2_656 ? 
Ni1 N10 2.125(4) . ? 
Ni1 N10 2.125(4) 2_656 ? 
S1 C24 1.752(6) . ? 
S1 C25 1.761(6) . ? 
S2 C27 1.760(7) . ? 
S2 C24 1.764(6) . ? 
S3 C26 1.673(10) . ? 
S3 C25 1.740(7) . ? 
S4 C27 1.740(7) . ? 
S4 C28 1.795(9) . ? 
B1 N1 1.532(8) . ? 
B1 N5 1.533(8) . ? 
B1 N3 1.538(8) . ? 
B1 H1A 0.9800 . ? 
C1 C2 1.348(9) . ? 
C1 N1 1.365(7) . ? 
C1 H1 0.9300 . ? 
C2 C3 1.403(8) . ? 
C2 H2 0.9300 . ? 
C3 N2 1.327(7) . ? 
C3 H3 0.9300 . ? 
C4 N3 1.358(7) . ? 
C4 C5 1.388(9) . ? 
C4 H4 0.9300 . ? 
C5 C6 1.376(9) . ? 
C5 H5 0.9300 . ? 
C6 N4 1.336(7) . ? 
C6 H6 0.9300 . ? 
C7 N5 1.351(7) . ? 
C7 C8 1.363(9) . ? 
C7 H7 0.9300 . ? 
C8 C9 1.391(9) . ? 
C8 H8 0.9300 . ? 
C9 N6 1.355(7) . ? 
C9 H9 0.9300 . ? 
C10 N7 1.144(8) . ? 
C11 N8 1.122(8) . ? 
C12 N9 1.144(6) . ? 
C13 N10 1.347(7) . ? 
C13 C14 1.375(8) . ? 
C13 H13 0.9300 . ? 
C14 C15 1.380(9) . ? 
C14 H14 0.9300 . ? 
C15 C16 1.366(9) . ? 
C15 H15 0.9300 . ? 
C16 C17 1.375(8) . ? 
C16 H16 0.9300 . ? 
C17 N10 1.333(7) . ? 
C17 C23 1.494(8) . ? 
C18 N11 1.346(7) . ? 
C18 C19 1.368(8) . ? 
C18 H18 0.9300 . ? 
C19 C20 1.374(9) . ? 
C19 H19 0.9300 . ? 
C20 C21 1.387(9) . ? 
C20 H20 0.9300 . ? 
C21 C22 1.404(8) . ? 
C22 N11 1.337(7) . ? 
C22 C23 1.480(8) . ? 
C23 C24 1.345(8) . ? 
C25 C27 1.328(9) . ? 
C26 H26A 0.9600 . ? 
C26 H26B 0.9600 . ? 
C26 H26C 0.9600 . ? 
C28 H28A 0.9600 . ? 
C28 H28B 0.9600 . ? 
C28 H28C 0.9600 . ? 
N1 N2 1.369(7) . ? 
N3 N4 1.365(6) . ? 
N5 N6 1.346(6) . ? 
O1 H1B 0.8499 . ? 
O1 H1C 0.8500 . ? 
O2 H2A 0.8499 . ? 
O2 H2B 0.8500 . ? 
O3 H3A 0.8499 . ? 
O3 H3B 0.8499 . ? 
O4 H4A 0.8501 . ? 
O4 H4B 0.8500 . ? 
O5 H5A 0.8500 . ? 
O5 H5B 0.8501 . ? 
O6 H6A 0.8500 . ? 
O6 H6B 0.8498 . ? 
O7 H7A 0.8501 . ? 
O7 H7B 0.8501 . ? 
O8 H8A 0.8499 . ? 
O8 H8B 0.8501 . ? 
O9 H9A 0.8500 . ? 
O9 H9B 0.8500 . ? 
 
loop_ 
 _geom_angle_atom_site_label_1 
 _geom_angle_atom_site_label_2 
 _geom_angle_atom_site_label_3 
 _geom_angle 
 _geom_angle_site_symmetry_1 
 _geom_angle_site_symmetry_3 
 _geom_angle_publ_flag 
C12 Fe1 C10 88.3(2) . . ? 
C12 Fe1 C11 89.8(2) . . ? 
C10 Fe1 C11 88.3(3) . . ? 
C12 Fe1 N6 90.0(2) . . ? 
C10 Fe1 N6 178.1(2) . . ? 
C11 Fe1 N6 92.5(2) . . ? 
C12 Fe1 N2 177.0(2) . . ? 
C10 Fe1 N2 94.2(2) . . ? 
C11 Fe1 N2 92.0(2) . . ? 
N6 Fe1 N2 87.50(19) . . ? 
C12 Fe1 N4 88.5(2) . . ? 
C10 Fe1 N4 89.9(2) . . ? 
C11 Fe1 N4 177.6(2) . . ? 
N6 Fe1 N4 89.16(19) . . ? 
N2 Fe1 N4 89.8(2) . . ? 
N9 Ni1 N9 92.4(2) . 2_656 ? 
N9 Ni1 N11 172.79(17) . . ? 
N9 Ni1 N11 89.17(17) 2_656 . ? 
N9 Ni1 N11 89.17(17) . 2_656 ? 
N9 Ni1 N11 172.79(17) 2_656 2_656 ? 
N11 Ni1 N11 90.2(2) . 2_656 ? 
N9 Ni1 N10 88.40(17) . . ? 
N9 Ni1 N10 88.19(17) 2_656 . ? 
N11 Ni1 N10 84.61(17) . . ? 
N11 Ni1 N10 98.89(17) 2_656 . ? 
N9 Ni1 N10 88.19(17) . 2_656 ? 
N9 Ni1 N10 88.40(17) 2_656 2_656 ? 
N11 Ni1 N10 98.89(17) . 2_656 ? 
N11 Ni1 N10 84.61(17) 2_656 2_656 ? 
N10 Ni1 N10 175.1(2) . 2_656 ? 
C24 S1 C25 96.3(3) . . ? 
C27 S2 C24 97.1(3) . . ? 
C26 S3 C25 105.7(4) . . ? 
C27 S4 C28 102.1(4) . . ? 
N1 B1 N5 106.5(5) . . ? 
N1 B1 N3 106.7(5) . . ? 
N5 B1 N3 107.9(5) . . ? 
N1 B1 H1A 111.5 . . ? 
N5 B1 H1A 112.0 . . ? 
N3 B1 H1A 112.0 . . ? 
C2 C1 N1 110.3(6) . . ? 
C2 C1 H1 124.9 . . ? 
N1 C1 H1 124.9 . . ? 
C1 C2 C3 104.4(6) . . ? 
C1 C2 H2 127.8 . . ? 
C3 C2 H2 127.8 . . ? 
N2 C3 C2 110.6(6) . . ? 
N2 C3 H3 124.7 . . ? 
C2 C3 H3 124.7 . . ? 
N3 C4 C5 107.0(6) . . ? 
N3 C4 H4 126.5 . . ? 
C5 C4 H4 126.5 . . ? 
C6 C5 C4 106.3(6) . . ? 
C6 C5 H5 126.9 . . ? 
C4 C5 H5 126.9 . . ? 
N4 C6 C5 110.1(6) . . ? 
N4 C6 H6 125.0 . . ? 
C5 C6 H6 125.0 . . ? 
N5 C7 C8 107.6(6) . . ? 
N5 C7 H7 126.2 . . ? 
C8 C7 H7 126.2 . . ? 
C7 C8 C9 106.8(6) . . ? 
C7 C8 H8 126.6 . . ? 
C9 C8 H8 126.6 . . ? 
N6 C9 C8 108.3(6) . . ? 
N6 C9 H9 125.8 . . ? 
C8 C9 H9 125.8 . . ? 
N7 C10 Fe1 177.2(6) . . ? 
N8 C11 Fe1 179.0(7) . . ? 
N9 C12 Fe1 171.2(5) . . ? 
N10 C13 C14 122.3(6) . . ? 
N10 C13 H13 118.8 . . ? 
C14 C13 H13 118.8 . . ? 
C13 C14 C15 118.7(6) . . ? 
C13 C14 H14 120.6 . . ? 
C15 C14 H14 120.6 . . ? 
C16 C15 C14 118.8(6) . . ? 
C16 C15 H15 120.6 . . ? 
C14 C15 H15 120.6 . . ? 
C15 C16 C17 119.8(6) . . ? 
C15 C16 H16 120.1 . . ? 
C17 C16 H16 120.1 . . ? 
N10 C17 C16 121.9(5) . . ? 
N10 C17 C23 117.1(5) . . ? 
C16 C17 C23 120.9(5) . . ? 
N11 C18 C19 123.5(6) . . ? 
N11 C18 H18 118.2 . . ? 
C19 C18 H18 118.2 . . ? 
C18 C19 C20 118.2(6) . . ? 
C18 C19 H19 120.9 . . ? 
C20 C19 H19 120.9 . . ? 
C19 C20 C21 120.5(6) . . ? 
C19 C20 H20 119.8 . . ? 
C21 C20 H20 119.8 . . ? 
C20 C21 C22 117.2(6) . . ? 
N11 C22 C21 122.7(5) . . ? 
N11 C22 C23 118.4(5) . . ? 
C21 C22 C23 118.7(5) . . ? 
C24 C23 C22 123.2(5) . . ? 
C24 C23 C17 121.5(6) . . ? 
C22 C23 C17 115.3(5) . . ? 
C23 C24 S1 124.1(5) . . ? 
C23 C24 S2 123.4(5) . . ? 
S1 C24 S2 112.3(3) . . ? 
C27 C25 S3 122.1(5) . . ? 
C27 C25 S1 118.0(5) . . ? 
S3 C25 S1 119.9(4) . . ? 
S3 C26 H26A 108.0 . . ? 
S3 C26 H26B 107.3 . . ? 
H26A C26 H26B 109.5 . . ? 
S3 C26 H26C 113.1 . . ? 
H26A C26 H26C 109.5 . . ? 
H26B C26 H26C 109.5 . . ? 
C25 C27 S4 125.7(6) . . ? 
C25 C27 S2 115.8(5) . . ? 
S4 C27 S2 118.3(4) . . ? 
S4 C28 H28A 109.0 . . ? 
S4 C28 H28B 110.3 . . ? 
H28A C28 H28B 109.5 . . ? 
S4 C28 H28C 109.1 . . ? 
H28A C28 H28C 109.5 . . ? 
H28B C28 H28C 109.5 . . ? 
C1 N1 N2 107.5(5) . . ? 
C1 N1 B1 132.5(6) . . ? 
N2 N1 B1 119.8(5) . . ? 
C3 N2 N1 107.3(5) . . ? 
C3 N2 Fe1 134.8(4) . . ? 
N1 N2 Fe1 117.9(3) . . ? 
C4 N3 N4 109.6(5) . . ? 
C4 N3 B1 131.9(6) . . ? 
N4 N3 B1 118.3(5) . . ? 
C6 N4 N3 107.0(5) . . ? 
C6 N4 Fe1 133.7(4) . . ? 
N3 N4 Fe1 119.3(4) . . ? 
N6 N5 C7 110.1(5) . . ? 
N6 N5 B1 118.6(5) . . ? 
C7 N5 B1 131.2(6) . . ? 
N5 N6 C9 107.2(5) . . ? 
N5 N6 Fe1 119.8(3) . . ? 
C9 N6 Fe1 133.0(4) . . ? 
C12 N9 Ni1 159.6(4) . . ? 
C17 N10 C13 118.4(5) . . ? 
C17 N10 Ni1 123.0(4) . . ? 
C13 N10 Ni1 118.3(4) . . ? 
C22 N11 C18 117.9(5) . . ? 
C22 N11 Ni1 122.0(4) . . ? 
C18 N11 Ni1 120.1(4) . . ? 
H1B O1 H1C 107.7 . . ? 
H2A O2 H2B 107.7 . . ? 
H3A O3 H3B 107.7 . . ? 
H4A O4 H4B 118.5 . . ? 
H5A O5 H5B 118.7 . . ? 
H6A O6 H6B 107.7 . . ? 
H7A O7 H7B 107.7 . . ? 
H8A O8 H8B 107.7 . . ? 
H9A O9 H9B 118.4 . . ? 
 
_diffrn_measured_fraction_theta_max    0.992 
_diffrn_reflns_theta_full              26.00 
_diffrn_measured_fraction_theta_full   0.992 
_refine_diff_density_max    0.581 
_refine_diff_density_min   -0.472 
_refine_diff_density_rms    0.105 

#===END
 
data_4 
 
_audit_creation_method            SHELXL-97 
_chemical_name_systematic 
; 
 ? 
; 
_chemical_name_common             ? 
_chemical_melting_point           ? 
_chemical_formula_moiety          
 'C60 H48 B2 Co Fe2 N22 O8 S4, H0.80 O0.40,  4.6(H2 O)'
_chemical_formula_sum 
 'C60 H58 B2 Co Fe2 N22 O13 S4' 
_chemical_formula_weight          1615.77 
 
loop_ 
 _atom_type_symbol 
 _atom_type_description 
 _atom_type_scat_dispersion_real 
 _atom_type_scat_dispersion_imag 
 _atom_type_scat_source 
 'C'  'C'   0.0033   0.0016 
 'International Tables Vol C Tables 4.2.6.8 and 6.1.1.4' 
 'Co'  'Co'   0.3494   0.9721 
 'International Tables Vol C Tables 4.2.6.8 and 6.1.1.4' 
 'Fe'  'Fe'   0.3463   0.8444 
 'International Tables Vol C Tables 4.2.6.8 and 6.1.1.4' 
 'N'  'N'   0.0061   0.0033 
 'International Tables Vol C Tables 4.2.6.8 and 6.1.1.4' 
 'O'  'O'   0.0106   0.0060 
 'International Tables Vol C Tables 4.2.6.8 and 6.1.1.4' 
 'S'  'S'   0.1246   0.1234 
 'International Tables Vol C Tables 4.2.6.8 and 6.1.1.4' 
 'B'  'B'   0.0013   0.0007 
 'International Tables Vol C Tables 4.2.6.8 and 6.1.1.4' 
 'H'  'H'   0.0000   0.0000 
 'International Tables Vol C Tables 4.2.6.8 and 6.1.1.4' 
 
_symmetry_cell_setting           'Monoclinic'
_symmetry_space_group_name_H-M   'P2(1)/c'
_symmetry_space_group_name_Hall  '-P 2ybc'
 
loop_ 
 _symmetry_equiv_pos_as_xyz 
 'x, y, z' 
 '-x, y+1/2, -z+1/2' 
 '-x, -y, -z' 
 'x, -y-1/2, z-1/2' 
 
_cell_length_a                    16.1743(17) 
_cell_length_b                    30.125(3) 
_cell_length_c                    22.2805(18) 
_cell_angle_alpha                 90.00 
_cell_angle_beta                  125.033(5) 
_cell_angle_gamma                 90.00 
_cell_volume                      8889.3(15) 
_cell_formula_units_Z             4 
_cell_measurement_temperature     291(2) 
_cell_measurement_reflns_used     2604
_cell_measurement_theta_min       2.33 
_cell_measurement_theta_max       18.27 
 
_exptl_crystal_description        plate
_exptl_crystal_colour             Red  
_exptl_crystal_size_max           0.28 
_exptl_crystal_size_mid           0.24 
_exptl_crystal_size_min           0.22 
_exptl_crystal_density_meas       ? 
_exptl_crystal_density_diffrn     1.207 
_exptl_crystal_density_method     'not measured' 
_exptl_crystal_F_000              3316 
_exptl_absorpt_coefficient_mu     0.662 
_exptl_absorpt_correction_type    'multi-scan' 
_exptl_absorpt_correction_T_min   0.8363 
_exptl_absorpt_correction_T_max   0.8680 
_exptl_absorpt_process_details    'SADABS; Bruker, 2000'
 
_exptl_special_details 
; 
 ? 
; 
 
_diffrn_ambient_temperature       291(2) 
_diffrn_radiation_wavelength      0.71073 
_diffrn_radiation_type            MoK\a 
_diffrn_radiation_source          'fine-focus sealed tube' 
_diffrn_radiation_monochromator   graphite 
_diffrn_measurement_device_type   ? 
_diffrn_measurement_method        ? 
_diffrn_detector_area_resol_mean  ? 
_diffrn_standards_number          ? 
_diffrn_standards_interval_count  ? 
_diffrn_standards_interval_time   ? 
_diffrn_standards_decay_%         ? 
_diffrn_reflns_number             47659 
_diffrn_reflns_av_R_equivalents   0.0354 
_diffrn_reflns_av_sigmaI/netI     0.0477 
_diffrn_reflns_limit_h_min        -19 
_diffrn_reflns_limit_h_max        19 
_diffrn_reflns_limit_k_min        -36 
_diffrn_reflns_limit_k_max        37 
_diffrn_reflns_limit_l_min        -27 
_diffrn_reflns_limit_l_max        25 
_diffrn_reflns_theta_min          1.75 
_diffrn_reflns_theta_max          26.00 
_reflns_number_total              17387 
_reflns_number_gt                 12359 
_reflns_threshold_expression      >2sigma(I) 
 
_computing_data_collection        ? 
_computing_cell_refinement        ? 
_computing_data_reduction         ? 
_computing_structure_solution     'SHELXS-97 (Sheldrick, 1990)' 
_computing_structure_refinement   'SHELXL-97 (Sheldrick, 1997)' 
_computing_molecular_graphics     ? 
_computing_publication_material   ? 
 
_refine_special_details 
; 
 Refinement of F^2^ against ALL reflections.  The weighted R-factor wR and 
 goodness of fit S are based on F^2^, conventional R-factors R are based 
 on F, with F set to zero for negative F^2^. The threshold expression of 
 F^2^ > 2sigma(F^2^) is used only for calculating R-factors(gt) etc. and is 
 not relevant to the choice of reflections for refinement.  R-factors based 
 on F^2^ are statistically about twice as large as those based on F, and R- 
 factors based on ALL data will be even larger. 
; 
 
_refine_ls_structure_factor_coef  Fsqd  
_refine_ls_matrix_type            fullcycle 
_refine_ls_weighting_scheme       calc  
_refine_ls_weighting_details 
 'calc w=1/[\s^2^(Fo^2^)+(0.04P)^2^+1.22P] where P=(Fo^2^+2Fc^2^)/3' 
_atom_sites_solution_primary      direct 
_atom_sites_solution_secondary    difmap 
_atom_sites_solution_hydrogens    geom 
_refine_ls_hydrogen_treatment     constr
_refine_ls_extinction_method      none 
_refine_ls_extinction_coef        ? 
_refine_ls_number_reflns          17387 
_refine_ls_number_parameters      1019 
_refine_ls_number_restraints      0 
_refine_ls_R_factor_all           0.0671 
_refine_ls_R_factor_gt            0.0440 
_refine_ls_wR_factor_ref          0.0929 
_refine_ls_wR_factor_gt           0.0884 
_refine_ls_goodness_of_fit_ref    1.030 
_refine_ls_restrained_S_all       1.030 
_refine_ls_shift/su_max           0.000 
_refine_ls_shift/su_mean          0.000 
 
loop_ 
 _atom_site_label 
 _atom_site_type_symbol 
 _atom_site_fract_x 
 _atom_site_fract_y 
 _atom_site_fract_z 
 _atom_site_U_iso_or_equiv 
 _atom_site_adp_type 
 _atom_site_occupancy 
 _atom_site_symmetry_multiplicity 
 _atom_site_calc_flag 
 _atom_site_refinement_flags 
 _atom_site_disorder_assembly 
 _atom_site_disorder_group 
B1 B -0.2635(2) 0.28326(9) 0.12758(16) 0.0484(7) Uani 1 1 d . . . 
H1A H -0.3174 0.3042 0.1155 0.058 Uiso 1 1 calc R . . 
B2 B 0.6827(2) 0.29260(9) 0.30757(15) 0.0488(7) Uani 1 1 d . . . 
H2A H 0.7350 0.3147 0.3210 0.059 Uiso 1 1 calc R . . 
C1 C -0.26975(19) 0.31274(8) 0.01323(13) 0.0500(6) Uani 1 1 d . . . 
H1 H -0.3176 0.3352 -0.0035 0.060 Uiso 1 1 calc R . . 
C2 C -0.22046(19) 0.30070(8) -0.01757(14) 0.0523(6) Uani 1 1 d . . . 
H2 H -0.2285 0.3133 -0.0587 0.063 Uiso 1 1 calc R . . 
C3 C -0.15637(18) 0.26623(8) 0.02398(12) 0.0472(6) Uani 1 1 d . . . 
H3 H -0.1140 0.2513 0.0152 0.057 Uiso 1 1 calc R . . 
C4 C -0.13848(19) 0.32802(7) 0.25163(13) 0.0471(6) Uani 1 1 d . . . 
H4 H -0.1807 0.3504 0.2479 0.057 Uiso 1 1 calc R . . 
C5 C -0.04439(18) 0.32353(7) 0.30342(13) 0.0463(6) Uani 1 1 d . . . 
H5 H -0.0076 0.3425 0.3433 0.056 Uiso 1 1 calc R . . 
C6 C -0.00455(19) 0.28537(8) 0.29098(13) 0.0480(6) Uani 1 1 d . . . 
H6 H 0.0614 0.2749 0.3205 0.058 Uiso 1 1 calc R . . 
C7 C -0.38089(18) 0.22033(8) 0.11658(14) 0.0491(6) Uani 1 1 d . . . 
H7 H -0.4356 0.2364 0.1082 0.059 Uiso 1 1 calc R . . 
C8 C -0.37232(18) 0.17338(8) 0.11888(13) 0.0487(6) Uani 1 1 d . . . 
H8 H -0.4210 0.1526 0.1094 0.058 Uiso 1 1 calc R . . 
C9 C -0.27368(18) 0.16507(8) 0.13879(13) 0.0478(6) Uani 1 1 d . . . 
H9 H -0.2447 0.1371 0.1473 0.057 Uiso 1 1 calc R . . 
C10 C -0.09956(18) 0.17060(8) 0.10661(14) 0.0492(6) Uani 1 1 d . . . 
C11 C -0.01897(19) 0.18088(8) 0.25065(13) 0.0473(6) Uani 1 1 d . . . 
C12 C 0.03156(17) 0.23498(7) 0.18422(12) 0.0397(5) Uani 1 1 d . . . 
C13 C 0.80741(18) 0.23071(8) 0.32172(13) 0.0478(6) Uani 1 1 d . . . 
H13 H 0.8624 0.2482 0.3338 0.057 Uiso 1 1 calc R . . 
C14 C 0.80069(19) 0.18619(8) 0.31626(14) 0.0507(6) Uani 1 1 d . . . 
H14 H 0.8519 0.1672 0.3251 0.061 Uiso 1 1 calc R . . 
C15 C 0.70346(18) 0.17283(8) 0.29490(12) 0.0474(6) Uani 1 1 d . . . 
H15 H 0.6784 0.1440 0.2865 0.057 Uiso 1 1 calc R . . 
C16 C 0.67758(19) 0.31547(8) 0.41878(13) 0.0482(6) Uani 1 1 d . . . 
H16 H 0.7262 0.3378 0.4385 0.058 Uiso 1 1 calc R . . 
C17 C 0.62507(18) 0.30337(8) 0.44606(12) 0.0489(6) Uani 1 1 d . . . 
H17 H 0.6289 0.3159 0.4857 0.059 Uiso 1 1 calc R . . 
C18 C 0.56394(17) 0.26818(7) 0.40267(12) 0.0434(5) Uani 1 1 d . . . 
H18 H 0.5204 0.2519 0.4087 0.052 Uiso 1 1 calc R . . 
C19 C 0.5604(2) 0.33555(8) 0.18279(14) 0.0543(7) Uani 1 1 d . . . 
H19 H 0.6021 0.3587 0.1881 0.065 Uiso 1 1 calc R . . 
C20 C 0.46103(19) 0.32956(8) 0.12495(14) 0.0540(6) Uani 1 1 d . . . 
H20 H 0.4228 0.3481 0.0846 0.065 Uiso 1 1 calc R . . 
C21 C 0.42930(18) 0.29069(7) 0.13837(12) 0.0441(5) Uani 1 1 d . . . 
H21 H 0.3657 0.2780 0.1076 0.053 Uiso 1 1 calc R . . 
C22 C 0.45049(16) 0.18448(7) 0.17817(11) 0.0389(5) Uani 1 1 d . . . 
C23 C 0.52303(16) 0.17190(6) 0.31941(11) 0.0368(5) Uani 1 1 d . . . 
C24 C 0.39040(17) 0.23629(7) 0.24200(13) 0.0431(5) Uani 1 1 d . . . 
C25 C 0.12985(17) 0.25199(8) 0.06714(13) 0.0476(6) Uani 1 1 d . . . 
H25 H 0.1379 0.2269 0.0944 0.057 Uiso 1 1 calc R . . 
C26 C 0.09858(19) 0.24822(8) -0.00828(13) 0.0524(6) Uani 1 1 d . . . 
H26 H 0.0843 0.2205 -0.0305 0.063 Uiso 1 1 calc R . . 
C27 C 0.0906(2) 0.28385(8) -0.04498(14) 0.0540(6) Uani 1 1 d . . . 
H27 H 0.0694 0.2812 -0.0934 0.065 Uiso 1 1 calc R . . 
C28 C 0.11278(19) 0.32473(8) -0.01315(13) 0.0493(6) Uani 1 1 d . . . 
H28 H 0.1097 0.3497 -0.0389 0.059 Uiso 1 1 calc R . . 
C29 C 0.14002(18) 0.32883(8) 0.05806(12) 0.0445(5) Uani 1 1 d . . . 
C30 C 0.39970(18) 0.35316(8) 0.27492(13) 0.0475(6) Uani 1 1 d . . . 
H30 H 0.4252 0.3317 0.3115 0.057 Uiso 1 1 calc R . . 
C31 C 0.46221(18) 0.38760(7) 0.28342(13) 0.0485(6) Uani 1 1 d . . . 
H31 H 0.5281 0.3895 0.3251 0.058 Uiso 1 1 calc R . . 
C32 C 0.42416(19) 0.41941(8) 0.22810(14) 0.0504(6) Uani 1 1 d . . . 
H32 H 0.4633 0.4435 0.2324 0.061 Uiso 1 1 calc R . . 
C33 C 0.32366(19) 0.41395(8) 0.16491(14) 0.0510(6) Uani 1 1 d . . . 
H33 H 0.2968 0.4337 0.1259 0.061 Uiso 1 1 calc R . . 
C34 C 0.26695(19) 0.37927(7) 0.16225(13) 0.0494(6) Uani 1 1 d . . . 
C35 C 0.16162(18) 0.37251(8) 0.09459(13) 0.0510(6) Uani 1 1 d . . . 
C36 C 0.09051(18) 0.40508(7) 0.06782(13) 0.0463(6) Uani 1 1 d . . . 
C37 C -0.08347(19) 0.44399(8) 0.00359(14) 0.0485(6) Uani 1 1 d . . . 
C38 C -0.01236(19) 0.47056(7) 0.06225(13) 0.0457(6) Uani 1 1 d . . . 
C39 C -0.0355(2) 0.51155(8) 0.08792(14) 0.0521(6) Uani 1 1 d . . . 
C40 C 0.0208(2) 0.56336(8) 0.17730(14) 0.0592(7) Uani 1 1 d . . . 
H40A H 0.0056 0.5860 0.1421 0.089 Uiso 1 1 calc R . . 
H40B H 0.0816 0.5710 0.2237 0.089 Uiso 1 1 calc R . . 
H40C H -0.0339 0.5609 0.1826 0.089 Uiso 1 1 calc R . . 
C41 C -0.19420(19) 0.44696(7) -0.05068(13) 0.0464(6) Uani 1 1 d . . . 
C42 C -0.35418(19) 0.45510(8) -0.07691(14) 0.0563(7) Uani 1 1 d . . . 
H42A H -0.3703 0.4831 -0.1019 0.084 Uiso 1 1 calc R . . 
H42B H -0.3912 0.4520 -0.0556 0.084 Uiso 1 1 calc R . . 
H42C H -0.3721 0.4314 -0.1112 0.084 Uiso 1 1 calc R . . 
C43 C 0.01426(18) 0.34895(7) 0.15380(12) 0.0457(5) Uani 1 1 d . . . 
H43 H -0.0086 0.3287 0.1158 0.055 Uiso 1 1 calc R . . 
C44 C -0.0541(2) 0.37962(8) 0.14744(14) 0.0534(6) Uani 1 1 d . . . 
H44 H -0.1213 0.3799 0.1072 0.064 Uiso 1 1 calc R . . 
C45 C -0.01772(19) 0.40930(7) 0.20327(14) 0.0486(6) Uani 1 1 d . . . 
H45 H -0.0610 0.4309 0.2004 0.058 Uiso 1 1 calc R . . 
C46 C 0.0787(2) 0.40854(7) 0.26253(14) 0.0500(6) Uani 1 1 d . . . 
H46 H 0.1013 0.4290 0.3001 0.060 Uiso 1 1 calc R . . 
C47 C 0.14425(18) 0.37661(7) 0.26677(12) 0.0441(5) Uani 1 1 d . . . 
C48 C 0.29890(18) 0.25316(8) 0.36058(13) 0.0485(6) Uani 1 1 d . . . 
H48 H 0.2962 0.2290 0.3334 0.058 Uiso 1 1 calc R . . 
C49 C 0.33074(19) 0.24565(8) 0.43220(13) 0.0499(6) Uani 1 1 d . . . 
H49 H 0.3450 0.2172 0.4519 0.060 Uiso 1 1 calc R . . 
C50 C 0.34051(18) 0.28281(8) 0.47381(14) 0.0515(6) Uani 1 1 d . . . 
H50 H 0.3674 0.2797 0.5233 0.062 Uiso 1 1 calc R . . 
C51 C 0.30998(19) 0.32433(8) 0.44085(14) 0.0522(6) Uani 1 1 d . . . 
H51 H 0.3091 0.3487 0.4660 0.063 Uiso 1 1 calc R . . 
C52 C 0.2806(2) 0.32821(8) 0.36841(14) 0.0521(6) Uani 1 1 d . . . 
C53 C 0.24990(18) 0.37172(7) 0.33232(13) 0.0461(6) Uani 1 1 d . . . 
C54 C 0.31216(18) 0.40642(8) 0.35820(13) 0.0503(6) Uani 1 1 d . . . 
C55 C 0.40439(19) 0.47917(7) 0.36697(14) 0.0472(6) Uani 1 1 d . . . 
C56 C 0.47829(18) 0.45389(8) 0.42274(13) 0.0458(6) Uani 1 1 d . . . 
C57 C 0.41564(18) 0.52410(8) 0.34531(14) 0.0544(7) Uani 1 1 d . . . 
C58 C 0.4893(2) 0.56644(7) 0.29419(14) 0.0540(6) Uani 1 1 d . . . 
H58A H 0.4350 0.5731 0.2445 0.081 Uiso 1 1 calc R . . 
H58B H 0.5508 0.5630 0.2975 0.081 Uiso 1 1 calc R . . 
H58C H 0.4968 0.5902 0.3257 0.081 Uiso 1 1 calc R . . 
C59 C 0.58626(19) 0.46776(7) 0.47494(13) 0.0473(6) Uani 1 1 d . . . 
C60 C 0.74941(18) 0.44658(8) 0.55923(14) 0.0504(6) Uani 1 1 d . . . 
H60A H 0.7726 0.4619 0.5337 0.076 Uiso 1 1 calc R . . 
H60B H 0.7878 0.4198 0.5804 0.076 Uiso 1 1 calc R . . 
H60C H 0.7580 0.4653 0.5974 0.076 Uiso 1 1 calc R . . 
Co1 Co 0.20885(2) 0.296673(9) 0.212568(15) 0.03573(7) Uani 1 1 d . . . 
Fe1 Fe -0.09445(2) 0.218033(10) 0.165293(17) 0.04062(8) Uani 1 1 d . . . 
Fe2 Fe 0.51775(2) 0.221993(9) 0.263896(16) 0.03636(8) Uani 1 1 d . . . 
N1 N -0.23777(15) 0.28691(7) 0.07141(11) 0.0496(5) Uani 1 1 d . . . 
N2 N -0.16540(15) 0.25774(6) 0.07987(11) 0.0466(5) Uani 1 1 d . . . 
N3 N -0.16518(15) 0.29477(6) 0.20388(11) 0.0471(5) Uani 1 1 d . . . 
N4 N -0.08300(14) 0.26706(6) 0.22654(10) 0.0435(4) Uani 1 1 d . . . 
N5 N -0.29491(14) 0.23751(6) 0.12874(11) 0.0458(5) Uani 1 1 d . . . 
N6 N -0.22739(15) 0.20356(6) 0.14376(11) 0.0476(5) Uani 1 1 d . . . 
N7 N -0.10195(16) 0.14247(7) 0.07103(11) 0.0521(5) Uani 1 1 d . . . 
N8 N 0.02586(15) 0.15936(6) 0.30047(11) 0.0489(5) Uani 1 1 d . . . 
N9 N 0.10532(14) 0.24860(6) 0.19587(10) 0.0437(4) Uani 1 1 d . . . 
N10 N 0.71818(15) 0.24473(6) 0.30612(10) 0.0462(5) Uani 1 1 d . . . 
N11 N 0.65511(14) 0.21024(6) 0.28936(10) 0.0454(5) Uani 1 1 d . . . 
N12 N 0.65207(15) 0.29232(6) 0.36203(10) 0.0469(5) Uani 1 1 d . . . 
N13 N 0.58040(14) 0.26219(6) 0.34941(10) 0.0435(4) Uani 1 1 d . . . 
N14 N 0.58701(13) 0.30112(5) 0.23143(9) 0.0374(4) Uani 1 1 d . . . 
N15 N 0.50592(13) 0.27387(5) 0.20378(10) 0.0377(4) Uani 1 1 d . . . 
N16 N 0.40480(15) 0.16351(6) 0.12623(11) 0.0494(5) Uani 1 1 d . . . 
N17 N 0.52325(15) 0.14371(6) 0.35252(10) 0.0435(4) Uani 1 1 d . . . 
N18 N 0.31434(14) 0.24992(6) 0.22931(10) 0.0443(4) Uani 1 1 d . . . 
N19 N 0.14717(15) 0.29397(6) 0.09700(10) 0.0448(5) Uani 1 1 d . . . 
N20 N 0.30349(15) 0.34928(6) 0.21593(10) 0.0450(5) Uani 1 1 d . . . 
N21 N 0.11130(15) 0.34651(6) 0.21106(11) 0.0453(5) Uani 1 1 d . . . 
N22 N 0.27170(15) 0.29310(6) 0.32790(10) 0.0455(5) Uani 1 1 d . . . 
O1 O 0.03442(13) 0.52190(5) 0.15282(9) 0.0519(4) Uani 1 1 d . . . 
O2 O -0.11508(13) 0.53298(5) 0.04593(9) 0.0522(4) Uani 1 1 d . . . 
O3 O -0.23687(12) 0.45308(5) -0.01434(9) 0.0500(4) Uani 1 1 d . . . 
O4 O -0.23261(13) 0.44470(6) -0.11168(9) 0.0606(5) Uani 1 1 d . . . 
O5 O 0.36788(13) 0.55627(5) 0.34304(9) 0.0538(4) Uani 1 1 d . . . 
O6 O 0.46560(12) 0.52285(5) 0.31824(10) 0.0535(4) Uani 1 1 d . . . 
O7 O 0.60932(13) 0.50722(5) 0.48140(9) 0.0527(4) Uani 1 1 d . . . 
O8 O 0.64128(14) 0.43539(6) 0.50717(10) 0.0584(5) Uani 1 1 d . . . 
O1W O 0.2513(4) 0.13691(18) 0.4028(3) 0.0501(13) Uani 0.30 1 d P . . 
H1X H 0.2448 0.1366 0.4380 0.060 Uiso 0.30 1 d PR . . 
H1Y H 0.2472 0.1106 0.3876 0.060 Uiso 0.30 1 d PR . . 
O2W O 0.2930(5) 0.08472(17) 0.0380(3) 0.0630(17) Uani 0.30 1 d P . . 
H2X H 0.3406 0.0664 0.0513 0.076 Uiso 0.30 1 d PR . . 
H2Y H 0.2376 0.0738 0.0025 0.076 Uiso 0.30 1 d PR . . 
O3W O 0.1918(4) 0.1342(2) 0.0205(3) 0.0585(15) Uani 0.30 1 d P . . 
H3X H 0.1472 0.1232 0.0250 0.070 Uiso 0.30 1 d PR . . 
H3Y H 0.2229 0.1549 0.0516 0.070 Uiso 0.30 1 d PR . . 
O4W O 0.2076(5) 0.09988(18) 0.2145(3) 0.0594(16) Uani 0.30 1 d P . . 
H4X H 0.2242 0.0894 0.1874 0.071 Uiso 0.30 1 d PR . . 
H4Y H 0.2575 0.1041 0.2586 0.071 Uiso 0.30 1 d PR . . 
O5W O 0.9821(5) 0.14550(17) 0.9829(3) 0.0536(14) Uani 0.30 1 d P . . 
H5X H 0.9362 0.1428 0.9374 0.064 Uiso 0.30 1 d PR . . 
H5Y H 1.0237 0.1241 0.9971 0.064 Uiso 0.30 1 d PR . . 
O6W O 0.4651(4) 0.13756(17) 0.4599(3) 0.0525(14) Uani 0.30 1 d P . . 
H6X H 0.5106 0.1382 0.5057 0.063 Uiso 0.30 1 d PR . . 
H6Y H 0.4836 0.1205 0.4393 0.063 Uiso 0.30 1 d PR . . 
O7W O 0.7338(3) 0.42387(14) 0.2449(3) 0.0682(14) Uani 0.40 1 d P . . 
H7X H 0.6927 0.4261 0.1986 0.082 Uiso 0.40 1 d PR . . 
H7Y H 0.7358 0.4483 0.2647 0.082 Uiso 0.40 1 d PR . . 
O8W O 0.0268(3) 0.48132(14) 0.3594(2) 0.0586(12) Uani 0.40 1 d P . . 
H8X H 0.0055 0.5079 0.3491 0.070 Uiso 0.40 1 d PR . . 
H8Y H 0.0511 0.4761 0.4041 0.070 Uiso 0.40 1 d PR . . 
O9W O 0.4267(3) 0.97800(12) 0.3116(2) 0.0440(9) Uani 0.40 1 d P . . 
H9X H 0.4905 0.9754 0.3406 0.053 Uiso 0.40 1 d PR . . 
H9Y H 0.4116 0.9916 0.2731 0.053 Uiso 0.40 1 d PR . . 
O10W O 0.4996(3) 0.93353(14) 0.4461(2) 0.0590(12) Uani 0.40 1 d P . . 
H10X H 0.5394 0.9506 0.4817 0.071 Uiso 0.40 1 d PR . . 
H10Y H 0.5311 0.9103 0.4486 0.071 Uiso 0.40 1 d PR . . 
O11W O 0.6378(3) 0.47133(16) 0.3091(2) 0.0608(12) Uani 0.40 1 d P . . 
H11X H 0.6283 0.4533 0.3339 0.073 Uiso 0.40 1 d PR . . 
H11Y H 0.6203 0.4973 0.3125 0.073 Uiso 0.40 1 d PR . . 
O12W O 0.0000 0.0000 0.0000 0.0596(8) Uani 0.80 2 d SP . . 
H12X H -0.0378 -0.0204 -0.0294 0.072 Uiso 0.40 1 d PR . . 
H12Y H 0.0043 0.0208 -0.0239 0.089 Uiso 0.40 1 d PR . . 
O13W O 0.9026(4) 0.42583(14) 0.4096(2) 0.0610(12) Uani 0.40 1 d P . . 
H13X H 0.9617 0.4349 0.4256 0.073 Uiso 0.40 1 d PR . . 
H13Y H 0.8688 0.4470 0.4106 0.073 Uiso 0.40 1 d PR . . 
O14W O 0.2898(3) 0.98925(15) 0.3745(2) 0.0676(14) Uani 0.40 1 d P . . 
H14X H 0.2680 0.9630 0.3605 0.081 Uiso 0.40 1 d PR . . 
H14Y H 0.2629 1.0004 0.3945 0.081 Uiso 0.40 1 d PR . . 
S1 S 0.11174(5) 0.455393(19) 0.11349(3) 0.04883(15) Uani 1 1 d . . . 
S2 S -0.03035(5) 0.39803(2) -0.00944(3) 0.05106(15) Uani 1 1 d . . . 
S3 S 0.43929(5) 0.40324(2) 0.43644(3) 0.05143(16) Uani 1 1 d . . . 
S4 S 0.28227(5) 0.459183(19) 0.31743(4) 0.04979(15) Uani 1 1 d . . . 
 
loop_ 
 _atom_site_aniso_label 
 _atom_site_aniso_U_11 
 _atom_site_aniso_U_22 
 _atom_site_aniso_U_33 
 _atom_site_aniso_U_23 
 _atom_site_aniso_U_13 
 _atom_site_aniso_U_12 
B1 0.0406(15) 0.0419(13) 0.0532(17) 0.0014(12) 0.0213(14) -0.0026(12) 
B2 0.0411(16) 0.0419(14) 0.0447(16) -0.0002(12) 0.0138(13) 0.0002(11) 
C1 0.0357(13) 0.0490(13) 0.0434(13) 0.0075(11) 0.0099(11) -0.0088(10) 
C2 0.0395(14) 0.0515(14) 0.0411(13) -0.0034(11) 0.0085(11) -0.0143(11) 
C3 0.0430(14) 0.0511(13) 0.0320(12) -0.0076(10) 0.0125(10) -0.0155(11) 
C4 0.0454(14) 0.0354(11) 0.0488(14) -0.0077(10) 0.0202(12) -0.0094(10) 
C5 0.0450(14) 0.0410(12) 0.0397(13) -0.0114(10) 0.0167(11) -0.0147(10) 
C6 0.0386(13) 0.0484(13) 0.0388(13) -0.0089(10) 0.0115(11) -0.0132(10) 
C7 0.0374(13) 0.0511(13) 0.0510(14) -0.0112(11) 0.0208(12) -0.0149(11) 
C8 0.0349(13) 0.0523(13) 0.0433(13) 0.0092(11) 0.0133(11) -0.0196(11) 
C9 0.0389(13) 0.0441(12) 0.0451(13) -0.0081(10) 0.0153(11) -0.0150(10) 
C10 0.0368(13) 0.0453(13) 0.0496(14) -0.0140(11) 0.0156(12) -0.0089(10) 
C11 0.0466(14) 0.0446(12) 0.0405(13) 0.0000(10) 0.0191(11) -0.0156(11) 
C12 0.0368(12) 0.0429(11) 0.0326(11) 0.0029(9) 0.0159(10) -0.0001(9) 
C13 0.0376(13) 0.0486(13) 0.0435(13) 0.0206(11) 0.0153(11) 0.0145(10) 
C14 0.0408(14) 0.0510(14) 0.0444(13) 0.0174(11) 0.0151(11) 0.0135(11) 
C15 0.0388(13) 0.0517(13) 0.0334(12) 0.0074(10) 0.0100(10) 0.0119(11) 
C16 0.0408(13) 0.0487(13) 0.0430(13) -0.0099(11) 0.0170(11) 0.0054(11) 
C17 0.0442(14) 0.0539(13) 0.0280(12) -0.0001(10) 0.0087(11) 0.0122(11) 
C18 0.0352(12) 0.0446(12) 0.0361(12) -0.0006(10) 0.0120(10) 0.0135(10) 
C19 0.0470(15) 0.0438(13) 0.0505(15) 0.0188(11) 0.0152(12) 0.0121(11) 
C20 0.0476(15) 0.0512(14) 0.0451(14) 0.0199(11) 0.0161(12) 0.0232(12) 
C21 0.0384(13) 0.0459(12) 0.0293(11) 0.0057(9) 0.0085(10) 0.0132(10) 
C22 0.0347(12) 0.0383(11) 0.0302(11) 0.0034(9) 0.0107(10) 0.0109(9) 
C23 0.0344(12) 0.0337(10) 0.0337(11) 0.0036(9) 0.0146(10) -0.0100(9) 
C24 0.0377(13) 0.0417(11) 0.0398(12) -0.0120(10) 0.0164(10) -0.0066(10) 
C25 0.0388(13) 0.0388(11) 0.0477(14) -0.0161(10) 0.0146(11) 0.0021(10) 
C26 0.0524(15) 0.0436(13) 0.0428(14) -0.0155(11) 0.0165(12) -0.0110(11) 
C27 0.0490(15) 0.0485(14) 0.0419(14) -0.0093(11) 0.0129(12) 0.0003(11) 
C28 0.0504(15) 0.0424(12) 0.0373(13) 0.0086(10) 0.0148(11) 0.0058(11) 
C29 0.0387(13) 0.0491(13) 0.0336(12) -0.0026(10) 0.0138(10) -0.0083(10) 
C30 0.0452(14) 0.0428(12) 0.0423(13) -0.0130(10) 0.0180(11) -0.0136(10) 
C31 0.0366(13) 0.0426(12) 0.0444(13) -0.0182(10) 0.0104(11) -0.0150(10) 
C32 0.0442(14) 0.0400(12) 0.0505(14) -0.0128(11) 0.0175(12) -0.0107(10) 
C33 0.0495(15) 0.0457(13) 0.0404(13) -0.0005(10) 0.0156(12) -0.0162(11) 
C34 0.0405(13) 0.0402(12) 0.0457(14) -0.0004(10) 0.0120(11) -0.0055(10) 
C35 0.0381(13) 0.0458(13) 0.0445(14) 0.0015(10) 0.0094(11) -0.0098(10) 
C36 0.0432(14) 0.0419(12) 0.0392(13) 0.0102(10) 0.0152(11) -0.0036(10) 
C37 0.0388(13) 0.0447(12) 0.0447(13) 0.0081(10) 0.0138(11) 0.0061(10) 
C38 0.0476(14) 0.0386(11) 0.0429(13) 0.0114(10) 0.0213(12) 0.0027(10) 
C39 0.0483(15) 0.0472(13) 0.0507(15) 0.0116(11) 0.0225(12) 0.0100(11) 
C40 0.0555(17) 0.0481(13) 0.0473(15) -0.0101(11) 0.0139(13) 0.0111(12) 
C41 0.0450(14) 0.0407(12) 0.0473(14) 0.0134(10) 0.0229(11) -0.0024(10) 
C42 0.0423(14) 0.0510(14) 0.0526(15) -0.0172(12) 0.0137(12) 0.0025(11) 
C43 0.0410(13) 0.0444(12) 0.0329(12) -0.0011(10) 0.0104(10) -0.0003(10) 
C44 0.0497(15) 0.0442(13) 0.0450(14) 0.0042(11) 0.0147(12) 0.0068(11) 
C45 0.0455(14) 0.0381(12) 0.0513(14) 0.0071(10) 0.0214(12) 0.0082(10) 
C46 0.0513(15) 0.0377(12) 0.0482(14) -0.0040(10) 0.0210(12) -0.0028(11) 
C47 0.0414(13) 0.0431(12) 0.0361(12) -0.0079(10) 0.0153(10) -0.0061(10) 
C48 0.0448(14) 0.0425(12) 0.0376(13) 0.0069(10) 0.0117(11) 0.0011(10) 
C49 0.0520(15) 0.0398(12) 0.0442(14) 0.0141(10) 0.0195(12) 0.0043(11) 
C50 0.0402(14) 0.0480(13) 0.0458(14) -0.0019(11) 0.0127(11) -0.0101(11) 
C51 0.0489(15) 0.0466(13) 0.0419(14) -0.0025(11) 0.0149(12) -0.0088(11) 
C52 0.0501(15) 0.0413(12) 0.0474(15) -0.0007(11) 0.0177(13) -0.0020(11) 
C53 0.0416(13) 0.0393(12) 0.0411(13) -0.0051(10) 0.0142(11) -0.0082(10) 
C54 0.0391(13) 0.0431(12) 0.0464(14) -0.0159(10) 0.0114(11) -0.0160(10) 
C55 0.0432(14) 0.0411(12) 0.0510(14) -0.0155(11) 0.0233(12) -0.0112(10) 
C56 0.0459(14) 0.0443(12) 0.0389(13) -0.0166(10) 0.0195(11) -0.0119(11) 
C57 0.0355(13) 0.0468(13) 0.0561(15) -0.0203(12) 0.0119(12) -0.0167(11) 
C58 0.0562(16) 0.0400(12) 0.0471(14) 0.0165(11) 0.0187(13) 0.0082(11) 
C59 0.0482(14) 0.0357(11) 0.0432(13) -0.0119(10) 0.0176(12) -0.0112(10) 
C60 0.0454(14) 0.0409(12) 0.0505(15) -0.0044(11) 0.0192(12) -0.0027(11) 
Co1 0.03387(16) 0.03423(14) 0.02967(14) -0.00281(11) 0.01274(12) -0.00384(12) 
Fe1 0.03577(18) 0.03700(16) 0.03544(17) -0.00476(13) 0.01247(14) -0.00277(13) 
Fe2 0.03522(17) 0.03267(15) 0.03170(16) 0.00565(12) 0.01367(14) -0.00942(12) 
N1 0.0402(11) 0.0474(11) 0.0394(11) -0.0011(9) 0.0102(9) -0.0061(9) 
N2 0.0408(11) 0.0463(10) 0.0375(10) 0.0012(8) 0.0136(9) -0.0044(9) 
N3 0.0468(12) 0.0407(10) 0.0425(11) -0.0079(8) 0.0191(10) -0.0007(9) 
N4 0.0391(11) 0.0403(10) 0.0344(10) -0.0052(8) 0.0114(8) -0.0066(8) 
N5 0.0333(10) 0.0435(10) 0.0488(12) -0.0011(9) 0.0167(9) -0.0047(8) 
N6 0.0390(11) 0.0426(10) 0.0470(12) -0.0007(9) 0.0164(10) -0.0029(8) 
N7 0.0466(12) 0.0479(11) 0.0473(12) -0.0149(9) 0.0184(10) -0.0138(9) 
N8 0.0385(11) 0.0450(10) 0.0463(11) 0.0099(9) 0.0144(9) -0.0178(8) 
N9 0.0376(11) 0.0414(10) 0.0392(10) -0.0036(8) 0.0146(9) -0.0069(8) 
N10 0.0406(11) 0.0449(10) 0.0407(11) 0.0194(9) 0.0161(9) 0.0133(9) 
N11 0.0373(11) 0.0477(11) 0.0356(10) 0.0030(8) 0.0117(9) 0.0058(9) 
N12 0.0405(11) 0.0453(10) 0.0382(11) -0.0012(8) 0.0129(9) 0.0005(9) 
N13 0.0358(10) 0.0413(10) 0.0367(10) -0.0042(8) 0.0110(8) 0.0052(8) 
N14 0.0367(10) 0.0329(8) 0.0318(9) 0.0057(7) 0.0133(8) -0.0097(7) 
N15 0.0358(10) 0.0342(9) 0.0323(9) 0.0068(7) 0.0132(8) -0.0090(7) 
N16 0.0427(11) 0.0479(11) 0.0445(11) -0.0132(9) 0.0175(10) 0.0031(9) 
N17 0.0463(11) 0.0352(9) 0.0346(10) 0.0052(8) 0.0147(9) -0.0085(8) 
N18 0.0340(10) 0.0422(10) 0.0418(11) -0.0002(8) 0.0130(9) 0.0002(8) 
N19 0.0484(12) 0.0392(10) 0.0316(10) -0.0069(8) 0.0139(9) -0.0064(8) 
N20 0.0412(11) 0.0408(10) 0.0407(11) -0.0054(8) 0.0162(9) -0.0090(8) 
N21 0.0412(11) 0.0425(10) 0.0414(11) -0.0079(8) 0.0174(9) -0.0013(8) 
N22 0.0480(12) 0.0410(10) 0.0298(10) -0.0023(8) 0.0120(9) -0.0109(8) 
O1 0.0523(10) 0.0422(8) 0.0497(10) -0.0018(7) 0.0226(9) 0.0148(8) 
O2 0.0496(11) 0.0456(9) 0.0507(10) 0.0052(7) 0.0226(9) 0.0157(8) 
O3 0.0428(9) 0.0432(8) 0.0501(10) -0.0174(7) 0.0186(8) 0.0067(7) 
O4 0.0516(11) 0.0585(10) 0.0390(9) 0.0127(8) 0.0070(8) 0.0071(9) 
O5 0.0506(10) 0.0422(9) 0.0526(10) 0.0132(8) 0.0202(9) -0.0045(8) 
O6 0.0413(10) 0.0486(9) 0.0540(10) 0.0118(8) 0.0178(8) -0.0044(8) 
O7 0.0464(10) 0.0427(8) 0.0528(10) -0.0177(8) 0.0190(8) -0.0159(7) 
O8 0.0525(11) 0.0492(9) 0.0488(10) -0.0006(8) 0.0147(9) 0.0028(8) 
O1W 0.041(3) 0.055(3) 0.049(3) -0.004(3) 0.023(3) 0.005(3) 
O2W 0.063(4) 0.038(3) 0.048(3) -0.014(3) 0.009(3) -0.007(3) 
O3W 0.040(3) 0.065(4) 0.048(3) -0.005(3) 0.013(3) -0.012(3) 
O4W 0.065(4) 0.047(3) 0.049(3) -0.003(3) 0.022(3) -0.004(3) 
O5W 0.067(4) 0.041(3) 0.054(4) -0.009(2) 0.035(3) 0.005(3) 
O6W 0.052(3) 0.049(3) 0.039(3) 0.000(2) 0.015(3) 0.012(3) 
O7W 0.058(3) 0.044(2) 0.057(3) 0.017(2) 0.006(2) 0.001(2) 
O8W 0.052(3) 0.048(2) 0.052(3) -0.009(2) 0.016(2) -0.008(2) 
O9W 0.041(2) 0.040(2) 0.034(2) 0.0021(16) 0.0113(18) 0.0082(17) 
O10W 0.049(3) 0.053(2) 0.055(3) 0.009(2) 0.018(2) -0.004(2) 
O11W 0.046(3) 0.069(3) 0.051(3) 0.009(2) 0.018(2) -0.002(2) 
O12W 0.054(2) 0.0527(17) 0.0457(17) -0.0098(14) 0.0131(15) -0.0013(15) 
O13W 0.056(3) 0.055(2) 0.046(2) -0.002(2) 0.014(2) 0.002(2) 
O14W 0.056(3) 0.052(2) 0.042(2) 0.004(2) -0.003(2) 0.002(2) 
S1 0.0467(3) 0.0422(3) 0.0415(3) 0.0057(2) 0.0159(3) 0.0027(3) 
S2 0.0435(3) 0.0474(3) 0.0426(3) 0.0064(3) 0.0133(3) 0.0065(3) 
S3 0.0418(3) 0.0477(3) 0.0441(3) -0.0175(3) 0.0126(3) -0.0130(3) 
S4 0.0419(3) 0.0424(3) 0.0496(3) -0.0093(3) 0.0173(3) -0.0110(2) 
 
_geom_special_details 
; 
 All esds (except the esd in the dihedral angle between two l.s. planes) 
 are estimated using the full covariance matrix.  The cell esds are taken 
 into account individually in the estimation of esds in distances, angles 
 and torsion angles; correlations between esds in cell parameters are only 
 used when they are defined by crystal symmetry.  An approximate (isotropic) 
 treatment of cell esds is used for estimating esds involving l.s. planes. 
; 
 
loop_ 
 _geom_bond_atom_site_label_1 
 _geom_bond_atom_site_label_2 
 _geom_bond_distance 
 _geom_bond_site_symmetry_2 
 _geom_bond_publ_flag 
B1 N5 1.474(3) . ? 
B1 N1 1.533(3) . ? 
B1 N3 1.561(3) . ? 
B1 H1A 0.9800 . ? 
B2 N14 1.525(3) . ? 
B2 N12 1.552(3) . ? 
B2 N10 1.559(3) . ? 
B2 H2A 0.9800 . ? 
C1 N1 1.336(2) . ? 
C1 C2 1.366(4) . ? 
C1 H1 0.9300 . ? 
C2 C3 1.381(3) . ? 
C2 H2 0.9300 . ? 
C3 N2 1.359(2) . ? 
C3 H3 0.9300 . ? 
C4 C5 1.284(3) . ? 
C4 N3 1.339(2) . ? 
C4 H4 0.9300 . ? 
C5 C6 1.421(3) . ? 
C5 H5 0.9300 . ? 
C6 N4 1.373(2) . ? 
C6 H6 0.9300 . ? 
C7 N5 1.357(2) . ? 
C7 C8 1.419(3) . ? 
C7 H7 0.9300 . ? 
C8 C9 1.411(3) . ? 
C8 H8 0.9300 . ? 
C9 N6 1.350(2) . ? 
C9 H9 0.9300 . ? 
C10 N7 1.146(2) . ? 
C10 Fe1 1.906(2) . ? 
C11 N8 1.120(2) . ? 
C11 Fe1 1.922(2) . ? 
C12 N9 1.142(2) . ? 
C12 Fe1 1.899(2) . ? 
C13 N10 1.344(2) . ? 
C13 C14 1.346(3) . ? 
C13 H13 0.9300 . ? 
C14 C15 1.415(4) . ? 
C14 H14 0.9300 . ? 
C15 N11 1.336(2) . ? 
C15 H15 0.9300 . ? 
C16 N12 1.287(2) . ? 
C16 C17 1.348(4) . ? 
C16 H16 0.9300 . ? 
C17 C18 1.392(3) . ? 
C17 H17 0.9300 . ? 
C18 N13 1.369(2) . ? 
C18 H18 0.9300 . ? 
C19 C20 1.378(4) . ? 
C19 N14 1.379(2) . ? 
C19 H19 0.9300 . ? 
C20 C21 1.378(3) . ? 
C20 H20 0.9300 . ? 
C21 N15 1.357(2) . ? 
C21 H21 0.9300 . ? 
C22 N16 1.141(2) . ? 
C22 Fe2 1.930(2) . ? 
C23 N17 1.1237(19) . ? 
C23 Fe2 1.9216(19) . ? 
C24 N18 1.167(2) . ? 
C24 Fe2 1.874(2) . ? 
C25 N19 1.381(2) . ? 
C25 C26 1.455(3) . ? 
C25 H25 0.9300 . ? 
C26 C27 1.310(4) . ? 
C26 H26 0.9300 . ? 
C27 C28 1.362(3) . ? 
C27 H27 0.9300 . ? 
C28 C29 1.387(3) . ? 
C28 H28 0.9300 . ? 
C29 N19 1.325(2) . ? 
C29 C35 1.479(3) . ? 
C30 N20 1.347(2) . ? 
C30 C31 1.384(3) . ? 
C30 H30 0.9300 . ? 
C31 C32 1.395(3) . ? 
C31 H31 0.9300 . ? 
C32 C33 1.423(3) . ? 
C32 H32 0.9300 . ? 
C33 C34 1.369(3) . ? 
C33 H33 0.9300 . ? 
C34 N20 1.336(2) . ? 
C34 C35 1.506(3) . ? 
C35 C36 1.362(3) . ? 
C36 S2 1.722(2) . ? 
C36 S1 1.746(2) . ? 
C37 C38 1.395(3) . ? 
C37 C41 1.480(3) . ? 
C37 S2 1.740(2) . ? 
C38 C39 1.496(3) . ? 
C38 S1 1.706(2) . ? 
C39 O2 1.251(2) . ? 
C39 O1 1.261(3) . ? 
C40 O1 1.430(2) . ? 
C40 H40A 0.9600 . ? 
C40 H40B 0.9600 . ? 
C40 H40C 0.9600 . ? 
C41 O4 1.126(2) . ? 
C41 O3 1.344(3) . ? 
C42 O3 1.584(2) . ? 
C42 H42A 0.9600 . ? 
C42 H42B 0.9600 . ? 
C42 H42C 0.9600 . ? 
C43 N21 1.341(2) . ? 
C43 C44 1.385(3) . ? 
C43 H43 0.9300 . ? 
C44 C45 1.361(3) . ? 
C44 H44 0.9300 . ? 
C45 C46 1.347(3) . ? 
C45 H45 0.9300 . ? 
C46 C47 1.394(3) . ? 
C46 H46 0.9300 . ? 
C47 N21 1.374(2) . ? 
C47 C53 1.486(3) . ? 
C48 N22 1.343(2) . ? 
C48 C49 1.385(3) . ? 
C48 H48 0.9300 . ? 
C49 C50 1.403(3) . ? 
C49 H49 0.9300 . ? 
C50 C51 1.390(3) . ? 
C50 H50 0.9300 . ? 
C51 C52 1.401(4) . ? 
C51 H51 0.9300 . ? 
C52 N22 1.344(2) . ? 
C52 C53 1.467(3) . ? 
C53 C54 1.331(3) . ? 
C54 S4 1.755(3) . ? 
C54 S3 1.778(2) . ? 
C55 C56 1.359(3) . ? 
C55 C57 1.483(3) . ? 
C55 S4 1.726(2) . ? 
C56 C59 1.498(3) . ? 
C56 S3 1.744(2) . ? 
C57 O5 1.222(3) . ? 
C57 O6 1.256(3) . ? 
C58 O6 1.547(2) . ? 
C58 H58A 0.9600 . ? 
C58 H58B 0.9600 . ? 
C58 H58C 0.9600 . ? 
C59 O7 1.230(2) . ? 
C59 O8 1.235(2) . ? 
C60 O8 1.479(2) . ? 
C60 H60A 0.9600 . ? 
C60 H60B 0.9600 . ? 
C60 H60C 0.9600 . ? 
Co1 N18 2.0743(19) . ? 
Co1 N9 2.0795(18) . ? 
Co1 N22 2.1562(19) . ? 
Co1 N19 2.1639(18) . ? 
Co1 N21 2.1642(19) . ? 
Co1 N20 2.1747(19) . ? 
Fe1 N4 1.9462(19) . ? 
Fe1 N6 1.965(2) . ? 
Fe1 N2 1.9654(19) . ? 
Fe2 N13 1.9766(18) . ? 
Fe2 N11 1.984(2) . ? 
Fe2 N15 1.9948(16) . ? 
N1 N2 1.387(3) . ? 
N3 N4 1.396(3) . ? 
N5 N6 1.389(3) . ? 
N10 N11 1.350(3) . ? 
N12 N13 1.368(3) . ? 
N14 N15 1.359(2) . ? 
O1W H1X 0.8499 . ? 
O1W H1Y 0.8501 . ? 
O2W H2X 0.8501 . ? 
O2W H2Y 0.8501 . ? 
O3W H3X 0.8501 . ? 
O3W H3Y 0.8500 . ? 
O4W H4X 0.8499 . ? 
O4W H4Y 0.8500 . ? 
O5W H5X 0.8500 . ? 
O5W H5Y 0.8500 . ? 
O6W H6X 0.8498 . ? 
O6W H6Y 0.8501 . ? 
O7W H7X 0.8500 . ? 
O7W H7Y 0.8500 . ? 
O8W H8X 0.8500 . ? 
O8W H8Y 0.8499 . ? 
O9W H9X 0.8500 . ? 
O9W H9Y 0.8499 . ? 
O10W H10X 0.8500 . ? 
O10W H10Y 0.8501 . ? 
O11W H11X 0.8501 . ? 
O11W H11Y 0.8501 . ? 
O12W H12X 0.8500 . ? 
O12W H12Y 0.8500 . ? 
O13W H13X 0.8499 . ? 
O13W H13Y 0.8497 . ? 
O14W H14X 0.8501 . ? 
O14W H14Y 0.8499 . ? 
 
loop_ 
 _geom_angle_atom_site_label_1 
 _geom_angle_atom_site_label_2 
 _geom_angle_atom_site_label_3 
 _geom_angle 
 _geom_angle_site_symmetry_1 
 _geom_angle_site_symmetry_3 
 _geom_angle_publ_flag 
N5 B1 N1 109.81(18) . . ? 
N5 B1 N3 109.54(18) . . ? 
N1 B1 N3 106.75(17) . . ? 
N5 B1 H1A 110.2 . . ? 
N1 B1 H1A 110.2 . . ? 
N3 B1 H1A 110.2 . . ? 
N14 B2 N12 107.18(18) . . ? 
N14 B2 N10 106.45(16) . . ? 
N12 B2 N10 107.33(17) . . ? 
N14 B2 H2A 111.9 . . ? 
N12 B2 H2A 111.9 . . ? 
N10 B2 H2A 111.9 . . ? 
N1 C1 C2 108.7(2) . . ? 
N1 C1 H1 125.7 . . ? 
C2 C1 H1 125.7 . . ? 
C1 C2 C3 107.0(2) . . ? 
C1 C2 H2 126.5 . . ? 
C3 C2 H2 126.5 . . ? 
N2 C3 C2 108.8(2) . . ? 
N2 C3 H3 125.6 . . ? 
C2 C3 H3 125.6 . . ? 
C5 C4 N3 108.1(2) . . ? 
C5 C4 H4 126.0 . . ? 
N3 C4 H4 126.0 . . ? 
C4 C5 C6 110.3(2) . . ? 
C4 C5 H5 124.9 . . ? 
C6 C5 H5 124.9 . . ? 
N4 C6 C5 106.2(2) . . ? 
N4 C6 H6 126.9 . . ? 
C5 C6 H6 126.9 . . ? 
N5 C7 C8 107.8(2) . . ? 
N5 C7 H7 126.1 . . ? 
C8 C7 H7 126.1 . . ? 
C9 C8 C7 104.92(19) . . ? 
C9 C8 H8 127.5 . . ? 
C7 C8 H8 127.5 . . ? 
N6 C9 C8 110.3(2) . . ? 
N6 C9 H9 124.8 . . ? 
C8 C9 H9 124.8 . . ? 
N7 C10 Fe1 179.0(2) . . ? 
N8 C11 Fe1 179.3(2) . . ? 
N9 C12 Fe1 174.51(18) . . ? 
N10 C13 C14 105.7(2) . . ? 
N10 C13 H13 127.1 . . ? 
C14 C13 H13 127.1 . . ? 
C13 C14 C15 109.3(2) . . ? 
C13 C14 H14 125.4 . . ? 
C15 C14 H14 125.4 . . ? 
N11 C15 C14 105.7(2) . . ? 
N11 C15 H15 127.2 . . ? 
C14 C15 H15 127.2 . . ? 
N12 C16 C17 111.5(2) . . ? 
N12 C16 H16 124.2 . . ? 
C17 C16 H16 124.2 . . ? 
C16 C17 C18 105.8(2) . . ? 
C16 C17 H17 127.1 . . ? 
C18 C17 H17 127.1 . . ? 
N13 C18 C17 106.7(2) . . ? 
N13 C18 H18 126.6 . . ? 
C17 C18 H18 126.6 . . ? 
C20 C19 N14 107.9(2) . . ? 
C20 C19 H19 126.1 . . ? 
N14 C19 H19 126.1 . . ? 
C19 C20 C21 106.7(2) . . ? 
C19 C20 H20 126.6 . . ? 
C21 C20 H20 126.6 . . ? 
N15 C21 C20 109.0(2) . . ? 
N15 C21 H21 125.5 . . ? 
C20 C21 H21 125.5 . . ? 
N16 C22 Fe2 175.44(17) . . ? 
N17 C23 Fe2 176.69(19) . . ? 
N18 C24 Fe2 172.68(17) . . ? 
N19 C25 C26 117.9(2) . . ? 
N19 C25 H25 121.0 . . ? 
C26 C25 H25 121.0 . . ? 
C27 C26 C25 120.1(2) . . ? 
C27 C26 H26 120.0 . . ? 
C25 C26 H26 120.0 . . ? 
C26 C27 C28 120.9(2) . . ? 
C26 C27 H27 119.5 . . ? 
C28 C27 H27 119.5 . . ? 
C27 C28 C29 119.4(2) . . ? 
C27 C28 H28 120.3 . . ? 
C29 C28 H28 120.3 . . ? 
N19 C29 C28 122.0(2) . . ? 
N19 C29 C35 116.14(19) . . ? 
C28 C29 C35 121.9(2) . . ? 
N20 C30 C31 122.9(2) . . ? 
N20 C30 H30 118.6 . . ? 
C31 C30 H30 118.6 . . ? 
C30 C31 C32 118.5(2) . . ? 
C30 C31 H31 120.7 . . ? 
C32 C31 H31 120.7 . . ? 
C31 C32 C33 118.0(2) . . ? 
C31 C32 H32 121.0 . . ? 
C33 C32 H32 121.0 . . ? 
C34 C33 C32 119.2(2) . . ? 
C34 C33 H33 120.4 . . ? 
C32 C33 H33 120.4 . . ? 
N20 C34 C33 122.4(2) . . ? 
N20 C34 C35 118.01(19) . . ? 
C33 C34 C35 119.4(2) . . ? 
C36 C35 C29 121.8(2) . . ? 
C36 C35 C34 121.8(2) . . ? 
C29 C35 C34 116.4(2) . . ? 
C35 C36 S2 122.52(18) . . ? 
C35 C36 S1 122.42(18) . . ? 
S2 C36 S1 114.85(14) . . ? 
C38 C37 C41 133.7(2) . . ? 
C38 C37 S2 113.12(18) . . ? 
C41 C37 S2 113.18(18) . . ? 
C37 C38 C39 125.4(2) . . ? 
C37 C38 S1 119.59(18) . . ? 
C39 C38 S1 114.97(18) . . ? 
O2 C39 O1 126.2(2) . . ? 
O2 C39 C38 121.0(2) . . ? 
O1 C39 C38 112.7(2) . . ? 
O1 C40 H40A 109.5 . . ? 
O1 C40 H40B 109.5 . . ? 
H40A C40 H40B 109.5 . . ? 
O1 C40 H40C 109.5 . . ? 
H40A C40 H40C 109.5 . . ? 
H40B C40 H40C 109.5 . . ? 
O4 C41 O3 128.1(2) . . ? 
O4 C41 C37 123.5(2) . . ? 
O3 C41 C37 108.36(19) . . ? 
O3 C42 H42A 109.5 . . ? 
O3 C42 H42B 109.5 . . ? 
H42A C42 H42B 109.5 . . ? 
O3 C42 H42C 109.5 . . ? 
H42A C42 H42C 109.5 . . ? 
H42B C42 H42C 109.5 . . ? 
N21 C43 C44 124.3(2) . . ? 
N21 C43 H43 117.8 . . ? 
C44 C43 H43 117.8 . . ? 
C45 C44 C43 116.3(2) . . ? 
C45 C44 H44 121.8 . . ? 
C43 C44 H44 121.8 . . ? 
C46 C45 C44 122.3(2) . . ? 
C46 C45 H45 118.8 . . ? 
C44 C45 H45 118.8 . . ? 
C45 C46 C47 119.1(2) . . ? 
C45 C46 H46 120.5 . . ? 
C47 C46 H46 120.5 . . ? 
N21 C47 C46 120.6(2) . . ? 
N21 C47 C53 116.95(19) . . ? 
C46 C47 C53 122.4(2) . . ? 
N22 C48 C49 124.1(2) . . ? 
N22 C48 H48 118.0 . . ? 
C49 C48 H48 118.0 . . ? 
C48 C49 C50 117.2(2) . . ? 
C48 C49 H49 121.4 . . ? 
C50 C49 H49 121.4 . . ? 
C51 C50 C49 119.9(2) . . ? 
C51 C50 H50 120.1 . . ? 
C49 C50 H50 120.1 . . ? 
C50 C51 C52 117.8(2) . . ? 
C50 C51 H51 121.1 . . ? 
C52 C51 H51 121.1 . . ? 
N22 C52 C51 122.9(2) . . ? 
N22 C52 C53 117.6(2) . . ? 
C51 C52 C53 119.4(2) . . ? 
C54 C53 C52 122.0(2) . . ? 
C54 C53 C47 120.3(2) . . ? 
C52 C53 C47 117.6(2) . . ? 
C53 C54 S4 124.86(19) . . ? 
C53 C54 S3 123.0(2) . . ? 
S4 C54 S3 112.09(12) . . ? 
C56 C55 C57 126.9(2) . . ? 
C56 C55 S4 118.18(18) . . ? 
C57 C55 S4 114.80(19) . . ? 
C55 C56 C59 125.1(2) . . ? 
C55 C56 S3 115.70(18) . . ? 
C59 C56 S3 119.06(18) . . ? 
O5 C57 O6 124.7(2) . . ? 
O5 C57 C55 123.0(2) . . ? 
O6 C57 C55 111.2(2) . . ? 
O6 C58 H58A 109.5 . . ? 
O6 C58 H58B 109.5 . . ? 
H58A C58 H58B 109.5 . . ? 
O6 C58 H58C 109.5 . . ? 
H58A C58 H58C 109.5 . . ? 
H58B C58 H58C 109.5 . . ? 
O7 C59 O8 128.8(2) . . ? 
O7 C59 C56 120.0(2) . . ? 
O8 C59 C56 111.16(18) . . ? 
O8 C60 H60A 109.5 . . ? 
O8 C60 H60B 109.5 . . ? 
H60A C60 H60B 109.5 . . ? 
O8 C60 H60C 109.5 . . ? 
H60A C60 H60C 109.5 . . ? 
H60B C60 H60C 109.5 . . ? 
N18 Co1 N9 93.10(8) . . ? 
N18 Co1 N22 88.59(8) . . ? 
N9 Co1 N22 87.64(7) . . ? 
N18 Co1 N19 87.60(7) . . ? 
N9 Co1 N19 89.25(7) . . ? 
N22 Co1 N19 174.95(7) . . ? 
N18 Co1 N21 172.24(7) . . ? 
N9 Co1 N21 88.59(8) . . ? 
N22 Co1 N21 83.91(8) . . ? 
N19 Co1 N21 100.00(7) . . ? 
N18 Co1 N20 89.92(8) . . ? 
N9 Co1 N20 172.89(7) . . ? 
N22 Co1 N20 98.88(7) . . ? 
N19 Co1 N20 84.43(7) . . ? 
N21 Co1 N20 89.28(8) . . ? 
C12 Fe1 C10 88.41(10) . . ? 
C12 Fe1 C11 86.89(10) . . ? 
C10 Fe1 C11 89.71(11) . . ? 
C12 Fe1 N4 88.98(7) . . ? 
C10 Fe1 N4 177.38(7) . . ? 
C11 Fe1 N4 89.85(7) . . ? 
C12 Fe1 N6 177.08(7) . . ? 
C10 Fe1 N6 93.19(7) . . ? 
C11 Fe1 N6 95.56(7) . . ? 
N4 Fe1 N6 89.42(8) . . ? 
C12 Fe1 N2 90.40(6) . . ? 
C10 Fe1 N2 91.18(8) . . ? 
C11 Fe1 N2 177.12(7) . . ? 
N4 Fe1 N2 89.13(8) . . ? 
N6 Fe1 N2 87.12(8) . . ? 
C24 Fe2 C23 89.09(10) . . ? 
C24 Fe2 C22 88.05(9) . . ? 
C23 Fe2 C22 88.21(9) . . ? 
C24 Fe2 N13 89.36(6) . . ? 
C23 Fe2 N13 92.98(6) . . ? 
C22 Fe2 N13 177.14(6) . . ? 
C24 Fe2 N11 176.80(6) . . ? 
C23 Fe2 N11 92.70(7) . . ? 
C22 Fe2 N11 94.65(7) . . ? 
N13 Fe2 N11 87.90(8) . . ? 
C24 Fe2 N15 88.72(7) . . ? 
C23 Fe2 N15 177.58(6) . . ? 
C22 Fe2 N15 90.69(6) . . ? 
N13 Fe2 N15 88.03(8) . . ? 
N11 Fe2 N15 89.53(8) . . ? 
C1 N1 N2 109.11(17) . . ? 
C1 N1 B1 134.32(16) . . ? 
N2 N1 B1 116.57(15) . . ? 
C3 N2 N1 106.41(15) . . ? 
C3 N2 Fe1 133.78(14) . . ? 
N1 N2 Fe1 119.67(15) . . ? 
C4 N3 N4 110.74(15) . . ? 
C4 N3 B1 133.90(15) . . ? 
N4 N3 B1 115.14(14) . . ? 
C6 N4 N3 104.75(14) . . ? 
C6 N4 Fe1 134.20(13) . . ? 
N3 N4 Fe1 120.85(13) . . ? 
C7 N5 N6 109.94(15) . . ? 
C7 N5 B1 132.56(16) . . ? 
N6 N5 B1 117.50(15) . . ? 
C9 N6 N5 106.88(16) . . ? 
C9 N6 Fe1 133.51(13) . . ? 
N5 N6 Fe1 119.61(14) . . ? 
C12 N9 Co1 156.92(14) . . ? 
C13 N10 N11 111.01(15) . . ? 
C13 N10 B2 129.70(16) . . ? 
N11 N10 B2 119.26(16) . . ? 
C15 N11 N10 108.32(16) . . ? 
C15 N11 Fe2 132.58(13) . . ? 
N10 N11 Fe2 119.09(14) . . ? 
C16 N12 N13 108.50(17) . . ? 
C16 N12 B2 134.35(16) . . ? 
N13 N12 B2 117.13(15) . . ? 
N12 N13 C18 107.34(15) . . ? 
N12 N13 Fe2 120.63(15) . . ? 
C18 N13 Fe2 131.99(13) . . ? 
N15 N14 C19 108.28(14) . . ? 
N15 N14 B2 120.12(13) . . ? 
C19 N14 B2 131.37(16) . . ? 
C21 N15 N14 108.07(13) . . ? 
C21 N15 Fe2 133.61(11) . . ? 
N14 N15 Fe2 118.25(13) . . ? 
C24 N18 Co1 157.83(14) . . ? 
C29 N19 C25 119.56(15) . . ? 
C29 N19 Co1 123.84(11) . . ? 
C25 N19 Co1 115.81(11) . . ? 
C34 N20 C30 118.99(15) . . ? 
C34 N20 Co1 121.41(12) . . ? 
C30 N20 Co1 119.52(11) . . ? 
C43 N21 C47 117.30(14) . . ? 
C43 N21 Co1 119.84(11) . . ? 
C47 N21 Co1 122.86(12) . . ? 
C48 N22 C52 117.75(15) . . ? 
C48 N22 Co1 118.33(11) . . ? 
C52 N22 Co1 123.82(11) . . ? 
C39 O1 C40 114.85(15) . . ? 
C41 O3 C42 104.17(15) . . ? 
C57 O6 C58 119.74(15) . . ? 
C59 O8 C60 114.14(14) . . ? 
H1X O1W H1Y 109.5 . . ? 
H2X O2W H2Y 109.5 . . ? 
H3X O3W H3Y 109.5 . . ? 
H4X O4W H4Y 113.3 . . ? 
H5X O5W H5Y 109.5 . . ? 
H6X O6W H6Y 109.5 . . ? 
H7X O7W H7Y 109.5 . . ? 
H8X O8W H8Y 109.5 . . ? 
H9X O9W H9Y 109.5 . . ? 
H10X O10W H10Y 109.5 . . ? 
H11X O11W H11Y 109.8 . . ? 
H12X O12W H12Y 109.5 . . ? 
H13X O13W H13Y 109.5 . . ? 
H14X O14W H14Y 109.5 . . ? 
C38 S1 C36 94.61(11) . . ? 
C36 S2 C37 96.94(12) . . ? 
C56 S3 C54 96.45(11) . . ? 
C55 S4 C54 96.36(11) . . ? 
 
loop_ 
 _geom_torsion_atom_site_label_1 
 _geom_torsion_atom_site_label_2 
 _geom_torsion_atom_site_label_3 
 _geom_torsion_atom_site_label_4 
 _geom_torsion 
 _geom_torsion_site_symmetry_1 
 _geom_torsion_site_symmetry_2 
 _geom_torsion_site_symmetry_3 
 _geom_torsion_site_symmetry_4 
 _geom_torsion_publ_flag 
N1 C1 C2 C3 0.0(2) . . . . ? 
C1 C2 C3 N2 -0.8(2) . . . . ? 
N3 C4 C5 C6 -0.3(3) . . . . ? 
C4 C5 C6 N4 0.3(3) . . . . ? 
N5 C7 C8 C9 4.5(3) . . . . ? 
C7 C8 C9 N6 -3.6(3) . . . . ? 
N10 C13 C14 C15 1.5(3) . . . . ? 
C13 C14 C15 N11 -1.0(3) . . . . ? 
N12 C16 C17 C18 2.2(3) . . . . ? 
C16 C17 C18 N13 -2.4(2) . . . . ? 
N14 C19 C20 C21 -1.6(3) . . . . ? 
C19 C20 C21 N15 1.8(3) . . . . ? 
N19 C25 C26 C27 2.0(4) . . . . ? 
C25 C26 C27 C28 1.1(4) . . . . ? 
C26 C27 C28 C29 -2.8(4) . . . . ? 
C27 C28 C29 N19 1.4(4) . . . . ? 
C27 C28 C29 C35 -177.9(2) . . . . ? 
N20 C30 C31 C32 -0.7(4) . . . . ? 
C30 C31 C32 C33 -1.6(4) . . . . ? 
C31 C32 C33 C34 3.1(4) . . . . ? 
C32 C33 C34 N20 -2.3(4) . . . . ? 
C32 C33 C34 C35 -178.2(2) . . . . ? 
N19 C29 C35 C36 -118.2(3) . . . . ? 
C28 C29 C35 C36 61.1(4) . . . . ? 
N19 C29 C35 C34 62.8(3) . . . . ? 
C28 C29 C35 C34 -117.9(3) . . . . ? 
N20 C34 C35 C36 127.9(2) . . . . ? 
C33 C34 C35 C36 -56.1(4) . . . . ? 
N20 C34 C35 C29 -53.1(3) . . . . ? 
C33 C34 C35 C29 123.0(3) . . . . ? 
C29 C35 C36 S2 1.0(4) . . . . ? 
C34 C35 C36 S2 -179.98(19) . . . . ? 
C29 C35 C36 S1 175.50(19) . . . . ? 
C34 C35 C36 S1 -5.5(4) . . . . ? 
C41 C37 C38 C39 2.9(4) . . . . ? 
S2 C37 C38 C39 -178.33(19) . . . . ? 
C41 C37 C38 S1 179.8(2) . . . . ? 
S2 C37 C38 S1 -1.4(3) . . . . ? 
C37 C38 C39 O2 -22.8(4) . . . . ? 
S1 C38 C39 O2 160.20(18) . . . . ? 
C37 C38 C39 O1 160.1(2) . . . . ? 
S1 C38 C39 O1 -16.9(3) . . . . ? 
C38 C37 C41 O4 128.0(3) . . . . ? 
S2 C37 C41 O4 -50.8(3) . . . . ? 
C38 C37 C41 O3 -51.4(3) . . . . ? 
S2 C37 C41 O3 129.85(16) . . . . ? 
N21 C43 C44 C45 1.2(4) . . . . ? 
C43 C44 C45 C46 -1.6(4) . . . . ? 
C44 C45 C46 C47 0.7(4) . . . . ? 
C45 C46 C47 N21 0.5(4) . . . . ? 
C45 C46 C47 C53 -176.0(2) . . . . ? 
N22 C48 C49 C50 -3.9(4) . . . . ? 
C48 C49 C50 C51 5.7(4) . . . . ? 
C49 C50 C51 C52 -6.9(4) . . . . ? 
C50 C51 C52 N22 6.4(4) . . . . ? 
C50 C51 C52 C53 -178.7(2) . . . . ? 
N22 C52 C53 C54 -124.5(3) . . . . ? 
C51 C52 C53 C54 60.3(4) . . . . ? 
N22 C52 C53 C47 58.1(3) . . . . ? 
C51 C52 C53 C47 -117.1(3) . . . . ? 
N21 C47 C53 C54 129.1(2) . . . . ? 
C46 C47 C53 C54 -54.2(4) . . . . ? 
N21 C47 C53 C52 -53.4(3) . . . . ? 
C46 C47 C53 C52 123.2(3) . . . . ? 
C52 C53 C54 S4 178.7(2) . . . . ? 
C47 C53 C54 S4 -3.9(4) . . . . ? 
C52 C53 C54 S3 2.4(4) . . . . ? 
C47 C53 C54 S3 179.78(19) . . . . ? 
C57 C55 C56 C59 2.0(4) . . . . ? 
S4 C55 C56 C59 -174.69(19) . . . . ? 
C57 C55 C56 S3 177.4(2) . . . . ? 
S4 C55 C56 S3 0.7(3) . . . . ? 
C56 C55 C57 O5 -122.3(3) . . . . ? 
S4 C55 C57 O5 54.5(3) . . . . ? 
C56 C55 C57 O6 69.1(3) . . . . ? 
S4 C55 C57 O6 -114.15(19) . . . . ? 
C55 C56 C59 O7 17.9(4) . . . . ? 
S3 C56 C59 O7 -157.38(17) . . . . ? 
C55 C56 C59 O8 -162.7(2) . . . . ? 
S3 C56 C59 O8 22.0(3) . . . . ? 
N9 C12 Fe1 C10 147.8(19) . . . . ? 
N9 C12 Fe1 C11 -122.4(19) . . . . ? 
N9 C12 Fe1 N4 -32.5(19) . . . . ? 
N9 C12 Fe1 N6 24(3) . . . . ? 
N9 C12 Fe1 N2 56.6(19) . . . . ? 
N7 C10 Fe1 C12 -34(16) . . . . ? 
N7 C10 Fe1 C11 -121(16) . . . . ? 
N7 C10 Fe1 N4 -41(17) . . . . ? 
N7 C10 Fe1 N6 143(16) . . . . ? 
N7 C10 Fe1 N2 56(16) . . . . ? 
N8 C11 Fe1 C12 -1(20) . . . . ? 
N8 C11 Fe1 C10 87(20) . . . . ? 
N8 C11 Fe1 N4 -90(20) . . . . ? 
N8 C11 Fe1 N6 -180(100) . . . . ? 
N8 C11 Fe1 N2 -21(21) . . . . ? 
N18 C24 Fe2 C23 141.0(15) . . . . ? 
N18 C24 Fe2 C22 -130.7(15) . . . . ? 
N18 C24 Fe2 N13 48.1(15) . . . . ? 
N18 C24 Fe2 N11 17(3) . . . . ? 
N18 C24 Fe2 N15 -40.0(15) . . . . ? 
N17 C23 Fe2 C24 -29(3) . . . . ? 
N17 C23 Fe2 C22 -117(3) . . . . ? 
N17 C23 Fe2 N13 61(3) . . . . ? 
N17 C23 Fe2 N11 149(3) . . . . ? 
N17 C23 Fe2 N15 -54(4) . . . . ? 
N16 C22 Fe2 C24 10(2) . . . . ? 
N16 C22 Fe2 C23 99(2) . . . . ? 
N16 C22 Fe2 N13 -15(4) . . . . ? 
N16 C22 Fe2 N11 -168(2) . . . . ? 
N16 C22 Fe2 N15 -78(2) . . . . ? 
C2 C1 N1 N2 0.8(2) . . . . ? 
C2 C1 N1 B1 -179.26(18) . . . . ? 
N5 B1 N1 C1 124.33(19) . . . . ? 
N3 B1 N1 C1 -117.01(19) . . . . ? 
N5 B1 N1 N2 -55.69(19) . . . . ? 
N3 B1 N1 N2 62.97(17) . . . . ? 
C2 C3 N2 N1 1.23(18) . . . . ? 
C2 C3 N2 Fe1 -174.42(13) . . . . ? 
C1 N1 N2 C3 -1.23(19) . . . . ? 
B1 N1 N2 C3 178.78(15) . . . . ? 
C1 N1 N2 Fe1 175.15(10) . . . . ? 
B1 N1 N2 Fe1 -4.8(2) . . . . ? 
C12 Fe1 N2 C3 44.13(16) . . . . ? 
C10 Fe1 N2 C3 -44.30(16) . . . . ? 
C11 Fe1 N2 C3 63.9(16) . . . . ? 
N4 Fe1 N2 C3 133.10(17) . . . . ? 
N6 Fe1 N2 C3 -137.43(17) . . . . ? 
C12 Fe1 N2 N1 -131.07(15) . . . . ? 
C10 Fe1 N2 N1 140.51(15) . . . . ? 
C11 Fe1 N2 N1 -111.3(16) . . . . ? 
N4 Fe1 N2 N1 -42.09(16) . . . . ? 
N6 Fe1 N2 N1 47.38(16) . . . . ? 
C5 C4 N3 N4 0.1(2) . . . . ? 
C5 C4 N3 B1 -174.01(19) . . . . ? 
N5 B1 N3 C4 -127.2(2) . . . . ? 
N1 B1 N3 C4 113.9(2) . . . . ? 
N5 B1 N3 N4 58.8(2) . . . . ? 
N1 B1 N3 N4 -60.02(18) . . . . ? 
C5 C6 N4 N3 -0.16(19) . . . . ? 
C5 C6 N4 Fe1 174.38(13) . . . . ? 
C4 N3 N4 C6 0.0(2) . . . . ? 
B1 N3 N4 C6 175.37(16) . . . . ? 
C4 N3 N4 Fe1 -175.43(11) . . . . ? 
B1 N3 N4 Fe1 -0.1(2) . . . . ? 
C12 Fe1 N4 C6 -38.89(17) . . . . ? 
C10 Fe1 N4 C6 -32.4(17) . . . . ? 
C11 Fe1 N4 C6 48.00(17) . . . . ? 
N6 Fe1 N4 C6 143.55(18) . . . . ? 
N2 Fe1 N4 C6 -129.31(18) . . . . ? 
C12 Fe1 N4 N3 134.96(16) . . . . ? 
C10 Fe1 N4 N3 141.4(17) . . . . ? 
C11 Fe1 N4 N3 -138.15(16) . . . . ? 
N6 Fe1 N4 N3 -42.59(17) . . . . ? 
N2 Fe1 N4 N3 44.54(17) . . . . ? 
C8 C7 N5 N6 -3.9(2) . . . . ? 
C8 C7 N5 B1 175.0(2) . . . . ? 
N1 B1 N5 C7 -121.6(2) . . . . ? 
N3 B1 N5 C7 121.5(2) . . . . ? 
N1 B1 N5 N6 57.3(2) . . . . ? 
N3 B1 N5 N6 -59.7(2) . . . . ? 
C8 C9 N6 N5 1.4(2) . . . . ? 
C8 C9 N6 Fe1 -177.78(13) . . . . ? 
C7 N5 N6 C9 1.6(2) . . . . ? 
B1 N5 N6 C9 -177.44(17) . . . . ? 
C7 N5 N6 Fe1 -179.08(11) . . . . ? 
B1 N5 N6 Fe1 1.8(2) . . . . ? 
C12 Fe1 N6 C9 164.8(13) . . . . ? 
C10 Fe1 N6 C9 41.53(18) . . . . ? 
C11 Fe1 N6 C9 -48.49(18) . . . . ? 
N4 Fe1 N6 C9 -138.29(18) . . . . ? 
N2 Fe1 N6 C9 132.56(19) . . . . ? 
C12 Fe1 N6 N5 -14.3(14) . . . . ? 
C10 Fe1 N6 N5 -137.53(16) . . . . ? 
C11 Fe1 N6 N5 132.45(16) . . . . ? 
N4 Fe1 N6 N5 42.66(17) . . . . ? 
N2 Fe1 N6 N5 -46.50(17) . . . . ? 
Fe1 C12 N9 Co1 -6(2) . . . . ? 
N18 Co1 N9 C12 179.5(4) . . . . ? 
N22 Co1 N9 C12 91.0(4) . . . . ? 
N19 Co1 N9 C12 -93.0(4) . . . . ? 
N21 Co1 N9 C12 7.1(4) . . . . ? 
N20 Co1 N9 C12 -65.6(8) . . . . ? 
C14 C13 N10 N11 -1.5(2) . . . . ? 
C14 C13 N10 B2 176.35(19) . . . . ? 
N14 B2 N10 C13 124.04(18) . . . . ? 
N12 B2 N10 C13 -121.46(19) . . . . ? 
N14 B2 N10 N11 -58.3(2) . . . . ? 
N12 B2 N10 N11 56.21(19) . . . . ? 
C14 C15 N11 N10 0.07(19) . . . . ? 
C14 C15 N11 Fe2 -179.03(13) . . . . ? 
C13 N10 N11 C15 0.9(2) . . . . ? 
B2 N10 N11 C15 -177.20(16) . . . . ? 
C13 N10 N11 Fe2 -179.87(11) . . . . ? 
B2 N10 N11 Fe2 2.0(2) . . . . ? 
C24 Fe2 N11 C15 164.3(13) . . . . ? 
C23 Fe2 N11 C15 40.29(16) . . . . ? 
C22 Fe2 N11 C15 -48.13(17) . . . . ? 
N13 Fe2 N11 C15 133.17(17) . . . . ? 
N15 Fe2 N11 C15 -138.78(17) . . . . ? 
C24 Fe2 N11 N10 -14.7(13) . . . . ? 
C23 Fe2 N11 N10 -138.73(15) . . . . ? 
C22 Fe2 N11 N10 132.85(15) . . . . ? 
N13 Fe2 N11 N10 -45.85(16) . . . . ? 
N15 Fe2 N11 N10 42.20(16) . . . . ? 
C17 C16 N12 N13 -1.2(2) . . . . ? 
C17 C16 N12 B2 177.14(18) . . . . ? 
N14 B2 N12 C16 -120.2(2) . . . . ? 
N10 B2 N12 C16 125.78(19) . . . . ? 
N14 B2 N12 N13 58.00(17) . . . . ? 
N10 B2 N12 N13 -56.02(18) . . . . ? 
C16 N12 N13 C18 -0.40(19) . . . . ? 
B2 N12 N13 C18 -179.04(14) . . . . ? 
C16 N12 N13 Fe2 177.42(11) . . . . ? 
B2 N12 N13 Fe2 -1.2(2) . . . . ? 
C17 C18 N13 N12 1.72(17) . . . . ? 
C17 C18 N13 Fe2 -175.75(12) . . . . ? 
C24 Fe2 N13 N12 -132.53(15) . . . . ? 
C23 Fe2 N13 N12 138.42(15) . . . . ? 
C22 Fe2 N13 N12 -107.2(14) . . . . ? 
N11 Fe2 N13 N12 45.81(16) . . . . ? 
N15 Fe2 N13 N12 -43.79(16) . . . . ? 
C24 Fe2 N13 C18 44.66(15) . . . . ? 
C23 Fe2 N13 C18 -44.39(15) . . . . ? 
C22 Fe2 N13 C18 69.9(14) . . . . ? 
N11 Fe2 N13 C18 -136.99(16) . . . . ? 
N15 Fe2 N13 C18 133.41(16) . . . . ? 
C20 C19 N14 N15 0.8(2) . . . . ? 
C20 C19 N14 B2 -173.5(2) . . . . ? 
N12 B2 N14 N15 -56.56(19) . . . . ? 
N10 B2 N14 N15 58.0(2) . . . . ? 
N12 B2 N14 C19 117.2(2) . . . . ? 
N10 B2 N14 C19 -128.19(19) . . . . ? 
C20 C21 N15 N14 -1.4(2) . . . . ? 
C20 C21 N15 Fe2 175.48(12) . . . . ? 
C19 N14 N15 C21 0.36(19) . . . . ? 
B2 N14 N15 C21 175.44(16) . . . . ? 
C19 N14 N15 Fe2 -177.06(12) . . . . ? 
B2 N14 N15 Fe2 -2.0(2) . . . . ? 
C24 Fe2 N15 C21 -41.81(16) . . . . ? 
C23 Fe2 N15 C21 -16.6(16) . . . . ? 
C22 Fe2 N15 C21 46.23(16) . . . . ? 
N13 Fe2 N15 C21 -131.21(17) . . . . ? 
N11 Fe2 N15 C21 140.87(17) . . . . ? 
C24 Fe2 N15 N14 134.80(15) . . . . ? 
C23 Fe2 N15 N14 160.0(16) . . . . ? 
C22 Fe2 N15 N14 -137.16(15) . . . . ? 
N13 Fe2 N15 N14 45.40(16) . . . . ? 
N11 Fe2 N15 N14 -42.52(16) . . . . ? 
Fe2 C24 N18 Co1 2.0(17) . . . . ? 
N9 Co1 N18 C24 -178.5(4) . . . . ? 
N22 Co1 N18 C24 -91.0(4) . . . . ? 
N19 Co1 N18 C24 92.4(4) . . . . ? 
N21 Co1 N18 C24 -76.1(7) . . . . ? 
N20 Co1 N18 C24 7.9(4) . . . . ? 
C28 C29 N19 C25 1.8(3) . . . . ? 
C35 C29 N19 C25 -178.88(19) . . . . ? 
C28 C29 N19 Co1 171.18(17) . . . . ? 
C35 C29 N19 Co1 -9.5(3) . . . . ? 
C26 C25 N19 C29 -3.4(3) . . . . ? 
C26 C25 N19 Co1 -173.63(16) . . . . ? 
N18 Co1 N19 C29 -121.45(16) . . . . ? 
N9 Co1 N19 C29 145.42(16) . . . . ? 
N22 Co1 N19 C29 -162.5(8) . . . . ? 
N21 Co1 N19 C29 56.98(16) . . . . ? 
N20 Co1 N19 C29 -31.30(15) . . . . ? 
N18 Co1 N19 C25 48.28(13) . . . . ? 
N9 Co1 N19 C25 -44.85(13) . . . . ? 
N22 Co1 N19 C25 7.2(10) . . . . ? 
N21 Co1 N19 C25 -133.29(13) . . . . ? 
N20 Co1 N19 C25 138.43(14) . . . . ? 
C33 C34 N20 C30 -0.1(3) . . . . ? 
C35 C34 N20 C30 175.9(2) . . . . ? 
C33 C34 N20 Co1 176.67(19) . . . . ? 
C35 C34 N20 Co1 -7.4(3) . . . . ? 
C31 C30 N20 C34 1.6(3) . . . . ? 
C31 C30 N20 Co1 -175.19(18) . . . . ? 
N18 Co1 N20 C34 127.25(14) . . . . ? 
N9 Co1 N20 C34 12.1(7) . . . . ? 
N22 Co1 N20 C34 -144.20(14) . . . . ? 
N19 Co1 N20 C34 39.65(14) . . . . ? 
N21 Co1 N20 C34 -60.47(14) . . . . ? 
N18 Co1 N20 C30 -56.03(14) . . . . ? 
N9 Co1 N20 C30 -171.2(5) . . . . ? 
N22 Co1 N20 C30 32.52(14) . . . . ? 
N19 Co1 N20 C30 -143.63(14) . . . . ? 
N21 Co1 N20 C30 116.25(14) . . . . ? 
C44 C43 N21 C47 0.0(3) . . . . ? 
C44 C43 N21 Co1 -179.80(18) . . . . ? 
C46 C47 N21 C43 -0.9(3) . . . . ? 
C53 C47 N21 C43 175.89(19) . . . . ? 
C46 C47 N21 Co1 178.90(16) . . . . ? 
C53 C47 N21 Co1 -4.4(2) . . . . ? 
N18 Co1 N21 C43 -157.3(5) . . . . ? 
N9 Co1 N21 C43 -54.59(14) . . . . ? 
N22 Co1 N21 C43 -142.36(14) . . . . ? 
N19 Co1 N21 C43 34.41(15) . . . . ? 
N20 Co1 N21 C43 118.63(14) . . . . ? 
N18 Co1 N21 C47 23.0(7) . . . . ? 
N9 Co1 N21 C47 125.66(14) . . . . ? 
N22 Co1 N21 C47 37.88(14) . . . . ? 
N19 Co1 N21 C47 -145.35(14) . . . . ? 
N20 Co1 N21 C47 -61.13(14) . . . . ? 
C49 C48 N22 C52 3.3(3) . . . . ? 
C49 C48 N22 Co1 -173.37(19) . . . . ? 
C51 C52 N22 C48 -4.5(3) . . . . ? 
C53 C52 N22 C48 -179.5(2) . . . . ? 
C51 C52 N22 Co1 171.94(18) . . . . ? 
C53 C52 N22 Co1 -3.0(3) . . . . ? 
N18 Co1 N22 C48 -40.05(14) . . . . ? 
N9 Co1 N22 C48 53.11(14) . . . . ? 
N19 Co1 N22 C48 1.0(10) . . . . ? 
N21 Co1 N22 C48 141.95(14) . . . . ? 
N20 Co1 N22 C48 -129.74(14) . . . . ? 
N18 Co1 N22 C52 143.53(15) . . . . ? 
N9 Co1 N22 C52 -123.31(15) . . . . ? 
N19 Co1 N22 C52 -175.4(8) . . . . ? 
N21 Co1 N22 C52 -34.48(15) . . . . ? 
N20 Co1 N22 C52 53.84(16) . . . . ? 
O2 C39 O1 C40 -3.3(3) . . . . ? 
C38 C39 O1 C40 173.6(2) . . . . ? 
O4 C41 O3 C42 1.5(3) . . . . ? 
C37 C41 O3 C42 -179.24(17) . . . . ? 
O5 C57 O6 C58 13.6(3) . . . . ? 
C55 C57 O6 C58 -178.03(17) . . . . ? 
O7 C59 O8 C60 -1.2(3) . . . . ? 
C56 C59 O8 C60 179.43(18) . . . . ? 
C37 C38 S1 C36 -4.4(2) . . . . ? 
C39 C38 S1 C36 172.82(18) . . . . ? 
C35 C36 S1 C38 -166.1(2) . . . . ? 
S2 C36 S1 C38 8.78(15) . . . . ? 
C35 C36 S2 C37 165.3(2) . . . . ? 
S1 C36 S2 C37 -9.59(15) . . . . ? 
C38 C37 S2 C36 6.5(2) . . . . ? 
C41 C37 S2 C36 -174.40(18) . . . . ? 
C55 C56 S3 C54 6.1(2) . . . . ? 
C59 C56 S3 C54 -178.23(19) . . . . ? 
C53 C54 S3 C56 166.2(2) . . . . ? 
S4 C54 S3 C56 -10.47(16) . . . . ? 
C56 C55 S4 C54 -7.2(2) . . . . ? 
C57 C55 S4 C54 175.74(19) . . . . ? 
C53 C54 S4 C55 -165.9(3) . . . . ? 
S3 C54 S4 C55 10.73(16) . . . . ? 
 
_diffrn_measured_fraction_theta_max    0.996 
_diffrn_reflns_theta_full              26.00 
_diffrn_measured_fraction_theta_full   0.996 
_refine_diff_density_max    0.435 
_refine_diff_density_min   -0.705 
_refine_diff_density_rms    0.044 

#===END
